# Supplementary material for: The Repertoire of Solute-Binding Proteins of Model Bacteria Reveals Large Differences in Number, Type, and Ligand Range
Source: PubMed Central journal article supplement (PMC9602780; doi:10.1128/spectrum.02054-22), 2022-09-19
Supplement: spectrum.02054-22-s0001.pdf [file spectrum.02054-22-s0001.pdf]

**Supplemental Material**

**to**

**The repertoire of solute binding proteins of model bacteria reveals large  
differences in number, type and ligand range**

**by**

Álvaro Ortega, Miguel A. Matilla and Tino Krell

**Figure S1) Flowchart of the individual steps leading to the establishment of the SBP repertoire of the 49 bacterial model strains used in this work.**

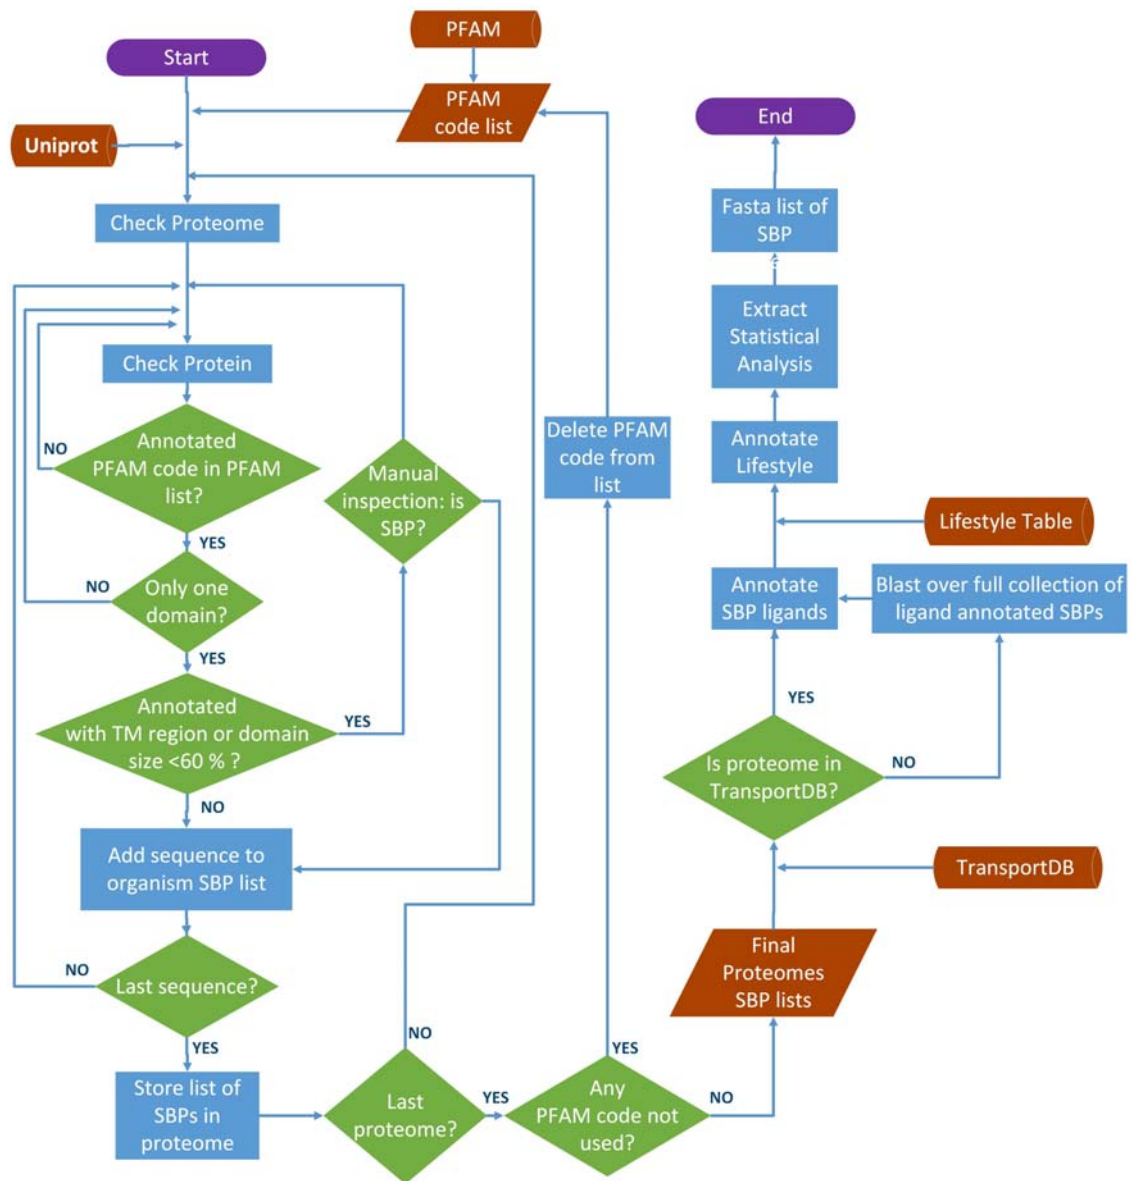

**Table S1) Assignment of a lifestyle to the different bacterial strains.**

| <b>Strain</b>                                     | <b>Lifestyle/Isolation source</b> | <b>Comments</b>                                                                                                                                                                                                                                                                                                                                 | <b>Ref.</b>  |
|---------------------------------------------------|-----------------------------------|-------------------------------------------------------------------------------------------------------------------------------------------------------------------------------------------------------------------------------------------------------------------------------------------------------------------------------------------------|--------------|
| <i>Thermotoga maritima</i> MSB8                   | Sediments (marine/fresh water)    | Isolated from a geothermal heated marine sediment (anaerobic marine mud) at Porto di Levante, Vulcano, Italy. Free living, non-spore-forming, rod-shaped bacterium. Grows optimally at 80 °C. Metabolizes many simple and complex carbohydrates including glucose, sucrose, starch, cellulose and xylan. Habitat: Marine, marine sediment, mud. | (1)          |
| <i>Chlamydia trachomatis</i> D/UW-3/CX            | Human/animal pathogen             | Genitotropic isolate, isolated from the cervix of an asymptomatic female. Opportunistic human pathogen. Causal agent of preventable blindness and sexually transmitted disease (STD) in humans.                                                                                                                                                 | (2)          |
| <i>Borrelia burgdorferi</i> B31                   | Human/animal pathogen             | Isolated from ticks, <i>Ixodes dammini</i> , in New York in 1981. Human and animal pathogen, aetiologic agent of Lyme disease.                                                                                                                                                                                                                  | (3)          |
| <i>Spirochaeta thermophila</i> Z-1203 (=DSM 6578) | Fresh/marine waters               | Isolated from a marine hot spring in Shiashkoten island (Russia). Free living, non-pathogenic. Habitat: Aquatic, hot spring, marine.                                                                                                                                                                                                            | <sup>a</sup> |
| <i>Synechocystis</i> sp. PCC 6803                 | Fresh/marine waters               | Isolated from freshwater lake in 1968. Photosynthetic cyanobacteria, non-pathogenic.                                                                                                                                                                                                                                                            | (4)          |
| <i>Anabaena cylindrica</i> PCC 7122               | Fresh/marine waters               | Isolated from water, most likely pond, in Cambridge (UK) in 1939. Photosynthetic bacterium. Free living, non-pathogenic.                                                                                                                                                                                                                        | <sup>b</sup> |
| <i>Streptomyces coelicolor</i> A3(2)              | Soil                              | Saprophytic soil-dwelling, filamentous bacteria. Antibiotic producer. Free-living.                                                                                                                                                                                                                                                              | (5)          |
| <i>Nocardia brasiliensis</i> ATCC 700358          | Human/animal pathogen             | Isolated from human mycetoma in Monterrey (Mexico) in 1989. Largely found in <i>in vitro</i> and experimental models of actinomycetoma. Soil                                                                                                                                                                                                    | (6)          |

|                                                       |                             |                                                                                                                                                                                                                                                                                                                |      |
|-------------------------------------------------------|-----------------------------|----------------------------------------------------------------------------------------------------------------------------------------------------------------------------------------------------------------------------------------------------------------------------------------------------------------|------|
|                                                       |                             | inhabitant actinobacterium. Human pathogen.                                                                                                                                                                                                                                                                    |      |
| <i>Mycobacterium tuberculosis</i> H37Rv               | Human/animal pathogen       | Isolated from a human lung in 1905 and passaged outside of the human host. Human and animal pathogen. Susceptible to drugs and amenable to genetic manipulation. Causal agent of tuberculosis.                                                                                                                 | (7)  |
| <i>Clostridium botulinum</i> A str. ATCC 3502         | Human/animal pathogen       | Isolated from a case of foodborne botulism associated with canned peas in California in the early 1920s. Causative agent of botulism in humans and animals. Can live in soils.                                                                                                                                 | (8)  |
| <i>Lactobacillus acidophilus</i> NCFM                 | Human intestinal microflora | First isolated in the 1970s from human feces. Contribute to the organisms' gastric survival and promote interactions with the intestinal mucosa and microbiota. Habitat: Host, intestinal tract, oral cavity, vagina. Probiotic strain. Non-pathogenic.                                                        | (9)  |
| <i>Lactococcus lactis</i> subsp. <i>lactis</i> IL1403 | Food                        | The strain IL1403 is a plasmid-free derivative of the strain IL594, isolated from a cheese starter culture. Now used as a lab workhorse. Free-living.                                                                                                                                                          | (10) |
| <i>Streptococcus pneumoniae</i> R6                    | Human/animal pathogen       | Avirulent laboratory-adapted <i>Streptococcus pneumoniae</i> D39 derivative that lacks polysaccharide capsule. D39 is a clinical isolate from 1916. Human and animal pathogen. Causal agent of pneumococcal disease. Strain R6 is genetically tractable and is used worldwide as a standard laboratory strain. | (11) |
| <i>Staphylococcus aureus</i> NCTC 8325                | Human/animal pathogen       | Isolated in 1960 from a sepsis patient. Host associated. Causative agent of staphylococcal scarlet fever and toxic-shock syndrome. Human pathogen.                                                                                                                                                             | (12) |
| <i>Geobacillus thermodenitrificans</i> NG80-2         | Oil reservoir               | Isolated from a deep-subsurface oil reservoir in Dagang oilfield, Northern China. Non-pathogenic. Habitat: Fresh water, oil fields.                                                                                                                                                                            | (13) |

|                                                     |                       |                                                                                                                                                                                                                                                                                                                       |              |
|-----------------------------------------------------|-----------------------|-----------------------------------------------------------------------------------------------------------------------------------------------------------------------------------------------------------------------------------------------------------------------------------------------------------------------|--------------|
| <i>Bacillus amyloliquefaciens</i> FZB42             | Soil                  | Isolated from a plant-pathogen infested soil and its organic material. Plant root-colonizing bacterium. Stimulates plant growth and produces secondary metabolites that suppress soil-borne plant pathogens.                                                                                                          | (14)         |
| <i>Bacillus subtilis</i> subsp. <i>subtilis</i> 168 | Soil                  | Radiation induced mutant of the <i>Bacillus subtilis</i> Marburg strain in 1947. Highly transformable and tryptophan auxotroph strain. Used worldwide as a standard laboratory strain. Nonpathogenic, aerobic, endospore-forming, rod-shaped bacterium. <i>Bacillus subtilis</i> species are commonly found in soils. | (15)         |
| <i>Bdellovibrio bacteriovorus</i> HD100             | Soil                  | Soil isolate. Free living. Predator of other Gram-negative bacteria. Habitat: Fresh water, soil. Bacteriolytic, ectoparasite.                                                                                                                                                                                         | (16)         |
| <i>Helicobacter pylori</i> 26695                    | Human/animal pathogen | Isolated from a patient in the United Kingdom with gastritis. Human pathogen. Causes gastric inflammation and ulcer.                                                                                                                                                                                                  | (17)         |
| <i>Neisseria meningitidis</i> MC58                  | Human/animal pathogen | Isolated from a patient with meningococcal meningitis in the UK. Human pathogen. Causes meningococcal infection and septicemia.                                                                                                                                                                                       | (18)         |
| <i>Bordetella pertussis</i> Tohama I                | Human/animal pathogen | Originally isolated from a patient with whooping cough in Japan in the 1950s, and used as a vaccine strain. Human pathogen. Causal agent of Pertussis - respiratory infection                                                                                                                                         | (19)         |
| <i>Comamonas testosteroni</i> CNB-2                 | Active sludge         | Strain CNB-2 is a mutant of <i>C. testosteroni</i> CNB-1 that lost the degrading plasmid pCNB1. Strain CNB-1 was isolated from activated sludge. Capable of mineralizing complex and xenobiotic compounds, such as testosterone and 4-chloronitrobenzene (CNB). Free living.                                          | (20)         |
| <i>Burkholderia cepacia</i> 383                     | Soil                  | Isolated from forest soil in Trinidad in 1958. Nitrogen fixer. <i>Burkholderia cepacia</i> strains are common opportunistic pathogens that cause lung infections in immunocompromised and cystic fibrosis patients. Habitat: Host, rhizosphere, soil.                                                                 | <sup>c</sup> |

|                                                                                                                     |                             |                                                                                                                                                                                                                                                                                                                                                                                                       |      |
|---------------------------------------------------------------------------------------------------------------------|-----------------------------|-------------------------------------------------------------------------------------------------------------------------------------------------------------------------------------------------------------------------------------------------------------------------------------------------------------------------------------------------------------------------------------------------------|------|
| <i>Ralstonia solanacearum</i><br>GMI1000                                                                            | Plant pathogen              | Isolated from a wilted tomato plant in the French Guyana. Plant pathogen. <i>Ralstonia solanacearum</i> species are devastating, soil-borne plant pathogens that are the agents causing bacterial wilt disease in over 200 plant species, important crops like potato, tomato, peanut, eggplant and banana.                                                                                           | (21) |
| <i>Sphingomonas wittichii</i><br>RW1                                                                                | Fresh/marine waters         | Isolated from river Elbe (Germany) due to its ability to grow on toxic dioxin pollutants as the sole carbon and energy source.                                                                                                                                                                                                                                                                        | (22) |
| <i>Caulobacter crescentus</i><br>CB15                                                                               | Fresh/marine waters         | Isolated from a pond water in the USA. Free-living non-pathogenic bacterium.                                                                                                                                                                                                                                                                                                                          | (23) |
| <i>Rhodobacter sphaeroides</i><br>ATCC 17025                                                                        | Fresh/marine waters         | Unknown isolation source. Metabolically diverse, nonsulfur, denitrifier, phototrophic bacterium. Can detoxify metal oxides. Non-pathogenic. This species is frequently found in soils, in anoxic zones of waters, mud, sludge, and in organic-rich water habitats. Free living.                                                                                                                       | (24) |
| <i>Azospirillum baldaniorum</i> Sp245 <sup>T</sup><br>(formerly <i>Azospirillum brasilense</i> Sp245 <sup>T</sup> ) | Beneficial plant associated | Isolated from a wheat ( <i>Triticum aestivum</i> L.) root in Brazil. Bacteria of the genus <i>Azospirillum</i> are found primarily in terrestrial habitats, where they colonize roots of important cereals and other grasses and promote plant growth by several mechanisms, including its ability to fix atmospheric nitrogen and to produce plant-beneficial compounds. Habitat: Rhizosphere, soil. | (25) |
| <i>Brucella abortus</i> 2308                                                                                        | Human/animal pathogen       | Highly virulent strain recovered in 1940 from an aborted fetus of a cow. The host range is humans, cattle, and certain other domestic animals. Host-associated. Intracellular parasite. Causes spontaneous abortion.                                                                                                                                                                                  | (26) |
| <i>Sinorhizobium (Ensifer) meliloti</i> 1021                                                                        | Beneficial plant associated | Endosymbiont of alfalfa ( <i>Medicago sativa</i> ) and its close relative <i>Medicago truncatula</i> . Forms agronomically important N <sub>2</sub> -fixing root nodules in legumes. The strain 1021 is a streptomycin resistant derivative of the strain 2011 - a nitrogen-fixing symbiont capable of                                                                                                | (27) |

|                                                                             |                                |                                                                                                                                                                                                                                                                                                                                                                                                                   |      |
|-----------------------------------------------------------------------------|--------------------------------|-------------------------------------------------------------------------------------------------------------------------------------------------------------------------------------------------------------------------------------------------------------------------------------------------------------------------------------------------------------------------------------------------------------------|------|
|                                                                             |                                | living either free in the soil or in symbiotic association with roots of legume plants such as the model legume <i>Medicago truncatula</i> .                                                                                                                                                                                                                                                                      |      |
| <i>Agrobacterium fabrum</i> C58                                             | Plant pathogen                 | Isolated from a cherry tree ( <i>Prunus</i> sp. Cv. Montmorency) tumor. Plant pathogen. Causal agent of crown gall disease in plants.                                                                                                                                                                                                                                                                             | (28) |
| <i>Acinetobacter baumannii</i> AB0057                                       | Human/animal pathogen          | Isolated from a patient with bloodstream infection at Walter Reed Army Medical Center (USA). Human pathogen. <i>Acinetobacter baumannii</i> is the leading cause of opportunistic nosocomial infections in immunocompromised hosts. This human pathogen is responsible for a vast array of infections, of which ventilator-associated pneumonia and urinary tract and bloodstream infections are the most common. | (29) |
| <i>Xanthomonas campestris</i> pv. <i>campestris</i> ATCC 33913)             | Plant pathogen                 | Isolated from cabbage ( <i>Brassica oleracea</i> var. <i>gemmifera</i> ). Plant pathogen. Causes black rot, which affects crucifers such as Brassica and Arabidopsis.                                                                                                                                                                                                                                             | (30) |
| <i>Legionella pneumophila</i> subsp. <i>pneumophila</i> str. Philadelphia-1 | Human/animal pathogen          | Isolated from a lung specimen of a patient who had died from Legionnaires' disease. Human pathogen. Causal agent of Legionellosis.                                                                                                                                                                                                                                                                                | (31) |
| <i>Shewanella oneidensis</i> MR-1                                           | Sediments (marine/fresh water) | Sediment isolate from the Oneida lake in New York (USA). Facultatively aerobic bacterium with diverse respiratory capacities (i.e. reduction of iron and manganese oxides). Model organism for bioremediation studies.                                                                                                                                                                                            | (32) |
| <i>Aliivibrio fischeri</i> MJ11                                             | Animal symbiont                | Isolated from the light organ of the Japanese pinecone fish, <i>Monocentris japonica</i> , in Japan. Fish symbiont. Host-associated.                                                                                                                                                                                                                                                                              | (33) |
| <i>Vibrio cholerae</i> O1 biovar El Tor str. N16961                         | Human/animal pathogen          | Isolated from a stool from a cholera patient in an epidemic outbreak in Bangladesh in 1971. Hemolysin producer. Habitat: Gastrointestinal tract. Human pathogen. Causal agent of cholera disease.                                                                                                                                                                                                                 | (34) |

|                                                      |                       |                                                                                                                                                                                                                                                                                                                                                              |      |
|------------------------------------------------------|-----------------------|--------------------------------------------------------------------------------------------------------------------------------------------------------------------------------------------------------------------------------------------------------------------------------------------------------------------------------------------------------------|------|
| <i>Azotobacter vinelandii</i> DJ                     | Soil                  | A high-frequency transforming variant of <i>Azotobacter vinelandii</i> UW generated in 1984 through multiple rounds of transformation. UW is a soil bacterium related to the <i>Pseudomonas</i> genus that fixes nitrogen under aerobic conditions, while simultaneously protecting nitrogenase from oxygen damage. Stores polyhydroxybutyrate. Free living. | (35) |
| <i>Pseudomonas syringae</i> pv. <i>tomato</i> DC3000 | Plant pathogen        | Isolated in 1960 from tomato in the Channel Islands in Guernsey, United Kingdom. Causes bacterial speck disease in plants including tomato and <i>Arabidopsis thaliana</i> . Habitat: Plant endophyte, fresh water, soil.                                                                                                                                    | (36) |
| <i>Pseudomonas fluorescens</i> Pf0-1                 | Soil                  | Isolated in 1987 from an agricultural loam soil in Massachusetts (USA). Considered as a bacterium potentially important for biocontrol and bioremediation. Rhizosphere colonizer. Habitat: Soil, terrestrial, rhizosphere. Non-pathogenic.                                                                                                                   | (37) |
| <i>Pseudomonas putida</i> KT2440                     | Soil                  | Saprophytic soil isolate. Rhizosphere colonizer, plant-growth promoter and biocontrol agent. Plasmid-free derivative of a toluene-degrading bacterium, <i>P. putida</i> mt-2. Certified as a biosafety host for the cloning of foreign genes.                                                                                                                | (38) |
| <i>Pseudomonas aeruginosa</i> PAO1                   | Human/animal pathogen | A spontaneous chloramphenicol-resistant mutant of the original PAO strain (earlier called <i>P. aeruginosa</i> strain 1) that had been isolated in 1954 from a wound in Melbourne, Australia. Now a lab workhorse. Intrinsically resistant to antibiotics and disinfectants. Opportunistic human pathogen. Habitat: Fresh water, host, soil, wastewater.     | (39) |
| <i>Pectobacterium atrosepticum</i> SCRI1043          | Plant pathogen        | Isolated from a potato stem with blackleg disease symptoms in 1985 in Perthshire, Scotland. Plant pathogen. Causative agent of soft rot and blackleg potato diseases.                                                                                                                                                                                        | (40) |
| <i>Photorhabdus luminescens</i> subsp.               | Human/animal pathogen | A symbiont of the nematode <i>Heterorhabditis bacteriophora</i> isolated on Trinidad and Tobago. Host associated. Can cause septicemia and                                                                                                                                                                                                                   | (41) |



|                                                       |                             |                                                                                                                                                                                                                                                                                                                                                                                                                                                                                                                           |      |
|-------------------------------------------------------|-----------------------------|---------------------------------------------------------------------------------------------------------------------------------------------------------------------------------------------------------------------------------------------------------------------------------------------------------------------------------------------------------------------------------------------------------------------------------------------------------------------------------------------------------------------------|------|
| <i>laumondii</i> TTO1                                 |                             | toxemia. Symbiotic with soil entomopathogenic nematodes and pathogenic to a wide range of insects.                                                                                                                                                                                                                                                                                                                                                                                                                        |      |
| <i>Yersinia pestis</i> Nepal516                       | Human/animal pathogen       | Isolated from a human infection in Nepal, possibly from a 1967 outbreak of pneumonic plague. Causal agent of bubonic and pneumonic plague. Human pathogen. Habitat: host and soil.                                                                                                                                                                                                                                                                                                                                        | (42) |
| <i>Serratia plymuthica</i> S13                        | Beneficial plant associated | Isolated from the anthosphere of styrian oil pumpkin ( <i>Cucurbita pepo</i> L. subsp. <i>pepo</i> var. <i>styriaca</i> ). Rhizosphere and endosphere colonizer. Biocontrol agent.                                                                                                                                                                                                                                                                                                                                        | (43) |
| <i>Salmonella typhimurium</i> serovar Typhimurium LT2 | Human/animal pathogen       | Isolated from a human clinical infection at Stoke Mandeville hospital (UK) in the 1940s. Model strain to studying the genetics of <i>Salmonella</i> worldwide. Human and animal pathogen. Leading cause of human gastroenteritis.                                                                                                                                                                                                                                                                                         | (44) |
| <i>Escherichia coli</i> MG1655                        | Human intestinal microflora | MG1655 was derived from the strain W1485, which was derived from a stab-culture descendant of the original K-12 isolate. This original <i>E. coli</i> strain K-12 was obtained from a stool sample of a diphtheria patient in Palo Alto (California, USA) in 1922. Colonizes the lower gut of humans and animals. Maintained as a laboratory strain with minimal genetic manipulation, having only been cured of the temperate bacteriophage lambda and F plasmid by ultraviolet light and acridine orange, respectively. | (45) |
| <i>Klebsiella pneumoniae</i> HS11286                  | Human/animal pathogen       | Human sputum isolate from a patient in Shanghai (China). Antibiotic resistant. Human pathogen.                                                                                                                                                                                                                                                                                                                                                                                                                            | (46) |

<sup>a</sup> NC\_017583.1

<sup>b</sup> NC\_019771.1 (chromosome), NC\_019772.1, NC\_020157.1, NC\_019773.1, NC\_019774.1, NC\_020056.1, NC\_019775.1 (six plasmids)

<sup>c</sup> NC\_007509.1, NC\_007510.1, NC\_007511.1 (three chromosomes)

## REFERENCES

1. Latif H, Lerman JA, Portnoy VA, Tarasova Y, Nagarajan H, Schrimpe-Rutledge AC, Smith RD, Adkins JN, Lee D-H, Qiu Y, Zengler K. 2013. The genome organization of *Thermotoga maritima* reflects its lifestyle. *PLoS Genet* 9:e1003485.
2. Stephens RS, Kalman S, Lammel C, Fan J, Marathe R, Aravind L, Mitchell W, Olinger L, Tatusov RL, Zhao Q, Koonin EV, Davis RW. 1998. Genome sequence of an obligate intracellular pathogen of humans: *Chlamydia trachomatis*. *Science* 282:754–759.
3. Fraser CM, Casjens S, Huang WM, Sutton GG, Clayton R, Lathigra R, White O, Ketchum KA, Dodson R, Hickey EK, Gwinn M, Dougherty B, Tomb JF, Fleischmann RD, Richardson D, Peterson J, Kerlavage AR, Quackenbush J, Salzberg S, Hanson M, van Vugt R, Palmer N, Adams MD, Gocayne J, Weidman J, Utterback T, Wathley L, McDonald L, Artiach P, Bowman C, Garland S, Fuji C, Cotton MD, Horst K, Roberts K, Hatch B, Smith HO, Venter JC. 1997. Genomic sequence of a Lyme disease spirochaete, *Borrelia burgdorferi*. *Nature* 390:580–586.
4. Kaneko T, Sato S, Kotani H, Tanaka A, Asamizu E, Nakamura Y, Miyajima N, Hirosawa M, Sugiura M, Sasamoto S, Kimura T, Hosouchi T, Matsuno A, Muraki A, Nakazaki N, Naruo K, Okumura S, Shimpo S, Takeuchi C, Wada T, Watanabe A, Yamada M, Yasuda M, Tabata S. 1996. Sequence analysis of the genome of the unicellular cyanobacterium *Synechocystis* sp. strain PCC6803. II. Sequence determination of the entire genome and assignment of potential protein-coding regions. *DNA Res* 3:109–136.
5. Bentley SD, Chater KF, Cerdeño-Tárraga A-M, Challis GL, Thomson NR, James KD, Harris DE, Quail MA, Kieser H, Harper D, Bateman A, Brown S, Chandra G, Chen CW, Collins M, Cronin A, Fraser A, Goble A, Hidalgo J, Hornsby T, Howarth S, Huang C-H, Kieser T, Larke L, Murphy L, Oliver K, O’Neil S, Rabinowitsch E, Rajandream M-A, Rutherford K, Rutter S, Seeger K, Saunders D, Sharp S, Squares R, Squares S, Taylor K, Warren T, Wietzorrek A, Woodward J, Barrell BG, Parkhill J, Hopwood DA. 2002. Complete genome sequence of the model actinomycete *Streptomyces coelicolor* A3(2). *Nature* 417:141–147.
6. Vera-Cabrera L, Ortiz-Lopez R, Elizondo-Gonzalez R, Perez-Maya AA, Ocampo-Candiani J. 2012. Complete genome sequence of *Nocardia brasiliensis* HUJEG-1. *J Bacteriol* 194:2761–2762.
7. Cole ST, Brosch R, Parkhill J, Garnier T, Churcher C, Harris D, Gordon SV, Eiglmeier K, Gas S, Barry CE, Tekaiia F, Badcock K, Basham D, Brown D, Chillingworth T, Connor R, Davies R, Devlin K, Feltwell T, Gentles S, Hamlin N, Holroyd S, Hornsby T, Jagels K, Krogh A, McLean J, Moule S, Murphy L, Oliver K, Osborne J, Quail MA, Rajandream MA, Rogers J, Rutter S, Seeger K, Skelton J, Squares R, Squares S, Sulston JE, Taylor K, Whitehead S, Barrell BG. 1998. Deciphering the biology of *Mycobacterium tuberculosis* from the complete genome sequence. *Nature* 393:537–544.
8. Sebahia M, Peck MW, Minton NP, Thomson NR, Holden MTG, Mitchell WJ, Carter AT, Bentley SD, Mason DR, Crossman L, Paul CJ, Ivens A, Wells-Bennik MHJ, Davis IJ, Cerdeño-Tárraga AM, Churcher C, Quail MA, Chillingworth T, Feltwell T, Fraser A, Goodhead I, Hance Z, Jagels K, Larke N, Maddison M, Moule S, Mungall K, Norbertczak H, Rabinowitsch E, Sanders M, Simmonds M, White B, Whithead S, Parkhill J. 2007. Genome sequence of a proteolytic (Group I) *Clostridium botulinum* strain Hall A and comparative analysis of the clostridial genomes. *Genome Res* 17:1082–1092.

9. Altermann E, Russell WM, Azcarate-Peril MA, Barrangou R, Buck BL, McAuliffe O, Souther N, Dobson A, Duong T, Callanan M, Lick S, Hamrick A, Cano R, Klaenhammer TR. 2005. Complete genome sequence of the probiotic lactic acid bacterium *Lactobacillus acidophilus* NCFM. *Proc Natl Acad Sci U S A* 102:3906–3912.
10. Bolotin A, Wincker P, Mauger S, Jaillon O, Malarne K, Weissenbach J, Ehrlich SD, Sorokin A. 2001. The complete genome sequence of the lactic acid bacterium *Lactococcus lactis* ssp. *lactis* IL1403. *Genome Res* 11:731–753.
11. Hoskins J, Alborn WE, Arnold J, Blaszczyk LC, Burgett S, DeHoff BS, Estrem ST, Fritz L, Fu DJ, Fuller W, Geringer C, Gilmour R, Glass JS, Khoja H, Kraft AR, Lagace RE, LeBlanc DJ, Lee LN, Lefkowitz EJ, Lu J, Matsushima P, McAhren SM, McHenney M, McLeaster K, Mundy CW, Nicas TI, Norris FH, O’Gara M, Peery RB, Robertson GT, Rockey P, Sun PM, Winkler ME, Yang Y, Young-Bellido M, Zhao G, Zook CA, Baltz RH, Jaskunas SR, Rosteck PR, Skatrud PL, Glass JI. 2001. Genome of the bacterium *Streptococcus pneumoniae* strain R6. *J Bacteriol* 183:5709–5717.
12. Gillaspay AF, Worrell V, Orvis J, Roe BA, Dyer DW, Iandolo JJ. 2006. The *Staphylococcus aureus* NCTC 8325 Genome, p. 381–412. *In* *Gram-Positive Pathogens*. John Wiley & Sons, Ltd.
13. Feng L, Wang W, Cheng J, Ren Y, Zhao G, Gao C, Tang Y, Liu X, Han W, Peng X, Liu R, Wang L. 2007. Genome and proteome of long-chain alkane degrading *Geobacillus thermodenitrificans* NG80-2 isolated from a deep-subsurface oil reservoir. *Proc Natl Acad Sci U S A* 104:5602–5607.
14. Chen XH, Koumoutsi A, Scholz R, Eisenreich A, Schneider K, Heinemeyer I, Morgenstern B, Voss B, Hess WR, Reva O, Junge H, Voigt B, Jungblut PR, Vater J, Süßmuth R, Liesegang H, Strittmatter A, Gottschalk G, Borriss R. 2007. Comparative analysis of the complete genome sequence of the plant growth-promoting bacterium *Bacillus amyloliquefaciens* FZB42. *Nat Biotechnol* 25:1007–1014.
15. Kunst F, Ogasawara N, Moszer I, Albertini AM, Alloni G, Azevedo V, Bertero MG, Bessières P, Bolotin A, Borchert S, Borriss R, Boursier L, Brans A, Braun M, Brignell SC, Bron S, Brouillet S, Bruschi CV, Caldwell B, Capuano V, Carter NM, Choi SK, Cordani JJ, Connerton IF, Cummings NJ, Daniel RA, Denziot F, Devine KM, Dusterhöft A, Ehrlich SD, Emmerson PT, Entian KD, Errington J, Fabret C, Ferrari E, Foulger D, Fritz C, Fujita M, Fujita Y, Fuma S, Galizzi A, Galleron N, Ghim SY, Glaser P, Goffeau A, Golightly EJ, Grandi G, Guiseppi G, Guy BJ, Haga K, Haiech J, Harwood CR, Hénaut A, Hilbert H, Holsappel S, Hosono S, Hullo MF, Itaya M, Jones L, Joris B, Karamata D, Kasahara Y, Klaerr-Blanchard M, Klein C, Kobayashi Y, Koetter P, Koningstein G, Krogh S, Kumano M, Kurita K, Lapidus A, Lardinois S, Lauber J, Lazarevic V, Lee SM, Levine A, Liu H, Masuda S, Mauël C, Médigue C, Medina N, Mellado RP, Mizuno M, Moestl D, Nakai S, Noback M, Noone D, O’Reilly M, Ogawa K, Ogiwara A, Oudega B, Park SH, Parro V, Pohl TM, Portelle D, Porwollik S, Prescott AM, Presecan E, Pujic P, Purnelle B, Rapoport G, Rey M, Reynolds S, Rieger M, Rivolta C, Rocha E, Roche B, Rose M, Sadaie Y, Sato T, Scanlan E, Schleich S, Schroeter R, Scoffone F, Sekiguchi J, Sekowska A, Seror SJ, Serror P, Shin BS, Soldo B, Sorokin A, Tacconi E, Takagi T, Takahashi H, Takemaru K, Takeuchi M, Tamakoshi A, Tanaka T, Terpstra P, Togoni A, Tosato V, Uchiyama S, Vandebol M, Vannier F, Vassarotti A, Viari A, Wambutt R, Wedler H, Weitzenegger T, Winters P, Wipat A, Yamamoto H, Yamane K, Yasumoto K, Yata K, Yoshida K, Yoshikawa HF, Zumstein E, Yoshikawa H, Danchin A. 1997. The complete genome sequence of the gram-positive bacterium *Bacillus subtilis*. *Nature* 390:249–256.

16. Rendulic S, Jagtap P, Rosinus A, Eppinger M, Baar C, Lanz C, Keller H, Lambert C, Evans KJ, Goesmann A, Meyer F, Sockett RE, Schuster SC. 2004. A predator unmasked: life cycle of *Bdellovibrio bacteriovorus* from a genomic perspective. *Science* 303:689–692.
17. Tomb JF, White O, Kerlavage AR, Clayton RA, Sutton GG, Fleischmann RD, Ketchum KA, Klenk HP, Gill S, Dougherty BA, Nelson K, Quackenbush J, Zhou L, Kirkness EF, Peterson S, Loftus B, Richardson D, Dodson R, Khalak HG, Glodek A, McKenney K, Fitzgerald LM, Lee N, Adams MD, Hickey EK, Berg DE, Gocayne JD, Utterback TR, Peterson JD, Kelley JM, Cotton MD, Weidman JM, Fujii C, Bowman C, Watthey L, Wallin E, Hayes WS, Borodovsky M, Karp PD, Smith HO, Fraser CM, Venter JC. 1997. The complete genome sequence of the gastric pathogen *Helicobacter pylori*. *Nature* 388:539–547.
18. Tettelin H, Saunders NJ, Heidelberg J, Jeffries AC, Nelson KE, Eisen JA, Ketchum KA, Hood DW, Peden JF, Dodson RJ, Nelson WC, Gwinn ML, DeBoy R, Peterson JD, Hickey EK, Haft DH, Salzberg SL, White O, Fleischmann RD, Dougherty BA, Mason T, Ciecko A, Parksey DS, Blair E, Citti H, Clark EB, Cotton MD, Utterback TR, Khouri H, Qin H, Vamathevan J, Gill J, Scarlato V, Maignani V, Pizza M, Grandi G, Sun L, Smith HO, Fraser CM, Moxon ER, Rappuoli R, Venter JC. 2000. Complete genome sequence of *Neisseria meningitidis* serogroup B strain MC58. *Science* 287:1809–1815.
19. Parkhill J, Sebahia M, Preston A, Murphy LD, Thomson N, Harris DE, Holden MTG, Churcher CM, Bentley SD, Mungall KL, Cerdeño-Tárraga AM, Temple L, James K, Harris B, Quail MA, Achtman M, Atkin R, Baker S, Basham D, Bason N, Cherevach I, Chillingworth T, Collins M, Cronin A, Davis P, Doggett J, Feltwell T, Goble A, Hamlin N, Hauser H, Holroyd S, Jagels K, Leather S, Moule S, Norberczak H, O’Neil S, Ormond D, Price C, Rabinowitsch E, Rutter S, Sanders M, Saunders D, Seeger K, Sharp S, Simmonds M, Skelton J, Squares R, Squares S, Stevens K, Unwin L, Whitehead S, Barrell BG, Maskell DJ. 2003. Comparative analysis of the genome sequences of *Bordetella pertussis*, *Bordetella parapertussis* and *Bordetella bronchiseptica*. *Nat Genet* 35:32–40.
20. Ma Y-F, Zhang Y, Zhang J-Y, Chen D-W, Zhu Y, Zheng H, Wang S-Y, Jiang C-Y, Zhao G-P, Liu S-J. 2009. The complete genome of *Comamonas testosteroni* reveals its genetic adaptations to changing environments. *Appl Environ Microbiol* 75:6812–6819.
21. Salanoubat M, Genin S, Artiguenave F, Gouzy J, Mangenot S, Arlat M, Billault A, Brottier P, Camus JC, Cattolico L, Chandler M, Choisne N, Claudel-Renard C, Cunnac S, Demange N, Gaspin C, Lavie M, Moisan A, Robert C, Saurin W, Schiex T, Siguier P, Thébault P, Whalen M, Wincker P, Levy M, Weissenbach J, Boucher CA. 2002. Genome sequence of the plant pathogen *Ralstonia solanacearum*. *Nature* 415:497–502.
22. Miller TR, Delcher AL, Salzberg SL, Saunders E, Detter JC, Halden RU. 2010. Genome sequence of the dioxin-mineralizing bacterium *Sphingomonas wittichii* RW1. *J Bacteriol* 192:6101–6102.
23. Nierman WC, Feldblyum TV, Laub MT, Paulsen IT, Nelson KE, Eisen J, Heidelberg JF, Alley MRK, Ohta N, Maddock JR, Potocka I, Nelson WC, Newton A, Stephens C, Phadke ND, Ely B, DeBoy RT, Dodson RJ, Durkin AS, Gwinn ML, Haft DH, Kolonay JF, Smit J, Craven MB, Khouri H, Shetty J, Berry K, Utterback T, Tran K, Wolf A, Vamathevan J, Ermolaeva M, White O, Salzberg SL, Venter JC, Shapiro L, Fraser CM. 2001. Complete genome sequence of *Caulobacter crescentus*. *Proc Natl Acad Sci U S A* 98:4136–4141.

24. Choudhary M, Zanhua X, Fu YX, Kaplan S. 2007. Genome analyses of three strains of *Rhodobacter sphaeroides*: evidence of rapid evolution of chromosome II. *J Bacteriol* 189:1914–1921.
25. Dos Santos Ferreira N, Hayashi Sant' Anna F, Massena Reis V, Ambrosini A, Gazolla Volpiano C, Rothballer M, Schwab S, Baura VA, Balsanelli E, Pedrosa F de O, Pereira Passaglia LM, Maltempi de Souza E, Hartmann A, Cassan F, Zilli JE. 2020. Genome-based reclassification of *Azospirillum brasilense* Sp245 as the type strain of *Azospirillum baldaniorum* sp. nov. *Int J Syst Evol Microbiol* 70:6203–6212.
26. Suárez-Esquivel M, Ruiz-Villalobos N, Castillo-Zeledón A, Jiménez-Rojas C, Roop II RM, Comerci DJ, Barquero-Calvo E, Chacón-Díaz C, Caswell CC, Baker KS, Chaves-Olarte E, Thomson NR, Moreno E, Letesson JJ, De Bolle X, Guzmán-Verri C. 2016. *Brucella abortus* Strain 2308 Wisconsin Genome: Importance of the Definition of Reference Strains. *Front Microbiol* 7:1557.
27. Capela D, Barloy-Hubler F, Gouzy J, Bothe G, Ampe F, Batut J, Boistard P, Becker A, Boutry M, Cadieu E, Dréano S, Gloux S, Godrie T, Goffeau A, Kahn D, Kiss E, Lelaure V, Masuy D, Pohl T, Portetelle D, Pühler A, Purnelle B, Ramsperger U, Renard C, Thébault P, Vandenbol M, Weidner S, Galibert F. 2001. Analysis of the chromosome sequence of the legume symbiont *Sinorhizobium meliloti* strain 1021. *Proc Natl Acad Sci U S A* 98:9877–9882.
28. Wood DW, Setubal JC, Kaul R, Monks DE, Kitajima JP, Okura VK, Zhou Y, Chen L, Wood GE, Almeida NF, Woo L, Chen Y, Paulsen IT, Eisen JA, Karp PD, Bovee D, Chapman P, Clendenning J, Deatherage G, Gillet W, Grant C, Kuttyavin T, Levy R, Li MJ, McClelland E, Palmieri A, Raymond C, Rouse G, Saenphimmachak C, Wu Z, Romero P, Gordon D, Zhang S, Yoo H, Tao Y, Biddle P, Jung M, Krespan W, Perry M, Gordon-Kamm B, Liao L, Kim S, Hendrick C, Zhao ZY, Dolan M, Chumley F, Tingey SV, Tomb JF, Gordon MP, Olson MV, Nester EW. 2001. The genome of the natural genetic engineer *Agrobacterium tumefaciens* C58. *Science* 294:2317–2323.
29. Adams MD, Goglin K, Molyneaux N, Hujer KM, Lavender H, Jamison JJ, MacDonald IJ, Martin KM, Russo T, Campagnari AA, Hujer AM, Bonomo RA, Gill SR. 2008. Comparative genome sequence analysis of multidrug-resistant *Acinetobacter baumannii*. *J Bacteriol* 190:8053–8064.
30. da Silva ACR, Ferro JA, Reinach FC, Farah CS, Furlan LR, Quaggio RB, Monteiro-Vitorello CB, Van Sluys MA, Almeida NF, Alves LMC, do Amaral AM, Bertolini MC, Camargo LEA, Camarotte G, Cannavan F, Cardozo J, Chambergo F, Ciapina LP, Cicarelli RMB, Coutinho LL, Cursino-Santos JR, El-Dorry H, Faria JB, Ferreira AJS, Ferreira RCC, Ferro MIT, Formighieri EF, Franco MC, Greggio CC, Gruber A, Katsuyama AM, Kishi LT, Leite RP, Lemos EGM, Lemos MVF, Locali EC, Machado MA, Madeira AMBN, Martinez-Rossi NM, Martins EC, Meidanis J, Menck CFM, Miyaki CY, Moon DH, Moreira LM, Novo MTM, Okura VK, Oliveira MC, Oliveira VR, Pereira HA, Rossi A, Sena J a. D, Silva C, de Souza RF, Spinola L a. F, Takita MA, Tamura RE, Teixeira EC, Tezza RID, Trindade dos Santos M, Truffi D, Tsai SM, White FF, Setubal JC, Kitajima JP. 2002. Comparison of the genomes of two *Xanthomonas* pathogens with differing host specificities. *Nature* 417:459–463.
31. Chien M, Morozova I, Shi S, Sheng H, Chen J, Gomez SM, Asamani G, Hill K, Nuara J, Feder M, Rineer J, Greenberg JJ, Steshenko V, Park SH, Zhao B, Teplitskaya E, Edwards JR, Pampou S, Georghiou A, Chou I-C, Iannuccilli W, Ulz ME, Kim DH, Geringer-Sameth A, Goldsberry C, Morozov P, Fischer SG, Segal G, Qu X, Rzhetsky A, Zhang P, Cayanis E, De Jong PJ, Ju J, Kalachikov S, Shuman HA, Russo JJ. 2004. The

- genomic sequence of the accidental pathogen *Legionella pneumophila*. *Science* 305:1966–1968.
32. Heidelberg JF, Paulsen IT, Nelson KE, Gaidos EJ, Nelson WC, Read TD, Eisen JA, Seshadri R, Ward N, Methe B, Clayton RA, Meyer T, Tsapin A, Scott J, Beanan M, Brinkac L, Daugherty S, DeBoy RT, Dodson RJ, Durkin AS, Haft DH, Kolonay JF, Madupu R, Peterson JD, Umayam LA, White O, Wolf AM, Vamathevan J, Weidman J, Impraim M, Lee K, Berry K, Lee C, Mueller J, Khouri H, Gill J, Utterback TR, McDonald LA, Feldblyum TV, Smith HO, Venter JC, Neelson KH, Fraser CM. 2002. Genome sequence of the dissimilatory metal ion-reducing bacterium *Shewanella oneidensis*. *Nat Biotechnol* 20:1118–1123.
  33. Mandel MJ, Stabb EV, Ruby EG. 2008. Comparative genomics-based investigation of resequencing targets in *Vibrio fischeri*: Focus on point miscalls and artefactual expansions. *BMC Genomics* 9:138.
  34. Heidelberg JF, Eisen JA, Nelson WC, Clayton RA, Gwinn ML, Dodson RJ, Haft DH, Hickey EK, Peterson JD, Umayam L, Gill SR, Nelson KE, Read TD, Tettelin H, Richardson D, Ermolaeva MD, Vamathevan J, Bass S, Qin H, Dragoi I, Sellers P, McDonald L, Utterback T, Fleishmann RD, Nierman WC, White O, Salzberg SL, Smith HO, Colwell RR, Mekalanos JJ, Venter JC, Fraser CM. 2000. DNA sequence of both chromosomes of the cholera pathogen *Vibrio cholerae*. *Nature* 406:477–483.
  35. Setubal JC, dos Santos P, Goldman BS, Ertesvåg H, Espin G, Rubio LM, Valla S, Almeida NF, Balasubramanian D, Cromes L, Curatti L, Du Z, Godsy E, Goodner B, Hellner-Burris K, Hernandez JA, Houmiel K, Imperial J, Kennedy C, Larson TJ, Latreille P, Ligon LS, Lu J, Maerk M, Miller NM, Norton S, O'Carroll IP, Paulsen I, Raulfs EC, Roemer R, Rosser J, Segura D, Slater S, Stricklin SL, Studholme DJ, Sun J, Viana CJ, Wallin E, Wang B, Wheeler C, Zhu H, Dean DR, Dixon R, Wood D. 2009. Genome sequence of *Azotobacter vinelandii*, an obligate aerobe specialized to support diverse anaerobic metabolic processes. *J Bacteriol* 191:4534–4545.
  36. Buell CR, Joardar V, Lindeberg M, Selengut J, Paulsen IT, Gwinn ML, Dodson RJ, Deboy RT, Durkin AS, Kolonay JF, Madupu R, Daugherty S, Brinkac L, Beanan MJ, Haft DH, Nelson WC, Davidsen T, Zafar N, Zhou L, Liu J, Yuan Q, Khouri H, Fedorova N, Tran B, Russell D, Berry K, Utterback T, Van Aken SE, Feldblyum TV, D'Ascenzo M, Deng W-L, Ramos AR, Alfano JR, Cartinhour S, Chatterjee AK, Delaney TP, Lazarowitz SG, Martin GB, Schneider DJ, Tang X, Bender CL, White O, Fraser CM, Collmer A. 2003. The complete genome sequence of the Arabidopsis and tomato pathogen *Pseudomonas syringae* pv. tomato DC3000. *Proc Natl Acad Sci U S A* 100:10181–10186.
  37. Silby MW, Cerdeño-Tárraga AM, Vernikos GS, Giddens SR, Jackson RW, Preston GM, Zhang X-X, Moon CD, Gehrig SM, Godfrey SAC, Knight CG, Malone JG, Robinson Z, Spiers AJ, Harris S, Challis GL, Yaxley AM, Harris D, Seeger K, Murphy L, Rutter S, Squares R, Quail MA, Saunders E, Mavromatis K, Brettin TS, Bentley SD, Hothersall J, Stephens E, Thomas CM, Parkhill J, Levy SB, Rainey PB, Thomson NR. 2009. Genomic and genetic analyses of diversity and plant interactions of *Pseudomonas fluorescens*. *Genome Biol* 10:R51.
  38. Belda E, van Heck RGA, José Lopez-Sanchez M, Cruveiller S, Barbe V, Fraser C, Klenk H-P, Petersen J, Morgat A, Nikel PI, Vallenet D, Rouy Z, Sekowska A, Martins Dos Santos VAP, de Lorenzo V, Danchin A, Médigue C. 2016. The revisited genome of *Pseudomonas putida* KT2440 enlightens its value as a robust metabolic chassis. *Environ Microbiol* 18:3403–3424.

39. Stover CK, Pham XQ, Erwin AL, Mizoguchi SD, Warren P, Hickey MJ, Brinkman FS, Hufnagle WO, Kowalik DJ, Lagrou M, Garber RL, Goltry L, Tolentino E, Westbrook-Wadman S, Yuan Y, Brody LL, Coulter SN, Folger KR, Kas A, Larbig K, Lim R, Smith K, Spencer D, Wong GK, Wu Z, Paulsen IT, Reizer J, Saier MH, Hancock RE, Lory S, Olson MV. 2000. Complete genome sequence of *Pseudomonas aeruginosa* PAO1, an opportunistic pathogen. *Nature* 406:959–964.
40. Bell KS, Sebaihia M, Pritchard L, Holden MTG, Hyman LJ, Holeva MC, Thomson NR, Bentley SD, Churcher LJC, Mungall K, Atkin R, Bason N, Brooks K, Chillingworth T, Clark K, Doggett J, Fraser A, Hance Z, Hauser H, Jagels K, Moule S, Norbertczak H, Ormond D, Price C, Quail MA, Sanders M, Walker D, Whitehead S, Salmond GPC, Birch PRJ, Parkhill J, Toth IK. 2004. Genome sequence of the enterobacterial phytopathogen *Erwinia carotovora* subsp. *atroseptica* and characterization of virulence factors. *Proc Natl Acad Sci U S A* 101:11105–11110.
41. Duchaud E, Rusniok C, Frangeul L, Buchrieser C, Givaudan A, Taourit S, Bocs S, Boursaux-Eude C, Chandler M, Charles J-F, Dassa E, Deroose R, Derzelle S, Freyssinet G, Gaudriault S, Médigue C, Lanois A, Powell K, Siguier P, Vincent R, Wingate V, Zouine M, Glaser P, Boemare N, Danchin A, Kunst F. 2003. The genome sequence of the entomopathogenic bacterium *Photorhabdus luminescens*. *Nat Biotechnol* 21:1307–1313.
42. Chain PSG, Hu P, Malfatti SA, Radnedge L, Larimer F, Vergez LM, Worsham P, Chu MC, Andersen GL. 2006. Complete genome sequence of *Yersinia pestis* strains Antiqua and Nepal516: evidence of gene reduction in an emerging pathogen. *J Bacteriol* 188:4453–4463.
43. Müller H, Fürnkranz M, Grube M, Berg G. 2013. Genome Sequence of *Serratia plymuthica* Strain S13, an Endophyte with Germination- and Plant-Growth-Promoting Activity from the Flower of Styrian Oil Pumpkin. *Genome Announc* 1:e00594-13.
44. McClelland M, Sanderson KE, Spieth J, Clifton SW, Latreille P, Courtney L, Porwollik S, Ali J, Dante M, Du F, Hou S, Layman D, Leonard S, Nguyen C, Scott K, Holmes A, Grewal N, Mulvaney E, Ryan E, Sun H, Florea L, Miller W, Stoneking T, Nhan M, Waterston R, Wilson RK. 2001. Complete genome sequence of *Salmonella enterica* serovar Typhimurium LT2. *Nature* 413:852–856.
45. Blattner FR, Plunkett G, Bloch CA, Perna NT, Burland V, Riley M, Collado-Vides J, Glasner JD, Rode CK, Mayhew GF, Gregor J, Davis NW, Kirkpatrick HA, Goeden MA, Rose DJ, Mau B, Shao Y. 1997. The complete genome sequence of *Escherichia coli* K-12. *Science* 277:1453–1462.
46. Liu P, Li P, Jiang X, Bi D, Xie Y, Tai C, Deng Z, Rajakumar K, Ou H-Y. 2012. Complete genome sequence of *Klebsiella pneumoniae* subsp. *pneumoniae* HS11286, a multidrug-resistant strain isolated from human sputum. *J Bacteriol* 194:1841–1842.



**Table S2) The SBP repertoire of the 49 bacterial model strains.**

lignad family correctly predicted by TransportDB

ligand family not correctly predicted by TransportDB

single lignad predicted and experimentally determined ligands belong to the ligand family of the predicted compound

predicted ligand family is similar to the family of experimentally determined ligand(s)

| <b><i>Rhodobacter sphaeroides</i> ATCC 17025</b> |                   |             |                                                |                                          |                                       |
|--------------------------------------------------|-------------------|-------------|------------------------------------------------|------------------------------------------|---------------------------------------|
| Number of ORFs in the proteome: 4208             |                   |             |                                                |                                          |                                       |
| Number of SBPs: 78 (1.85% of total)              |                   |             |                                                |                                          |                                       |
| Lifestyle Summary: FRESH/MARINE WATERS           |                   |             |                                                |                                          |                                       |
| <b>SeqID</b>                                     | <b>Gene Locus</b> | <b>Pfam</b> | <b>Ligand prediction by TransportDB</b>        | <b>Experimentally identified ligands</b> | <b>References/pdb accession codes</b> |
| A4WVU2                                           | Rsph17025_2619    | PF13407     | xylose                                         |                                          |                                       |
| A4WP86                                           | Rsph17025_0290    | PF16868     | phosphonates                                   |                                          |                                       |
| A4WWG6                                           | Rsph17025_2844    | PF00496     | dipeptide/oligopeptide                         |                                          |                                       |
| A4WSS3                                           | Rsph17025_1543    | PF03480     | C4-dicarboxylate                               |                                          |                                       |
| A4X0L4                                           | Rsph17025_4333    | PF03180     | methionine                                     |                                          |                                       |
| A4WWG5                                           | Rsph17025_2843    | PF00496     | dipeptide/oligopeptide                         |                                          |                                       |
| A4WUI2                                           | Rsph17025_2156    | PF00496     | dipeptide/oligopeptide                         |                                          |                                       |
| A4WSB1                                           | Rsph17025_1378    | PF13416     | spermidine/putrescine                          |                                          |                                       |
| A4WYU1                                           | Rsph17025_3688    | PF16868     | phosphonate                                    |                                          |                                       |
| A4WQM8                                           | Rsph17025_0786    | PF03180     | methionine                                     |                                          |                                       |
| A4WYI9                                           | Rsph17025_3584    | PF13416     | sugar                                          |                                          |                                       |
| A4WXN7                                           | Rsph17025_3267    | PF16868     | Unclassified                                   |                                          |                                       |
| A4WP45                                           | Rsph17025_0249    | PF01297     | manganese/zinc ion                             |                                          |                                       |
| A4WSN6                                           | Rsph17025_1506    | PF00496     | oligopeptide                                   |                                          |                                       |
| A4WXX2                                           | Rsph17025_3355    | PF13407     | rhamnose                                       |                                          |                                       |
| A4WWF0                                           | Rsph17025_2828    | PF04069     | glycine betaine                                |                                          |                                       |
| A4WR14                                           | Rsph17025_0926    | PF13458     | leucine/valine                                 |                                          |                                       |
| A4WZK3                                           | Rsph17025_3963    | PF00496     | dipeptide/oligopeptide                         |                                          |                                       |
| A4WVH7                                           | Rsph17025_2503    | PF00497     | amino acid<br>(glutamine/glutamate/aspartate?) |                                          |                                       |

|        |                |         |                                                |  |  |
|--------|----------------|---------|------------------------------------------------|--|--|
| A4WU89 | Rsph17025_2062 | PF00497 | amino acid<br>(glutamine/glutamate/aspartate?) |  |  |
| A4WYH5 | Rsph17025_3570 | PF03480 | C4-dicarboxylate                               |  |  |
| A4WWL2 | Rsph17025_2890 | PF00496 | oligopeptide                                   |  |  |
| A4WXV8 | Rsph17025_3341 | PF03480 | C4-dicarboxylate                               |  |  |
| A4WUY8 | Rsph17025_2313 | PF04069 | choline                                        |  |  |
| A4WXN8 | Rsph17025_3268 | PF13458 | urea                                           |  |  |
| A4WQ28 | Rsph17025_0586 | PF09084 | nitrate/sulfonate/taurine                      |  |  |
| A4WQK6 | Rsph17025_0764 | PF09084 | nitrate/sulfonate/taurine                      |  |  |
| A4WSH6 | Rsph17025_1446 | PF13416 | spermidine/putrescine                          |  |  |
| A4WQJ3 | Rsph17025_0751 | PF09084 | nitrate/sulfonate/taurine                      |  |  |
| A4WSB6 | Rsph17025_1383 | PF01497 | iron-hydroxamate                               |  |  |
| A4WP30 | Rsph17025_0234 | PF13407 | ribose                                         |  |  |
| A4WTV3 | Rsph17025_1926 | PF09084 | nitrate/sulfonate/taurine                      |  |  |
| A4WS65 | Rsph17025_1330 | PF13416 | spermidine/putrescine                          |  |  |
| A4WSJ6 | Rsph17025_1466 | PF09084 | nitrate/sulfonate/taurine                      |  |  |
| A4WXE1 | Rsph17025_3171 | PF00497 | amino acid<br>(glutamine/glutamate/aspartate?) |  |  |
| A4WTX0 | Rsph17025_1943 | PF00497 | amino acid<br>(glutamine/glutamate/aspartate?) |  |  |
| A4WQK5 | Rsph17025_0763 | PF09084 | glycine betaine                                |  |  |
| A4WPW8 | Rsph17025_0526 | PF00496 | oligopeptide                                   |  |  |
| A4WXU8 | Rsph17025_3331 | PF01497 | iron-hydroxamate                               |  |  |
| A4WXQ5 | Rsph17025_3285 | PF13416 | sugar                                          |  |  |
| A4WP39 | Rsph17025_0243 | PF03480 | C4-dicarboxylate                               |  |  |
| A4WRN4 | Rsph17025_1147 | PF01547 | sugar                                          |  |  |
| A4WXR2 | Rsph17025_3292 | PF13458 | urea                                           |  |  |
| A4WPG4 | Rsph17025_0372 | PF00496 | dipeptide/oligopeptide                         |  |  |
| A4WXT9 | Rsph17025_3320 | PF05048 | Not annotated in TransportDB                   |  |  |
| A4WZI2 | Rsph17025_3942 | PF02608 | sugar                                          |  |  |
| A4WT60 | Rsph17025_1681 | PF01547 | sugar                                          |  |  |
| A4WW44 | Rsph17025_2721 | PF13458 | urea                                           |  |  |
| A4WW08 | Rsph17025_2685 | PF13407 | xylose                                         |  |  |

|                                      |                |         |                                                |  |  |
|--------------------------------------|----------------|---------|------------------------------------------------|--|--|
| A4X0E7                               | Rsph17025_4264 | PF01497 | iron-hydroxamate                               |  |  |
| A4WXM8                               | Rsph17025_3258 | PF03480 | C4-dicarboxylate                               |  |  |
| A4WTU6                               | Rsph17025_1919 | PF12849 | phosphate                                      |  |  |
| A4WYQ5                               | Rsph17025_3651 | PF01547 | sugar                                          |  |  |
| A4WUP7                               | Rsph17025_2221 | PF13458 | leucine/valine                                 |  |  |
| A4WXC1                               | Rsph17025_3151 | PF01297 | zinc ion                                       |  |  |
| A4WUV8                               | Rsph17025_2282 | PF02608 | sugar                                          |  |  |
| A4WZE2                               | Rsph17025_3901 | PF13458 | urea                                           |  |  |
| A4WYF8                               | Rsph17025_3553 | PF13416 | sugar                                          |  |  |
| A4WR38                               | Rsph17025_0951 | PF02608 | sugar                                          |  |  |
| A4WXC9                               | Rsph17025_3159 | PF13416 | iron(III)                                      |  |  |
| A4WT65                               | Rsph17025_1686 | PF03480 | C4-dicarboxylate                               |  |  |
| A4WQM5                               | Rsph17025_0783 | PF03180 | methionine                                     |  |  |
| A4WPR2                               | Rsph17025_0470 | PF13458 | leucine/valine                                 |  |  |
| A4WXR5                               | Rsph17025_3295 | PF16868 | phosphonates                                   |  |  |
| A4WV85                               | Rsph17025_2411 | PF03480 | C4-dicarboxylate                               |  |  |
| A4WZ00                               | Rsph17025_3750 | PF03180 | methionine                                     |  |  |
| A4WQV8                               | Rsph17025_0869 | PF00497 | amino acid<br>(glutamine/glutamate/aspartate?) |  |  |
| A4WU71                               | Rsph17025_2044 | PF03480 | C4-dicarboxylate                               |  |  |
| A4WWU7                               | Rsph17025_2975 | PF09084 | nitrate/sulfonate/taurine                      |  |  |
| A4WSY8                               | Rsph17025_1609 | PF03480 | C4-dicarboxylate                               |  |  |
| A4WQL9                               | Rsph17025_0777 | PF09084 | nitrate/sulfonate/taurine                      |  |  |
| A4WSS2                               | Rsph17025_1542 | PF03480 | C4-dicarboxylate                               |  |  |
| A4WY04                               | Rsph17025_3391 | PF00496 | dipeptide/oligopeptide                         |  |  |
| A4WTW8                               | Rsph17025_1941 | PF13458 | leucine/valine                                 |  |  |
| A4WZA8                               | Rsph17025_3867 | PF03480 | C4-dicarboxylate                               |  |  |
| A4WST0                               | Rsph17025_1550 | PF03480 | C4-dicarboxylate                               |  |  |
| A4WXP5                               | Rsph17025_3275 | PF00496 | dipeptide/oligopeptide                         |  |  |
| A4WQA9                               | Rsph17025_0667 | PF13416 | spermidine/putrescine                          |  |  |
|                                      |                |         |                                                |  |  |
| <b>Neisseria meningitidis MC58</b>   |                |         |                                                |  |  |
| Number of ORFs in the proteome: 2001 |                |         |                                                |  |  |

| Number of SBPs: 11 (0.55% of total)      |            |           |                                                |                                   |                                |
|------------------------------------------|------------|-----------|------------------------------------------------|-----------------------------------|--------------------------------|
| Lifestyle Summary: HUMAN/ANIMAL PATHOGEN |            |           |                                                |                                   |                                |
| SeqID                                    | Gene Locus | Pfam Code | Ligand prediction by TransportDB               | Experimentally identified ligands | References/pdb accession codes |
| P0A0Y4                                   | NMB0634    | PF01547   | iron(III)                                      |                                   |                                |
| Q9JYG7                                   | NMB1594    | PF13416   | spermidine/putrescine                          |                                   |                                |
| Q9K0L5                                   | NMB0578    | PF05048   | Not annotated in TransportDB                   |                                   |                                |
| Q9K0K8                                   | NMB0586    | PF01297   | manganese/zinc ion                             |                                   |                                |
| Q9K0H8                                   | NMB0623    | PF13416   | spermidine/putrescine                          |                                   |                                |
| Q9K0U8                                   | NMB0462    | PF13416   | spermidine/putrescine                          |                                   |                                |
| Q9JYF0                                   | NMB1612    | PF00497   | amino acid<br>(glutamine/glutamate/aspartate?) |                                   |                                |
| Q9K035                                   | NMB0787    | PF00497   | amino acid<br>(glutamine/glutamate/aspartate?) |                                   |                                |
| Q7DD63                                   | NMB1946    | PF03180   | methionine                                     |                                   |                                |
| Q9JXU5                                   | NMB1880    | PF01497   | iron-hydroxamate                               |                                   |                                |
| Q9JXL2                                   | NMB1989    | PF01497   | iron-hydroxamate                               |                                   |                                |
|                                          |            |           |                                                |                                   |                                |
| <b><i>Helicobacter pylori</i> 26695</b>  |            |           |                                                |                                   |                                |
| Number of ORFs in the proteome: 1552     |            |           |                                                |                                   |                                |
| Number of SBPs: 7 (0.45% of total)       |            |           |                                                |                                   |                                |
| Lifestyle Summary: HUMAN/ANIMAL PATHOGEN |            |           |                                                |                                   |                                |
| SeqID                                    | Gene Locus | Pfam Code | Ligand prediction by TransportDB               | Experimentally identified ligands | References/pdb accession codes |
| O25845                                   | HP_1252    | PF00496   | oligopeptide                                   |                                   |                                |
| O26084                                   | HP_1564    | PF03180   | methionine                                     |                                   |                                |
| O25786                                   | HP_1172    | PF00497   | amino acid<br>(glutamine/glutamate/aspartate?) |                                   |                                |
| O26083                                   | HP_1562    | PF01497   | iron-hydroxamate                               |                                   |                                |
| O25069                                   | HP_0298    | PF00496   | dipeptide/oligopeptide                         |                                   |                                |
| O26082                                   | HP_1561    | PF01497   | iron-hydroxamate                               |                                   |                                |
| O25594                                   | HP_0940    | PF00497   | amino acid<br>(glutamine/glutamate/aspartate?) |                                   |                                |

| <b><i>Chlamydia trachomatis</i> D/UW-3/CX</b> |            |           |                                                |                                                                           |                                     |
|-----------------------------------------------|------------|-----------|------------------------------------------------|---------------------------------------------------------------------------|-------------------------------------|
| Number of ORFs in the proteome: 895           |            |           |                                                |                                                                           |                                     |
| Number of SBPs: 9 (1.01% of total)            |            |           |                                                |                                                                           |                                     |
| Lifestyle Summary: HUMAN/ANIMAL PATHOGEN      |            |           |                                                |                                                                           |                                     |
| SeqID                                         | Gene Locus | Pfam Code | Ligand prediction by TransportDB               | Experimentally identified ligands                                         | References/pdb accession codes      |
| Q9S529                                        | CT_067     | PF01297   | manganese/zinc ion                             | Fe <sup>3+</sup> , Mn <sup>2+</sup> , Ni <sup>2+</sup> , Fe <sup>2+</sup> | PDB: 6NSI; DOI: 10.1128/JB.00580-19 |
| O84420                                        | CT_415     | PF01297   | manganese/zinc ion                             |                                                                           |                                     |
| O84385                                        | CT_381     | PF00497   | amino acid<br>(glutamine/glutamate/aspartate?) | Arginine                                                                  | DOI: 10.1074/jbc.M110.118513        |
| O84396                                        | CT_391     | PF04392   | Unclassified                                   |                                                                           |                                     |
| O84178                                        | CT_175     | PF00496   | oligopeptide                                   |                                                                           |                                     |
| O84493                                        | CT_486     | PF00497   | amino acid<br>(glutamine/glutamate/aspartate?) |                                                                           |                                     |
| O84201                                        | CT_198     | PF00496   | oligopeptide                                   |                                                                           |                                     |
| O84486                                        | CT_480     | PF00496   | dipeptide/oligopeptide                         |                                                                           |                                     |
| O84141                                        | CT_139     | PF00496   | dipeptide/oligopeptide                         |                                                                           |                                     |
| <b><i>Pseudomonas putida</i> KT2440</b>       |            |           |                                                |                                                                           |                                     |
| Number of ORFs in the proteome: 5527          |            |           |                                                |                                                                           |                                     |
| Number of SBPs: 85 (1.54% of total)           |            |           |                                                |                                                                           |                                     |
| Lifestyle Summary: SOIL                       |            |           |                                                |                                                                           |                                     |
| SeqID                                         | Gene Locus | Pfam Code | Ligand prediction by TransportDB               | Experimentally identified ligands                                         | References/pdb accession codes      |
| Q88DF8                                        | PP_4867    | PF13458   | leucine/valine                                 |                                                                           |                                     |
| Q88DS5                                        | PP_4748    | PF00497   | amino acid<br>(glutamine/glutamate/aspartate?) |                                                                           |                                     |
| Q88Q41                                        | PP_0657    | PF00497   | amino acid<br>(glutamine/glutamate/aspartate?) |                                                                           |                                     |
| Q88KM6                                        | PP_2264    | PF13416   | sugar                                          |                                                                           |                                     |
| Q88Q76                                        | PP_0619    | PF13458   | urea                                           |                                                                           |                                     |

|        |         |         |                                                |  |  |
|--------|---------|---------|------------------------------------------------|--|--|
| Q88CK0 | PP_5180 | PF13416 | spermidine/putrescine                          |  |  |
| Q88H37 | PP_3528 | PF09084 | glycine betaine                                |  |  |
| Q88N00 | PP_1418 | PF03401 | tricarboxylate                                 |  |  |
| Q88CJ9 | PP_5181 | PF13416 | spermidine/putrescine                          |  |  |
| Q88K38 | PP_2454 | PF13407 | ribose                                         |  |  |
| Q88P38 | PP_1015 | PF13416 | sugar                                          |  |  |
| Q88HY0 | PP_3223 | PF00496 | dipeptide/oligopeptide                         |  |  |
| Q88RQ3 | PP_0076 | PF04069 | choline                                        |  |  |
| Q88RA0 | PP_0233 | PF09084 | glycine betaine                                |  |  |
| Q88FF1 | PP_4146 | PF00496 | oligopeptide                                   |  |  |
| Q88RB2 | PP_0221 | PF03180 | methionine                                     |  |  |
| Q88KB8 | PP_2372 | PF13407 | ribose                                         |  |  |
| Q88CM3 | PP_5157 | PF00497 | amino acid<br>(glutamine/glutamate/aspartate?) |  |  |
| Q88QS6 | PP_0412 | PF13416 | spermidine/putrescine                          |  |  |
| Q88HY6 | PP_3217 | PF09084 | nitrate/sulfonate/taurine                      |  |  |
| Q88CL5 | PP_5165 | PF03180 | methionine                                     |  |  |
| Q88RA6 | PP_0227 | PF00497 | amino acid<br>(glutamine/glutamate/aspartate?) |  |  |
| Q88FX3 | PP_3954 | PF16868 | Unclassified                                   |  |  |
| Q88MT2 | PP_1486 | PF13416 | spermidine/putrescine                          |  |  |
| Q88PG5 | PP_0885 | PF00496 | dipeptide/oligopeptide                         |  |  |
| Q88C54 | PP_5329 | PF12849 | phosphate                                      |  |  |
| Q88R96 | PP_0237 | PF09084 | glycine betaine                                |  |  |
| Q88HX4 | PP_3229 | PF09084 | nitrate/sulfonate/taurine                      |  |  |
| Q88J92 | PP_2757 | PF13407 | ribose                                         |  |  |
| Q88FF0 | PP_4147 | PF00496 | oligopeptide                                   |  |  |
| Q88GC3 | PP_3801 | PF01297 | manganese/zinc ion                             |  |  |
| Q88PG6 | PP_0884 | PF00496 | dipeptide/oligopeptide                         |  |  |
| Q88JJ3 | PP_2656 | PF12849 | phosphate                                      |  |  |
| Q88J91 | PP_2758 | PF13407 | ribose                                         |  |  |
| Q88I54 | PP_3147 | PF13416 | spermidine/putrescine                          |  |  |
| Q88H07 | PP_3558 | PF04069 | glycine betaine                                |  |  |

|        |         |         |                                                |  |  |
|--------|---------|---------|------------------------------------------------|--|--|
| Q88F29 | PP_4270 | PF00497 | amino acid<br>(glutamine/glutamate/aspartate?) |  |  |
| Q88IX9 | PP_2870 | PF13416 | spermidine/putrescine                          |  |  |
| Q88JQ8 | PP_2591 | PF01497 | iron-hydroxamate                               |  |  |
| Q88PI0 | PP_0870 | PF04069 | glycine betaine                                |  |  |
| Q88NY2 | PP_1071 | PF00497 | amino acid<br>(glutamine/glutamate/aspartate?) |  |  |
| Q88QG9 | PP_0524 | PF01497 | iron-hydroxamate                               |  |  |
| Q88N87 | PP_1325 | PF04348 | Not annotated in TransportDB                   |  |  |
| Q88RK9 | PP_0120 | PF01297 | zinc ion                                       |  |  |
| Q88HL4 | PP_3342 | PF00496 | nickel                                         |  |  |
| Q88GB0 | PP_3814 | PF13416 | spermidine/putrescine                          |  |  |
| Q88NB5 | PP_1297 | PF00497 | amino acid<br>(glutamine/glutamate/aspartate?) |  |  |
| Q88R38 | PP_0296 | PF04069 | choline                                        |  |  |
| Q88D05 | PP_5024 | PF00497 | amino acid<br>(glutamine/glutamate/aspartate?) |  |  |
| Q88IC1 | PP_3078 | PF00496 | oligopeptide                                   |  |  |
| Q88D72 | PP_4955 | PF00497 | amino acid<br>(glutamine/glutamate/aspartate?) |  |  |
| Q88K73 | PP_2418 | PF01497 | cobalamin                                      |  |  |
| Q88G80 | PP_3845 | PF13416 | spermidine/putrescine                          |  |  |
| Q88EH7 | PP_4486 | PF00497 | amino acid<br>(glutamine/glutamate/aspartate?) |  |  |
| Q88NR4 | PP_1141 | PF13458 | leucine/valine                                 |  |  |
| Q88GX4 | PP_3593 | PF00497 | amino acid<br>(glutamine/glutamate/aspartate?) |  |  |
| Q88C42 | PP_5341 | PF13416 | spermidine/putrescine                          |  |  |
| Q88PH7 | PP_0873 | PF13416 | spermidine/putrescine                          |  |  |
| Q88HY9 | PP_3213 | PF09084 | nitrate/sulfonate/taurine                      |  |  |
| Q88J74 | PP_2775 | PF04069 | glycine betaine                                |  |  |
| Q88R30 | PP_0304 | PF04069 | choline                                        |  |  |
| Q88RL7 | PP_0112 | PF03180 | methionine                                     |  |  |

|           |         |         |                                                |  |  |
|-----------|---------|---------|------------------------------------------------|--|--|
| Q88EM6    | PP_4428 | PF00497 | amino acid<br>(glutamine/glutamate/aspartate?) |  |  |
| Q88DX9    | PP_4689 | PF01497 | iron-hydroxamate                               |  |  |
| Q88R52    | PP_0282 | PF00497 | amino acid<br>(glutamine/glutamate/aspartate?) |  |  |
| Q88C98    | PP_5283 | PF00496 | dipeptide/oligopeptide                         |  |  |
| Q88EK4    | PP_4458 | PF00496 | dipeptide/oligopeptide                         |  |  |
| Q88D49    | PP_4979 | PF00497 | amino acid<br>(glutamine/glutamate/aspartate?) |  |  |
| Q88J97    | PP_2752 | PF13458 | leucine/valine                                 |  |  |
| Q88QH2    | PP_0521 | PF00497 | amino acid<br>(glutamine/glutamate/aspartate?) |  |  |
| Q88PG8    | PP_0882 | PF00496 | dipeptide/oligopeptide                         |  |  |
| Q88J79    | PP_2770 | PF13458 | branched-chain amino acid                      |  |  |
| Q88GU3    | PP_3624 | PF00497 | amino acid<br>(glutamine/glutamate/aspartate?) |  |  |
| Q88GJ3    | PP_3729 | PF00497 | amino acid<br>(glutamine/glutamate/aspartate?) |  |  |
| Q88M34    | PP_1741 | PF04069 | glycine betaine                                |  |  |
| Q88HX5    | PP_3228 | PF09084 | nitrate/sulfonate/taurine                      |  |  |
| Q88KU4    | PP_2195 | PF13416 | spermidine/putrescine                          |  |  |
| Q88NN8    | PP_1169 | PF03480 | C4-dicarboxylate                               |  |  |
| Q88F98    | PP_4200 | PF00497 | amino acid<br>(glutamine/glutamate/aspartate?) |  |  |
| Q88F53    | PP_4246 | PF00497 | amino acid<br>(glutamine/glutamate/aspartate?) |  |  |
| Q88GC0    | PP_3804 | PF01297 | manganese/zinc ion                             |  |  |
| Q88J98    | PP_2751 | PF13458 | leucine/valine                                 |  |  |
| Q88GK2    | PP_3719 | PF13416 | spermidine/putrescine                          |  |  |
| A0A140FW9 | PP_5538 | PF13458 | leucine/valine                                 |  |  |
| Q88JH3    | PP_2676 | PF00497 | amino acid<br>(glutamine/glutamate/aspartate?) |  |  |
|           |         |         |                                                |  |  |



| <b>Vibrio cholerae O1 biovar El Tor str. N16961</b> |            |           |                                                |                                                                                                 |                                            |
|-----------------------------------------------------|------------|-----------|------------------------------------------------|-------------------------------------------------------------------------------------------------|--------------------------------------------|
| Number of ORFs in the proteome: 3782                |            |           |                                                |                                                                                                 |                                            |
| Number of SBPs: 51 (1.35% of total)                 |            |           |                                                |                                                                                                 |                                            |
| Lifestyle Summary: HUMAN/ANIMAL PATHOGEN            |            |           |                                                |                                                                                                 |                                            |
| SeqID                                               | Gene Locus | Pfam Code | Ligand prediction by TransportDB               | Experimentally identified ligands                                                               | References/pdb accession codes             |
| Q9KR64                                              | VC_1779    | PF03480   | C4-dicarboxylate                               | Sialic acid                                                                                     | DOI: 10.1074/jbc.M111.281030;<br>PDB: 5LTC |
| Q9KTJ7                                              | VC_0905    | PF03180   | methionine                                     |                                                                                                 |                                            |
| Q9KUE0                                              | VC_0581    | PF04348   | leucine/valine                                 |                                                                                                 |                                            |
| Q9KU25                                              | VC_0704    | PF13416   | spermidine/putrescine                          | Norspermidine                                                                                   | DOI: 10.1128/JB.187.21.7434-7443.2005      |
| Q9KQR9                                              | VC_1929    | PF03480   | C4-dicarboxylate                               | Sialic acid                                                                                     | DOI: 10.1099/mic.0.059659-0                |
| Q9KCLK6                                             | VC_A0737   | PF13407   | xylose                                         |                                                                                                 |                                            |
| Q9KPI6                                              | VC_2381    | PF01497   | iron-hydroxamate                               |                                                                                                 |                                            |
| Q9KUA3                                              | VC_0620    | PF00496   | dipeptide/oligopeptide                         | Chitin, 2-acetamido-2-deoxy-beta-D-glucopyranose-(1-4)-2-acetamido-2-deoxy-beta-D-glucopyranose | PDB: 1ZU0, 4GFR,                           |
| Q9KS97                                              | VC_1362    | PF00497   | amino acid<br>(glutamine/glutamate/aspartate?) |                                                                                                 |                                            |
| Q9KUT5                                              | VC_0430    | PF16868   | glycine betaine                                |                                                                                                 |                                            |
| Q9KKR3                                              | VC_A1039   | PF00497   | amino acid<br>(glutamine/glutamate/aspartate?) |                                                                                                 |                                            |
| Q9KVE4                                              | VC_0202    | PF01497   | iron-hydroxamate                               |                                                                                                 |                                            |
| Q9KKK6                                              | VC_A1098   | PF00496   | dipeptide/oligopeptide                         |                                                                                                 |                                            |
| Q9KT04                                              | VC_1101    | PF04392   | Unclassified                                   | Phenylalanine                                                                                   | PDB: 3LKV                                  |
| Q9KS36                                              | VC_1425    | PF13416   | spermidine/putrescine                          |                                                                                                 |                                            |
| Q9KRG2                                              | VC_1680    | PF00496   | oligopeptide                                   |                                                                                                 |                                            |
| Q9KS37                                              | VC_1424    | PF13416   | spermidine/putrescine                          |                                                                                                 |                                            |
| Q9KN35                                              | VC_A0130   | PF13407   | ribose                                         |                                                                                                 |                                            |
| Q9KN95                                              | VC_A0070   | PF12849   | phosphate                                      |                                                                                                 |                                            |

|        |          |         |                                                |              |                                    |
|--------|----------|---------|------------------------------------------------|--------------|------------------------------------|
| Q9KN22 | VC_A0144 | PF16868 | phosphonates                                   |              |                                    |
| Q9KM06 | VC_A0583 | PF00497 | amino acid<br>(glutamine/glutamate/aspartate?) |              |                                    |
| Q9KRT7 | VC_1549  | PF13416 | sugar                                          |              |                                    |
| Q9KT14 | VC_1091  | PF00496 | oligopeptide                                   |              |                                    |
| Q9KKR8 | VC_A1033 | PF01547 | sugar                                          |              |                                    |
| Q9KVX8 | VC_0010  | PF00497 | amino acid<br>(glutamine/glutamate/aspartate?) |              |                                    |
| H9L4S6 | VC_0776  | PF01497 | iron-hydroxamate                               |              |                                    |
| Q9KS90 | VC_1369  | PF09084 | nitrate/sulfonate/taurine                      |              |                                    |
| Q9KQB9 | VC_2081  | PF01297 | zinc                                           |              |                                    |
| Q9KRH8 | VC_1664  | PF13416 | spermidine/putrescine                          |              |                                    |
| Q9KSI3 | VC_1273  | PF03480 | C4-dicarboxylate                               |              |                                    |
| Q9KLN3 | VC_A0710 | PF00532 | trimethylamine N-oxide                         |              |                                    |
| Q9KRN3 | VC_1603  | PF00497 | Unclassified                                   |              |                                    |
| Q9KKJ4 | VC_A1113 | PF13416 | spermidine/putrescine                          |              |                                    |
| Q9KLD9 | VC_A0807 | PF12727 | phosphate                                      |              |                                    |
| Q9KLZ8 | VC_A0591 | PF00496 | oligopeptide                                   |              |                                    |
| Q9KSD3 | VC_1325  | PF13407 | xylose                                         |              |                                    |
| Q9KMU2 | VC_A0227 | PF01497 | iron-hydroxamate                               | Enterobactin | DOI: 10.1016/j.febslet.2012.03.043 |
| Q9KSC4 | VC_1334  | PF03401 | tricarboxylate                                 |              |                                    |
| Q9KKW9 | VC_A0981 | PF00497 | amino acid<br>(glutamine/glutamate/aspartate?) |              |                                    |
| Q9KRW1 | VC_1523  | PF12849 | tungsten                                       |              |                                    |
| Q9KL05 | VC_A0945 | PF13416 | sugar (maltose?)                               |              |                                    |
| Q9KKX2 | VC_A0978 | PF00497 | amino acid<br>(glutamine/glutamate/aspartate?) |              |                                    |
| Q9KU09 | VC_0721  | PF12849 | phosphate                                      |              |                                    |
| Q9KNV8 | VC_2622  | PF00497 | amino acid<br>(glutamine/glutamate/aspartate?) |              |                                    |
| Q9KVH5 | VC_0171  | PF00496 | dipeptide/oligopeptide                         |              |                                    |

| Q9KLI5                                    | VC_A0759   | PF00497   | amino acid<br>(glutamine/glutamate/aspartate?) |                                   |                                              |
|-------------------------------------------|------------|-----------|------------------------------------------------|-----------------------------------|----------------------------------------------|
| Q9KL36                                    | VC_A0913   | PF01497   | iron-hydroxamate                               |                                   |                                              |
| Q9KRN8                                    | VC_1598    | PF00497   | amino acid<br>(glutamine/glutamate/aspartate?) |                                   |                                              |
| Q9KUM7                                    | VC_0488    | PF03480   | C4-dicarboxylate                               |                                   |                                              |
| Q9KRV6                                    | VC_1528    | PF00497   | Unclassified                                   |                                   |                                              |
| Q9KQY4                                    | VC_1863    | PF00497   | amino acid<br>(glutamine/glutamate/aspartate?) |                                   |                                              |
| <b><i>Streptococcus pneumoniae</i> R6</b> |            |           |                                                |                                   |                                              |
| Number of ORFs in the proteome: 2030      |            |           |                                                |                                   |                                              |
| Number of SBPs: 28 (1.38% of total)       |            |           |                                                |                                   |                                              |
| Lifestyle Summary: HUMAN/ANIMAL PATHOGEN  |            |           |                                                |                                   |                                              |
| SeqID                                     | Gene Locus | Pfam Code | Ligand prediction by TransportDB               | Experimentally identified ligands | References/pdb accession codes               |
| P0A4G3                                    | spr1494    | PF01297   | zinc                                           |                                   |                                              |
| Q8DPB1                                    | spr1257    | PF12849   | phosphate                                      |                                   |                                              |
| Q8DN64                                    | spr1895    | PF12849   | phosphate                                      |                                   |                                              |
| P0A4G1                                    | spr1382    | PF00496   | oligopeptide                                   |                                   |                                              |
| P59214                                    | spr1918    | PF13416   | sugar (maltose?)                               |                                   |                                              |
| Q8DMZ7                                    | spr2003    | PF09084   | nitrate/sulfonate/taurine                      |                                   |                                              |
| Q8DQC2                                    | spr0747    | PF02608   | sugar                                          |                                   |                                              |
| Q8DQ09                                    | spr0906    | PF01297   | zinc                                           | Zinc                              | DOI: 10.1016/j.jmb.2008.05.068;<br>PDB: 3CX3 |
| Q8DP50                                    | spr1353    | PF00497   | amino acid<br>(glutamine/glutamate/aspartate?) |                                   |                                              |
| Q8DRI6                                    | spr0101    | PF00497   | amino acid<br>(glutamine/glutamate/aspartate?) |                                   |                                              |
| Q8DRG2                                    | spr0146    | PF00497   | amino acid<br>(glutamine/glutamate/aspartate?) | Glutathione                       | PDB: 4EQ9                                    |
| Q8DQL3                                    | spr0620    | PF00497   | amino acid<br>(glutamine/glutamate/aspartate?) |                                   |                                              |

| Q8DPF2                                                                             | spr1194    | PF00496   | dipeptide/oligopeptide                         |                                   |                                |
|------------------------------------------------------------------------------------|------------|-----------|------------------------------------------------|-----------------------------------|--------------------------------|
| Q8DNH8                                                                             | spr1712    | PF13416   | sugar                                          |                                   |                                |
| Q8CWT0                                                                             | spr0545    | PF00497   | amino acid<br>(glutamine/glutamate/aspartate?) |                                   |                                |
| Q8DPC5                                                                             | spr1243    | PF13416   | spermidine/putrescine                          |                                   |                                |
| Q8DPY6                                                                             | spr0934    | PF01497   | iron-hydroxamate                               | Bis, tris- propane                | PDB: 4H59                      |
| Q8DNJ2                                                                             | spr1687    | PF01497   | iron-hydroxamate                               |                                   |                                |
| Q8CWT1                                                                             | spr0534    | PF00497   | amino acid<br>(glutamine/glutamate/aspartate?) |                                   |                                |
| Q8DNI1                                                                             | spr1707    | PF00496   | oligopeptide                                   |                                   |                                |
| Q8DNU2                                                                             | spr1534    | PF01547   | sugar                                          |                                   |                                |
| Q8DPW4                                                                             | spr0975    | PF04392   | Unclassified                                   |                                   |                                |
| Q8DNU8                                                                             | spr1527    | PF13416   | sugar                                          |                                   |                                |
| Q8DQI1                                                                             | spr0659    | PF13458   | leucine/valine                                 |                                   |                                |
| Q8DRG1                                                                             | spr0147    | PF03180   | methionine                                     |                                   |                                |
| Q8DNN7                                                                             | spr1620    | PF13416   | sugar                                          |                                   |                                |
| Q8DR61                                                                             | spr0327    | PF00496   | oligopeptide                                   |                                   |                                |
| Q8DPB7                                                                             | spr1251    | PF00497   | amino acid<br>(glutamine/glutamate/aspartate?) |                                   |                                |
|                                                                                    |            |           |                                                |                                   |                                |
| <b><i>Legionella pneumophila</i> subsp. <i>pneumophila</i> str. Philadelphia-1</b> |            |           |                                                |                                   |                                |
| Number of ORFs in the proteome: 2930                                               |            |           |                                                |                                   |                                |
| Number of SBPs: 15 (0.51% of total)                                                |            |           |                                                |                                   |                                |
| Lifestyle Summary: HUMAN/ANIMAL PATHOGEN                                           |            |           |                                                |                                   |                                |
| SeqID                                                                              | Gene Locus | Pfam Code | Ligand prediction by TransportDB               | Experimentally identified ligands | References/pdb accession codes |
| Q5ZR88                                                                             | lpg2995    | PF04348   | leucine/valine                                 |                                   |                                |
| Q5ZZH3                                                                             | lpg0037    | PF00497   | amino acid<br>(glutamine/glutamate/aspartate?) |                                   |                                |
| Q5ZY81                                                                             | lpg0491    | PF00497   | Unclassified                                   |                                   |                                |
| Q5ZWG0                                                                             | lpg1125    | PF00497   | amino acid<br>(glutamine/glutamate/aspartate?) |                                   |                                |
| Q5ZWX5                                                                             | lpg0959    | PF00496   | oligopeptide                                   |                                   |                                |

| Q5ZZC3                                         | lpg0088    | PF00497   | amino acid<br>(glutamine/glutamate/aspartate?) |                                   |                                                                                 |
|------------------------------------------------|------------|-----------|------------------------------------------------|-----------------------------------|---------------------------------------------------------------------------------|
| Q5ZWG2                                         | lpg1123    | PF00497   | amino acid<br>(glutamine/glutamate/aspartate?) |                                   |                                                                                 |
| Q5ZT89                                         | lpg2273    | PF13416   | sugar                                          |                                   |                                                                                 |
| Q5ZUG3                                         | lpg1835    | PF03180   | methionine                                     |                                   |                                                                                 |
| Q5ZXQ3                                         | lpg0678    | PF00497   | amino acid<br>(glutamine/glutamate/aspartate?) |                                   |                                                                                 |
| Q5ZV75                                         | lpg1565    | PF09084   | nitrate/sulfonate/taurine                      |                                   |                                                                                 |
| Q5ZWE7                                         | lpg1138    | PF13416   | spermidine/putrescine                          |                                   |                                                                                 |
| Q5ZY74                                         | lpg0498    | PF13458   | leucine/valine                                 |                                   |                                                                                 |
| Q5ZV85                                         | lpg1555    | PF00497   | amino acid<br>(glutamine/glutamate/aspartate?) |                                   |                                                                                 |
| Q5ZZ27                                         | lpg0184    | PF13407   | ribose                                         |                                   |                                                                                 |
| <b>Escherichia coli MG1655</b>                 |            |           |                                                |                                   |                                                                                 |
| Number of ORFs in the proteome: 4391           |            |           |                                                |                                   |                                                                                 |
| Number of SBPs: 49 (1.12% of total)            |            |           |                                                |                                   |                                                                                 |
| Lifestyle Summary: HUMAN INTESTINAL MICROFLORA |            |           |                                                |                                   |                                                                                 |
| SeqID                                          | Gene Locus | Pfam Code | Ligand prediction by TransportDB               | Experimentally identified ligands | References/pdb accession codes                                                  |
| P76223                                         | b1754      | PF13416   | spermidine/putrescine                          |                                   |                                                                                 |
| P75853                                         | b0936      | PF09084   | nitrate/sulfonate/taurine                      |                                   |                                                                                 |
| P38683                                         | b0994      | PF00532   | trimethylamine N-oxide                         |                                   |                                                                                 |
| P76042                                         | b1310      | PF01547   | sugar                                          |                                   |                                                                                 |
| P37676                                         | b3579      | PF03480   | C4-dicarboxylate                               | 2,3-diketo-l-gulonate (2,3-DKG)   | DOI: 10.1099/mic.0.28334-0                                                      |
| P39172                                         | b1857      | PF01297   | zinc ion                                       | Zinc                              | DOI: 10.1046/j.1365-2958.1998.00883.x; PDB: 2OGW, 2OSV, 2PRS, 2PS0, 2PS3, 2PS9, |

|              |       |         |                                             |                                                                                                                             |                                                                                                                              |
|--------------|-------|---------|---------------------------------------------|-----------------------------------------------------------------------------------------------------------------------------|------------------------------------------------------------------------------------------------------------------------------|
| P0AFK9       | b1123 | PF13416 | spermidine/putrescine                       | Polyamine (Spermidine / Putrescine)                                                                                         | DOI: 10.1002/pro.5560051004; DOI: 10.1074/jbc.271.16.9519; DOI: 10.1016/0014-5793(94)00435-8; PMID: 1939142; PDB: 1POT, 1POY |
| Q47537       | b0365 | PF04069 | glycine betaine                             | Taurine, 2-Aminoethylphosphonic acid, N-(2-Acetamido)-2-aminoethanesulfonic acid, 2-(N-Morpholino)ethanesulfonic acid (MES) | DOI: 10.1128/jb.178.18.5438-5446.1996; PDB: 6SSY, 6ST0, 6ST1, 6STL                                                           |
| P39325       | b4227 | PF13407 | ribose                                      | Galactose                                                                                                                   | DOI: 10.1074/jbc.M109.054296                                                                                                 |
| DOI: 10.1074 | b3453 | PF13416 | sugar                                       | Maltose, Glycerol-3-Phosphate                                                                                               | DOI: 10.1111/j.1365-2958.1988.tb00088.x                                                                                      |
| Q47622       | b1294 | PF00496 | oligopeptide                                |                                                                                                                             |                                                                                                                              |
| DOI: 10.1111 | b3566 | PF13407 | xylose                                      | Xylose                                                                                                                      | PMID: 8581399                                                                                                                |
| P0AEM9       | b1920 | PF00497 | amino acid (glutamine/glutamate/aspartate?) | Cystine / Cysteine                                                                                                          | DOI: 10.1016/0024-3205(93)90103-a; PMID: 4564569                                                                             |
| P33913       | b2177 | PF00496 | oligopeptide                                |                                                                                                                             |                                                                                                                              |
| P77269       | b2548 | PF13407 | ribose                                      |                                                                                                                             |                                                                                                                              |
| DOI: 10.1016 | b3020 | PF00496 | oligopeptide                                | Deoxycholate                                                                                                                | DOI: 10.1111/1462-2920.12749                                                                                                 |
| PMID: 85813  | b1243 | PF00496 | oligopeptide                                | Tripeptide (Gly-Leu-125I-Tyr)                                                                                               | PMID: 2187863; PDB: 3TCF, 3TCG                                                                                               |
| P04816       | b3458 | PF13458 | leucine/valine                              | Leucine, Isoleucine, Valine, Threonine, Alanine                                                                             | PMID: 3891753; 10.1002/jcb.240290305; 10.1016/0022-2836(89)90532-9                                                           |
| P77348       | b1329 | PF00496 | oligopeptide                                | Murein tripeptide; Pro-Phe-Lys                                                                                              | DOI: 10.1128/JB.180.5.1215-1223.1998                                                                                         |

|             |        |         |                                                |                                                                       |                                                                                                                                                |
|-------------|--------|---------|------------------------------------------------|-----------------------------------------------------------------------|------------------------------------------------------------------------------------------------------------------------------------------------|
| PMID: 3891  | b3544  | PF00496 | dipeptide/oligopeptide                         | Dipeptide; Pro-Gly; Gly-Leu                                           | DOI: 10.1128/jb.173.1.234-244.1991; DOI: 10.1111/j.1365-2958.1991.tb01876.x; DOI: 10.1002/pro.5560041110; DOI: 10.1021/bi00051a006; PDB: 1DPP, |
| P45766      | JW3236 | PF00497 | amino acid<br>(glutamine/glutamate/aspartate?) |                                                                       |                                                                                                                                                |
| P33590      | b3476  | PF00496 | nickel                                         | Nickel, nickel butane-1,2,4-tricarboxylate, Fe-L1, Fe-L2, Ru(bpza)CO, | DOI: 10.1111/j.1365-2958.1993.tb01247.x; DOI: 10.1074/jbc.M307941200; PDB: 1UIV, 3DP8, 3E3K, 5ON0, 5ON1, 5ON4, 5ON5, 5ON8, 5ON9, 6R4Q          |
| P76108      | b1440  | PF13416 | spermidine/putrescine                          | dsDNA                                                                 | DOI: 10.1016/j.bbrc.2016.01.137;                                                                                                               |
| P33362      | b2131  | PF04069 | glycine betaine                                | Choline-O-sulfate, glycine betaine, and dimethylsulfoniopropionate    | DOI: 10.1021/acs.biochem.5b00274                                                                                                               |
| POAEU0      | b2309  | PF00497 | amino acid<br>(glutamine/glutamate/aspartate?) | Histidine                                                             | DOI: 10.1021/bi00182a004                                                                                                                       |
| DOI: 10.102 | b0197  | PF03180 | methionine                                     | Methionine                                                            | DOI: 10.1128/JB.184.17.4930-4932.2002; PDB: 4YAH,                                                                                              |
| DOI: 10.100 | b0811  | PF00497 | amino acid<br>(glutamine/glutamate/aspartate?) | Glutamine                                                             | DOI: 10.1007/BF00430437; DOI: 10.1006/jmbi.1998.1675                                                                                           |

|        |        |         |                              |                                                  |                                                                                                                                                                       |
|--------|--------|---------|------------------------------|--------------------------------------------------|-----------------------------------------------------------------------------------------------------------------------------------------------------------------------|
| POAEX9 | b4034  | PF01547 | sugar (maltose?)             | Maltose, maltotriose, maltodextrin, cyclodextrin | DOI: 10.1111/j.1432-1033.1976.tb10383.x; PMID: 2155217; DOI: 10.2210/pdb1mbp/pdb; DOI: 10.1021/bi00159a003; DOI: 10.1016/s0969-2126(97)00253-0; PDB: 1A7L, 1ANF, 1DMB |
| POAD96 | b3460  | PF13458 | leucine/valine               | Leucine, Isoleucine, Valine                      | pdb: 1Z15, 1Z16, 1Z17, 1Z18; PMID: 3891753; 10.1002/jcb.240290305; 10.1016/0022-2836(89)90532-9; DOI: 10.1016/0014-5793(77)80331-1; DOI: 10.1016/0022-2836(89)90531-7 |
| P45464 | JW3116 | PF04348 | Not annotated in TransportDB | Penicillin                                       |                                                                                                                                                                       |
| P04846 | b3661  | PF03180 | methionine                   |                                                  |                                                                                                                                                                       |
| P31133 | b0854  | PF13416 | spermidine/putrescine        | Polyamine, putrescine                            | pdb: 1A99, 4JDF; PMID: 8416922; DOI: 10.1007/s00726-013-1517-x; DOI: 10.1074/jbc.273.28.17604                                                                         |
| POAG82 | b3728  | PF12849 | phosphate                    | Phosphate                                        | pdb: 1A40, 1A40, 1A54, 1A55, 1IXG, 1IXH, 1IXI, 1OIB, 1PBP, 1QUI, 1QUJ, 1QUK, 1QUL, 2ABH, DOI: 10.1038/347402a0; DOI: 10.1038/nsb0797-519; DOI: 10.1021/bi980428z      |
| POAFM2 | b2679  | PF04069 | glycine betaine              | Glycine-betaine, proline-betaine                 | pdb: 1R9L, 1R9Q; PMID: 3305496; DOI: 10.1007/BF00290728; DOI: 10.3109/09687688.2012.754060; DOI: 10.1074/jbc.M309771200                                               |



|        |       |         |                                                |                                                       |                                                                                                                                                                                                                 |
|--------|-------|---------|------------------------------------------------|-------------------------------------------------------|-----------------------------------------------------------------------------------------------------------------------------------------------------------------------------------------------------------------|
| P09551 | b2310 | PF00497 | amino acid<br>(glutamine/glutamate/aspartate?) |                                                       |                                                                                                                                                                                                                 |
| P76128 | b1487 | PF00496 | dipeptide/oligopeptide                         |                                                       |                                                                                                                                                                                                                 |
| P30859 | b0863 | PF00497 | amino acid<br>(glutamine/glutamate/aspartate?) | Arginine                                              | DOI: 10.1111/j.1365-2958.1995.mmi_17040675.x                                                                                                                                                                    |
| P30860 | b0860 | PF00497 | amino acid<br>(glutamine/glutamate/aspartate?) |                                                       |                                                                                                                                                                                                                 |
| P76142 | b1516 | PF13407 | rhamnose                                       | AI-2                                                  | DOI: 10.1128/JB.187.1.238-248.2005; DOI: 10.1128/JB.187.6.2066-2076.2005                                                                                                                                        |
| POAEL6 | b0592 | PF01497 | iron-hydroxamate                               | Ferric enterobactin                                   | pdb: 2M6K, 2M6L; DOI: 10.1099/13500872-141-7-1647                                                                                                                                                               |
| P15028 | b4290 | PF01497 | iron-hydroxamate                               | Fe(3+) dicitrate                                      | DOI: 10.1128/jb.171.5.2626-2633.1989                                                                                                                                                                            |
| P39265 | b4088 | PF13407 | ribose                                         | D-Allose                                              | pdb: 1GUB, 1GUD, 1RPJ; DOI: 10.1128/jb.179.24.7631-7637.1997; DOI: 10.1006/jmbi.1999.2571                                                                                                                       |
| P07822 | b0152 | PF01497 | iron-hydroxamate                               | Gallichrome, hydroxamate-type siderophores, albomycin | pdb: 1EFD, 1ESZ, 1K2V, 1K7S; DOI: 10.1038/74048; DOI: 10.1074/jbc.M109385200; DOI: 10.1007/BF02456611                                                                                                           |
| P02924 | b1901 | PF00532 | ribose                                         | L-arabinose, galactose                                | pdb: 1ABE, 1ABF, 1APB, 1BAP, 2WRZ, 5ABP, 6ABP, 7ABP, 8ABP, 9ABP; DOI: 10.1016/0022-2836(87)90607-3; PMID: 6885805; PMID: 326784; DOI: 10.1016/S0022-2836(05)80163-9; PMID: 7031057; PMID: 326785; PMID: 2204627 |
| P37902 | b0655 | PF00497 | amino acid<br>(glutamine/glutamate/aspartate?) | Glutamate, aspartate                                  | PMID: 1091635; PMID: 1091636                                                                                                                                                                                    |

|                                             |                   |                  |                                         |                      |                                                                                                                                                                                                              |
|---------------------------------------------|-------------------|------------------|-----------------------------------------|----------------------|--------------------------------------------------------------------------------------------------------------------------------------------------------------------------------------------------------------|
| P75797                                      | b0830             | PF00496          | dipeptide/oligopeptide                  | Glutathione          | DOI: 10.1128/JB.187.17.5861-5867.2005; DOI: 10.1155/2018/3429569                                                                                                                                             |
| POAEE5                                      | b2150             | PF13407          | xylose                                  | Sugars, galactose    | pdb: 1GLG, 2FVY, 2FW0, 2GBP, 2HPH, 2IPL, 2IPM, 2IPN, 2QW1; DOI: 10.1007/BF00267469; DOI: 10.1007/BF00330450; PMID: 7012152; DOI: 10.1073/pnas.80.7.1792; DOI: 10.1038/327635a0; DOI: 10.1126/science.3057628 |
| P37028                                      | b0158             | PF01497          | iron-hydroxamate                        | Cobalamin (Vit. B12) | pdb: 1N2Z, 1N4A, 1N4D, 2QI9, 4DBL, 4FI3, 5M29, 5M2Q, 5M34, 5M3B, 5OVW; DOI: 10.1128/JB.184.3.706-717.2002; DOI: 10.1073/pnas.262659699; DOI: 10.1074/jbc.M212239200                                          |
| P02925                                      | b3751             | PF13407          | ribose                                  | Ribose               | pdb: 1BA2, 1DBP, 1DRJ, 1DRK, 1URP, 2DRI, 2GX6; PMID: 6313683; PMID: 3011793; PMID: 4608146; DOI: 10.1128/jb.158.2.674-682.1984; 25533465; DOI: 10.1016/0022-2836(92)91033-l; PMID: 7982928; 9641984          |
| <b><i>Agrobacterium fabrum str. C58</i></b> |                   |                  |                                         |                      |                                                                                                                                                                                                              |
| Number of ORFs in the proteome: 5344        |                   |                  |                                         |                      |                                                                                                                                                                                                              |
| Number of SBPs: 169 (3.16% of total)        |                   |                  |                                         |                      |                                                                                                                                                                                                              |
| Lifestyle Summary: PLANT PATHOGEN           |                   |                  |                                         |                      |                                                                                                                                                                                                              |
| <b>SeqID</b>                                | <b>Gene Locus</b> | <b>Pfam Code</b> | <b>Ligand prediction by TransportDB</b> |                      |                                                                                                                                                                                                              |
| Q8UB32                                      | Atu3185           | PF13416          | sugar                                   |                      |                                                                                                                                                                                                              |

|        |         |         |                                                |                                                                                          |                                                                                                                    |
|--------|---------|---------|------------------------------------------------|------------------------------------------------------------------------------------------|--------------------------------------------------------------------------------------------------------------------|
| P35120 | Atu6027 | PF00497 | amino acid<br>(glutamine/glutamate/aspartate?) | Octopine, nopaline,<br>pyronopaline, histopine,<br>octopinic acid, noroctopinic<br>acid, | pdb: 4POI, 4POW, 4POX, 4PP0,<br>5ITO, 5ITP, 5OT8, 5OT9, 5OTA,<br>5OTC, 5OVZ; DOI:<br>10.1128/jb.174.3.841-849.1992 |
| P25548 | Atu2348 | PF13407 | xylose                                         | Arabinose, galactose,<br>galacturonate, D-xylose, D-<br>fucose                           | pdb: 3URM, 3UUG, DOI:<br>10.1128/jb.172.11.6442-<br>6446.1990; PMID: 8253785                                       |
| A9CH17 | Atu4727 | PF03401 | tricarboxylate                                 |                                                                                          |                                                                                                                    |
| Q7CTI9 | Atu3881 | PF13407 | rhamnose                                       |                                                                                          |                                                                                                                    |
| Q7CYI8 | Atu1789 | PF02608 | sugar                                          |                                                                                          |                                                                                                                    |
| A9CF36 | Atu3372 | PF13407 | xylose                                         |                                                                                          |                                                                                                                    |
| Q7CVZ2 | Atu4826 | PF03480 | C4-dicarboxylate                               |                                                                                          |                                                                                                                    |
| Q7CRM8 | Atu3114 | PF13416 | sugar                                          |                                                                                          |                                                                                                                    |
| A9CLC1 | Atu5343 | PF00496 | dipeptide/oligopeptide                         |                                                                                          |                                                                                                                    |
| Q7CVL1 | Atu4687 | PF00497 | amino acid<br>(glutamine/glutamate/aspartate?) |                                                                                          |                                                                                                                    |
| A9CL62 | Atu5459 | PF01547 | sugar                                          |                                                                                          |                                                                                                                    |
| Q7CZ25 | Atu1521 | PF01297 | zinc ion                                       |                                                                                          |                                                                                                                    |
| A9CFT2 | Atu3891 | PF13416 | sugar                                          |                                                                                          |                                                                                                                    |
| A9CKI0 | Atu0249 | PF03480 | C4-dicarboxylate                               |                                                                                          |                                                                                                                    |
| A9CEX5 | Atu3253 | PF03480 | C4-dicarboxylate                               |                                                                                          |                                                                                                                    |
| A9CLG5 | Atu5268 | PF03480 | C4-dicarboxylate                               |                                                                                          |                                                                                                                    |
| A9CES0 | Atu3158 | PF03480 | C4-dicarboxylate                               |                                                                                          |                                                                                                                    |
| A9CF33 | Atu3368 | PF03480 | C4-dicarboxylate                               |                                                                                          |                                                                                                                    |
| A9CET7 | Atu3178 | PF01297 | manganese/zinc ion                             |                                                                                          |                                                                                                                    |
| Q7CRP0 | Atu3130 | PF01547 | sugar                                          |                                                                                          |                                                                                                                    |
| A9CKR7 | Atu0063 | PF13407 | ribose                                         |                                                                                          |                                                                                                                    |
| Q7CV16 | Atu4471 | PF01297 | manganese/zinc ion                             |                                                                                          |                                                                                                                    |
| Q7D447 | Atu5006 | PF00497 | amino acid<br>(glutamine/glutamate/aspartate?) | Glucopine, deoxy-fructosyl-<br>glutamine                                                 | pdb: 5L9O, 5LOM, , DOI:<br>10.1074/jbc.M116.745562                                                                 |
| Q7D2V5 | Atu5522 | PF13458 | branched-chain amino acid                      |                                                                                          |                                                                                                                    |
| A9CLR3 | Atu5058 | PF13416 | sugar                                          |                                                                                          |                                                                                                                    |
| A9CGS7 | Atu4525 | PF00496 | dipeptide/oligopeptide                         |                                                                                          |                                                                                                                    |

|        |         |         |                                                |                                  |                                            |
|--------|---------|---------|------------------------------------------------|----------------------------------|--------------------------------------------|
| A9CF11 | Atu3338 | PF01547 | sugar                                          |                                  |                                            |
| A9CLD8 | Atu5312 | PF01497 | iron-hydroxamate                               |                                  |                                            |
| A9CEV8 | Atu3222 | PF13407 | ribose                                         |                                  |                                            |
| A9CKB6 | Atu0394 | PF13416 | sugar                                          |                                  |                                            |
| A9CEN1 | Atu3088 | PF13416 | spermidine/putrescine                          |                                  |                                            |
| A9CGV5 | Atu4596 | PF09084 | phosphonates                                   |                                  |                                            |
| A9CK51 | Atu0609 | PF13416 | spermidine/putrescine                          |                                  |                                            |
| Q7CRP6 | Atu3137 | PF03480 | C4-dicarboxylate                               |                                  |                                            |
| A9CHW9 | Atu2391 | PF09084 | phosphonates                                   |                                  |                                            |
| A9CL48 | Atu5482 | PF00497 | amino acid<br>(glutamine/glutamate/aspartate?) |                                  |                                            |
| Q7CS92 | Atu3357 | PF00497 | amino acid<br>(glutamine/glutamate/aspartate?) |                                  |                                            |
| A9CKE7 | Atu0305 | PF13416 | sugar                                          |                                  |                                            |
| A9CLG7 | Atu5265 | PF13416 | sugar                                          |                                  |                                            |
| A9CH15 | Atu4719 | PF00496 | dipeptide/oligopeptide                         |                                  |                                            |
| A9CLH3 | Atu5253 | PF00496 | dipeptide/oligopeptide                         |                                  |                                            |
| A9CGA5 | Atu4243 | PF13416 | spermidine/putrescine                          | GABA                             | pdb: 4EQ7, 4EUO, DOI:<br>10.1111/mmi.12043 |
| A9CEL8 | Atu3063 | PF13407 | rhamnose                                       |                                  |                                            |
| A9CL91 | Atu5403 | PF13416 | sugar                                          |                                  |                                            |
| A9CGI0 | Atu4361 | PF01547 | sugar                                          | Maltotriose, maltose,<br>sucrose | pdb: 4QRZ, 4QSC, 4QSD                      |
| Q7CWQ0 | Atu2587 | PF00496 | dipeptide/oligopeptide                         |                                  |                                            |
| A9CF22 | Atu3352 | PF01547 | sugar                                          |                                  |                                            |
| A9CGY7 | Atu4654 | PF13416 | sugar                                          |                                  |                                            |
| Q7CV59 | Atu4519 | PF13458 | urea                                           |                                  |                                            |
| A9CLH5 | Atu5249 | PF13416 | spermidine/putrescine                          |                                  |                                            |
| A9CHR1 | Atu2505 | PF01547 | sugar                                          |                                  |                                            |
| A9CF60 | Atu3409 | PF00496 | dipeptide/oligopeptide                         |                                  |                                            |
| Q7CTQ1 | Atu3957 | PF04069 | glycine betaine                                |                                  |                                            |
| A9CEU5 | Atu3198 | PF13407 | xylose                                         |                                  |                                            |
| Q7CTE3 | Atu3821 | PF13407 | ribose                                         |                                  |                                            |

|        |         |         |                                                |  |  |
|--------|---------|---------|------------------------------------------------|--|--|
| A9CEW7 | Atu3239 | PF13416 | sugar                                          |  |  |
| Q7CZC4 | Atu1399 | PF00497 | amino acid<br>(glutamine/glutamate/aspartate?) |  |  |
| Q7CS07 | Atu3260 | PF03480 | C4-dicarboxylate                               |  |  |
| A9CI34 | Atu2276 | PF13458 | leucine/valine                                 |  |  |
| A9CER5 | Atu3151 | PF13416 | sugar                                          |  |  |
| A9CGU1 | Atu4568 | PF13416 | spermidine/putrescine                          |  |  |
| Q7D356 | Atu5411 | PF13416 | 2-aminoethylphosphonate                        |  |  |
| Q7D260 | Atu0116 | PF03401 | tricarboxylate                                 |  |  |
| A9CKN9 | Atu0126 | PF02608 | sugar                                          |  |  |
| A9CGT6 | Atu4552 | PF13407 | xylose                                         |  |  |
| Q7CSG3 | Atu3433 | PF00496 | dipeptide/oligopeptide                         |  |  |
| A9CF88 | Atu3455 | PF00496 | dipeptide/oligopeptide                         |  |  |
| A9CKY0 | Atu6073 | PF00496 | dipeptide/oligopeptide                         |  |  |
| Q7CU99 | Atu4192 | PF00496 | dipeptide/oligopeptide                         |  |  |
| A9CKK7 | Atu0199 | PF04069 | glycine betaine                                |  |  |
| A9CH32 | Atu4755 | PF00497 | amino acid<br>(glutamine/glutamate/aspartate?) |  |  |
| A9CHT0 | Atu2469 | PF03401 | tricarboxylate                                 |  |  |
| A9CLC6 | Atu5330 | PF03401 | tricarboxylate                                 |  |  |
| Q7D348 | Atu5420 | PF13416 | spermidine/putrescine                          |  |  |
| Q7CX03 | Atu2460 | PF01497 | iron-hydroxamate                               |  |  |
| Q7CSE8 | Atu3415 | PF00497 | amino acid<br>(glutamine/glutamate/aspartate?) |  |  |
| A9CHF0 | Atu2744 | PF03480 | C4-dicarboxylate                               |  |  |
| A9CFA6 | Atu3487 | PF13407 | rhamnose                                       |  |  |
| Q7CSG2 | Atu3432 | PF09084 | phosphonates                                   |  |  |
| Q7CS16 | Atu3269 | PF00496 | dipeptide/oligopeptide                         |  |  |
| Q7CVF6 | Atu4626 | PF00496 | dipeptide/oligopeptide                         |  |  |
| A9CFZ8 | Atu4046 | PF04069 | glycine betaine                                |  |  |
| A9CKL4 | Atu0187 | PF00496 | oligopeptide                                   |  |  |
| Q7CVI9 | Atu4661 | PF00496 | dipeptide/oligopeptide                         |  |  |
| A9CGB3 | Atu4252 | PF01547 | sugar                                          |  |  |

|        |         |         |                                                |  |  |
|--------|---------|---------|------------------------------------------------|--|--|
| Q7D230 | Atu0157 | PF09084 | nitrate/sulfonate/taurine                      |  |  |
| A9CJS1 | Atu0895 | PF04069 | glycine betaine                                |  |  |
| Q7CSP9 | Atu3533 | PF13407 | rhamnose                                       |  |  |
| A9CLJ7 | Atu5220 | PF04069 | glycine betaine                                |  |  |
| A9CGQ9 | Atu4489 | PF03180 | methionine                                     |  |  |
| A9CEN9 | Atu3102 | PF01547 | sugar                                          |  |  |
| A9CF80 | Atu3444 | PF00496 | dipeptide/oligopeptide                         |  |  |
| Q7CV87 | Atu4551 | PF13407 | xylose                                         |  |  |
| A9CET3 | Atu3174 | PF01547 | sugar                                          |  |  |
| A9CHX9 | Atu2365 | PF00497 | amino acid<br>(glutamine/glutamate/aspartate?) |  |  |
| A9CGF3 | Atu4320 | PF13407 | xylose                                         |  |  |
| Q7CUZ5 | Atu4447 | PF01547 | sugar                                          |  |  |
| Q7CRS2 | Atu3165 | PF01547 | sugar                                          |  |  |
| A9CF37 | Atu3375 | PF00496 | dipeptide/oligopeptide                         |  |  |
| A9CJ45 | Atu1404 | PF01547 | sugar                                          |  |  |
| Q7CWZ6 | Atu2467 | PF13416 | 2-aminoethylphosphonate                        |  |  |
| A9CKY3 | Atu6070 | PF13407 | xylose                                         |  |  |
| A9CHP9 | Atu2518 | PF00496 | dipeptide/oligopeptide                         |  |  |
| A9CEK8 | Atu3041 | PF00496 | dipeptide/oligopeptide                         |  |  |
| A9CIN5 | Atu1774 | PF00496 | oligopeptide                                   |  |  |
| Q8U4Z3 | Atu4233 | PF00497 | amino acid<br>(glutamine/glutamate/aspartate?) |  |  |
| A9CKZ1 | Atu6059 | PF09084 | nitrate/sulfonate/taurine                      |  |  |
| Q7CRM0 | Atu3106 | PF13416 | sugar                                          |  |  |
| Q7CZR9 | Atu1202 | PF00496 | dipeptide/oligopeptide                         |  |  |
| Q7CXZ0 | Atu2060 | PF04069 | choline                                        |  |  |
| A9CGZ5 | Atu4678 | PF00497 | amino acid<br>(glutamine/glutamate/aspartate?) |  |  |
| A9CII3 | Atu1879 | PF00497 | amino acid<br>(glutamine/glutamate/aspartate?) |  |  |
| A9CG31 | Atu4113 | PF00496 | dipeptide/oligopeptide                         |  |  |

|        |         |         |                                                |  |  |
|--------|---------|---------|------------------------------------------------|--|--|
| A9CIW8 | Atu1577 | PF00497 | amino acid<br>(glutamine/glutamate/aspartate?) |  |  |
| A9CGD4 | Atu4284 | PF00497 | amino acid<br>(glutamine/glutamate/aspartate?) |  |  |
| A9CFV8 | Atu3967 | PF13416 | sugar                                          |  |  |
| A9CLI2 | Atu5237 | PF00497 | amino acid<br>(glutamine/glutamate/aspartate?) |  |  |
| Q7CVH6 | Atu4647 | PF04069 | choline                                        |  |  |
| Q7CUS0 | Atu4369 | PF13407 | rhamnose                                       |  |  |
| Q7CV99 | Atu4564 | PF13416 | sugar                                          |  |  |
| Q7CYA2 | Atu1899 | PF13407 | xylose                                         |  |  |
| A9CF49 | Atu3391 | PF01497 | iron-hydroxamate                               |  |  |
| A9CF48 | Atu3390 | PF01497 | iron-hydroxamate                               |  |  |
| Q7CW05 | Atu4842 | PF13407 | rhamnose                                       |  |  |
| Q7CV72 | Atu4535 | PF00497 | amino acid<br>(glutamine/glutamate/aspartate?) |  |  |
| A9CLQ4 | Atu5071 | PF00496 | dipeptide/oligopeptide                         |  |  |
| A9CEN5 | Atu3096 | PF13416 | sugar                                          |  |  |
| Q7CT32 | Atu3688 | PF01497 | iron-hydroxamate                               |  |  |
| A9CJ39 | Atu1413 | PF13458 | leucine/valine                                 |  |  |
| A9CG80 | Atu4208 | PF01547 | sugar (maltose?)                               |  |  |
| A9CL69 | Atu5441 | PF00496 | dipeptide/oligopeptide                         |  |  |
| A9CFE7 | Atu3576 | PF13407 | xylose                                         |  |  |
| Q7CWI2 | Atu2672 | PF04392 | Unclassified                                   |  |  |
| A9CGM8 | Atu4431 | PF00496 | dipeptide/oligopeptide                         |  |  |
| A9CK59 | Atu0591 | PF01547 | sugar                                          |  |  |
| A9CL88 | Atu5409 | PF00497 | amino acid<br>(glutamine/glutamate/aspartate?) |  |  |
| Q7CRG5 | Atu3049 | PF00496 | dipeptide/oligopeptide                         |  |  |
| A9CJJ9 | Atu1046 | PF09084 | nitrate/sulfonate/taurine                      |  |  |
| Q7CW67 | Atu2817 | PF13407 | rhamnose                                       |  |  |
| A9CKA7 | Atu0420 | PF12849 | phosphate                                      |  |  |

|        |         |         |                                                |                     |                                                                             |
|--------|---------|---------|------------------------------------------------|---------------------|-----------------------------------------------------------------------------|
| Q7D1E1 | Atu0479 | PF00497 | amino acid<br>(glutamine/glutamate/aspartate?) |                     |                                                                             |
| A9CFZ3 | Atu4033 | PF13407 | rhamnose                                       |                     |                                                                             |
| Q7CVL9 | Atu4695 | PF00496 | dipeptide/oligopeptide                         |                     |                                                                             |
| A9CH25 | Atu4744 | PF13407 | rhamnose                                       |                     |                                                                             |
| Q7CTC2 | Atu3800 | PF04069 | glycine betaine                                |                     |                                                                             |
| A9CF65 | Atu3416 | PF00497 | amino acid<br>(glutamine/glutamate/aspartate?) |                     |                                                                             |
| A9CEY9 | Atu3282 | PF01547 | sugar                                          |                     |                                                                             |
| A9CG38 | Atu4123 | PF13458 | urea                                           |                     |                                                                             |
| Q7CS34 | Atu3287 | PF09084 | phosphonates                                   |                     |                                                                             |
| Q7CX36 | Atu2422 | PF13458 | leucine/valine                                 | Val, Pro, Ala, GABA | pdb: 3IP5, 3IP6, 3IP7, 3IP9, 3IPA,<br>3IPC, DOI:<br>10.1074/jbc.M110.140715 |
| A9CHS7 | Atu2473 | PF01497 | iron-hydroxamate                               |                     |                                                                             |
| A9CEJ8 | Atu3024 | PF01547 | sugar                                          |                     |                                                                             |
| A9CI54 | Atu2229 | PF00497 | amino acid<br>(glutamine/glutamate/aspartate?) |                     |                                                                             |
| A9CHL4 | Atu2601 | PF13416 | sugar                                          |                     |                                                                             |
| A9CEX0 | Atu3245 | PF00497 | amino acid<br>(glutamine/glutamate/aspartate?) |                     |                                                                             |
| A9CGN3 | Atu4438 | PF00496 | dipeptide/oligopeptide                         |                     |                                                                             |
| A9CJ57 | Atu1388 | PF00497 | amino acid<br>(glutamine/glutamate/aspartate?) |                     |                                                                             |
| A9CF79 | Atu3442 | PF00496 | dipeptide/oligopeptide                         |                     |                                                                             |
| A9CGB6 | Atu4259 | PF00496 | oligopeptide                                   |                     |                                                                             |
| A9CGT1 | Atu4534 | PF00497 | amino acid<br>(glutamine/glutamate/aspartate?) |                     |                                                                             |
| A9CEX1 | Atu3246 | PF00497 | amino acid<br>(glutamine/glutamate/aspartate?) |                     |                                                                             |
| Q7CTW0 | Atu4023 | PF01497 | iron-hydroxamate                               |                     |                                                                             |
| Q7CXG0 | Atu2281 | PF04069 | choline                                        |                     |                                                                             |
| A9CLM6 | Atu5129 | PF13416 | spermidine/putrescine                          |                     |                                                                             |



| A9CF53                                                                                                          | Atu3396    | PF01497   | cobalamin                                      |                                                                                                                                                                               |                                                                                                                                     |
|-----------------------------------------------------------------------------------------------------------------|------------|-----------|------------------------------------------------|-------------------------------------------------------------------------------------------------------------------------------------------------------------------------------|-------------------------------------------------------------------------------------------------------------------------------------|
| A9CGM0                                                                                                          | Atu4421    | PF13416   | 2-aminoethylphosphonate                        |                                                                                                                                                                               |                                                                                                                                     |
| Q7CYE9                                                                                                          | Atu1838    | PF13458   | leucine/valine                                 |                                                                                                                                                                               |                                                                                                                                     |
| Q52012                                                                                                          | Atu6139    | PF00496   | dipeptide/oligopeptide                         | Agrocinopine A, agrocin 84, D-Glucose-2-phosphate, agrocinopine-3'-O-benzoate, L-arabinose-2-phosphate, L-arabinose-2-isopropylphosphate, 2-glucose-2-O-lactic acid phosphate | pdb: 4RA1, 4ZE8, 4ZE9, 4ZEB, 4ZEC, 4ZED, 4ZEI, 4ZEK, 6I7W, DOI: 10.1128/jb.179.23.7559-7572.1997; DOI: 10.1371/journal.ppat.1005071 |
| <b><i>Xanthomonas campestris pv. campestris</i> (strain ATCC 33913 / DSM 3586 / NCPPB 528 / LMG 568 / P 25)</b> |            |           |                                                |                                                                                                                                                                               |                                                                                                                                     |
| Number of ORFs in the proteome: 4127                                                                            |            |           |                                                |                                                                                                                                                                               |                                                                                                                                     |
| Number of SBPs: 9 (0.22% of total)                                                                              |            |           |                                                |                                                                                                                                                                               |                                                                                                                                     |
| Lifestyle Summary: PLANT PATHOGEN                                                                               |            |           |                                                |                                                                                                                                                                               |                                                                                                                                     |
| SeqID                                                                                                           | Gene Locus | Pfam Code | Ligand prediction by TransportDB               | Experimentally identified ligands                                                                                                                                             | References/pdb accession codes                                                                                                      |
| Q8P511                                                                                                          | XCC3537    | PF00497   | amino acid<br>(glutamine/glutamate/aspartate?) |                                                                                                                                                                               |                                                                                                                                     |
| Q8PAF7                                                                                                          | XCC1527    | PF12849   | phosphate                                      |                                                                                                                                                                               |                                                                                                                                     |
| Q8PAF6                                                                                                          | XCC1528    | PF12849   | phosphate                                      |                                                                                                                                                                               |                                                                                                                                     |
| Q8P899                                                                                                          | XCC2344    | PF13416   | spermidine/putrescine                          |                                                                                                                                                                               |                                                                                                                                     |
| Q8PCG0                                                                                                          | XCC0774    | PF09084   | nitrate/sulfonate/taurine                      |                                                                                                                                                                               |                                                                                                                                     |
| Q8P8N4                                                                                                          | XCC2206    | PF13416   | sugar                                          |                                                                                                                                                                               |                                                                                                                                     |
| Q8P4S9                                                                                                          | XCC3628    | PF03180   | methionine                                     |                                                                                                                                                                               |                                                                                                                                     |
| Q8PCL3                                                                                                          | XCC0711    | PF04348   | Not annotated in TransportDB                   |                                                                                                                                                                               |                                                                                                                                     |
| Q8PE37                                                                                                          | XCC0146    | PF03480   | C4-dicarboxylate                               |                                                                                                                                                                               |                                                                                                                                     |
| <b><i>Salmonella typhimurium</i> (strain LT2 / SGSC1412 / ATCC 700720)</b>                                      |            |           |                                                |                                                                                                                                                                               |                                                                                                                                     |
| Number of ORFs in the proteome: 4533                                                                            |            |           |                                                |                                                                                                                                                                               |                                                                                                                                     |
| Number of SBPs: 45 (0.99% of total)                                                                             |            |           |                                                |                                                                                                                                                                               |                                                                                                                                     |

| Lifestyle Summary: HUMAN/ANIMAL PATHOGEN |            |           |                                             |                                                                               |                                                                                                                                                       |
|------------------------------------------|------------|-----------|---------------------------------------------|-------------------------------------------------------------------------------|-------------------------------------------------------------------------------------------------------------------------------------------------------|
| SeqID                                    | Gene Locus | Pfam Code | Ligand prediction by TransportDB            | Experimentally identified ligands                                             | References/pdb accession codes                                                                                                                        |
| P43020                                   | STM4054    | PF03480   | C4-dicarboxylate                            |                                                                               |                                                                                                                                                       |
| Q8ZML1                                   | STM2811    | PF04069   | glycine betaine                             |                                                                               |                                                                                                                                                       |
| Q7CPK0                                   | STM3557    | PF13416   | sugar                                       |                                                                               |                                                                                                                                                       |
| P36634                                   | STM1692    | PF00496   | oligopeptide                                | Antimicrobial peptides                                                        | DOI: 10.1002/j.1460-2075.1993.tb06089.x                                                                                                               |
| P96062                                   | STM0429    | PF01547   | 2-aminoethylphosphonate                     | Phosphonates                                                                  | DOI: 10.1128/jb.177.22.6411-6421.1995                                                                                                                 |
| POA1W6                                   | STM3564    | PF13458   | leucine/valine                              | Branched chain amino acids                                                    | DOI: 10.1093/oxfordjournals.jbchem.a123026                                                                                                            |
| P19576                                   | STM4229    | PF01547   | sugar (maltose?)                            | maltose, sugars, acarbose                                                     | pdb: 3JYR, 6LOZ, 6L3E, DOI: 10.1007/BF00331269; DOI: 10.1016/0167-4781(92)90492-i                                                                     |
| POA2C7                                   | STM1222    | PF13416   | spermidine/putrescine                       |                                                                               |                                                                                                                                                       |
| Q8ZKQ1                                   | STM4077    | PF13407   | rhamnose                                    | Autoinducer-2, (2R,4S)-2-methyl-2,3,3,4-tetrahydroxytetrahydrofuran (R-THMF), | pdb: 1TJY, 1TM2, DOI: 10.1046/j.1365-2958.2001.02669.x                                                                                                |
| P17215                                   | STM3567    | PF13458   | leucine/valine                              | Branched chain amino acids                                                    | DOI: 10.1093/oxfordjournals.jbchem.a123026                                                                                                            |
| P02910                                   | STM2354    | PF00497   | amino acid (glutamine/glutamate/aspartate?) | Histidine                                                                     | pdb: 1HPB; DOI: 10.1038/298723a0; DOI: 10.1073/pnas.78.10.6038; PMID: 7007375; DOI: 10.1073/pnas.95.7.3495; DOI: 10.1074/jbc.274.2.739; PMID: 8307974 |

|        |         |         |                                                |                                         |                                                                                                                                                                                                                                                                                                                                                                                                                                 |
|--------|---------|---------|------------------------------------------------|-----------------------------------------|---------------------------------------------------------------------------------------------------------------------------------------------------------------------------------------------------------------------------------------------------------------------------------------------------------------------------------------------------------------------------------------------------------------------------------|
| Q8ZPK2 | STM1493 | PF04069 | glycine betaine                                | Glycine betaine, choline-O-sulfate      | DOI: 10.1128/JB.00495-12                                                                                                                                                                                                                                                                                                                                                                                                        |
| P0A2C5 | STM3884 | PF13407 | ribose                                         | Ribose                                  | PMID: 6415058                                                                                                                                                                                                                                                                                                                                                                                                                   |
| P06202 | STM1746 | PF00496 | oligopeptide                                   | Oligopeptides                           | pdb: 1B05, 1B0H, 1B1H, 1B2H, 1B32, 1B3F, 1B3G, 1B3H, 1B3L, 1B40, 1B46, 1B4H, 1B4Z, 1B51, 1B52, 1B58, 1B5H, 1B5I, 1B5J, 1B6H, 1B7H, 1B9J, 1JET, 1JEU, 1JEV, 1OLA, 1OLC, 1QKA, 1QKB, 1RKM, 2OLB, 2RKM, DOI: 10.1016/0022-2836(87)90332-9; DOI: 10.1126/science.8202710; DOI: 10.1016/s0969-2126(01)00276-3; DOI: 10.1110/ps.8.7.1432; <a href="https://doi.org/10.1006/jmbi.1999.2929">https://doi.org/10.1006/jmbi.1999.2929</a> |
| Q9ZF60 | STM0665 | PF00497 | amino acid<br>(glutamine/glutamate/aspartate?) |                                         |                                                                                                                                                                                                                                                                                                                                                                                                                                 |
| P02911 | STM2355 | PF00497 | amino acid<br>(glutamine/glutamate/aspartate?) | Arginine, positively charge amino acids | pdb: 1LAF, 1LAG, 1LAH, 1LST, 2LAO, 5OWF, 6FT2, 6MKU, 6MKW, 6MKX, 6MLO, 6ML9, 6MLA, 6MLD, 6MLE, 6MLG, 6MLI, 6MLJ, 6MLN, 6MLO, 6MLP, 6MLV, DOI: 10.1073/pnas.78.10.6038; DOI: 10.1016/j.bbamem.2013.08.024; PMID: 1748660; PMID: 8496186                                                                                                                                                                                          |
| Q8ZQM3 | STM0849 | PF00496 | dipeptide/oligopeptide                         |                                         |                                                                                                                                                                                                                                                                                                                                                                                                                                 |
| Q8ZRP7 | STM0206 | PF01497 | iron-hydroxamate                               | Cobalamin                               | DOI: 10.1128/JB.181.17.5539-5541.1999                                                                                                                                                                                                                                                                                                                                                                                           |

|        |         |         |                                                |                                                            |                                                                                                                                                                                  |
|--------|---------|---------|------------------------------------------------|------------------------------------------------------------|----------------------------------------------------------------------------------------------------------------------------------------------------------------------------------|
| P23905 | STM2190 | PF13407 | xylose                                         | Glucose; galactose; (2R)-glyceryl-beta-D-galactopyranoside | doi: 10.1006/jmbi.1993.1549; doi: 10.1111/j.1742-4658.2009.06945.x; PMID: 1967096; DOI: 10.1007/BF00330498; DOI: 10.2210/pdb1gbp/pdb; DOI: 10.1006/jmbi.1993.1549; PMID: 8132630 |
| Q8ZRN1 | STM0245 | PF03180 | methionine                                     |                                                            |                                                                                                                                                                                  |
| Q8ZLA9 | STM3630 | PF00496 | dipeptide/oligopeptide                         |                                                            |                                                                                                                                                                                  |
| Q8ZPA3 | STM1633 | PF00497 | amino acid<br>(glutamine/glutamate/aspartate?) | D-Alanine                                                  | PDB: 4F3S;                                                                                                                                                                       |
| Q8ZM02 | STM3169 | PF03480 | C4-dicarboxylate                               |                                                            |                                                                                                                                                                                  |
| Q8ZNM8 | STM2165 | PF04069 | glycine betaine                                |                                                            |                                                                                                                                                                                  |
| Q8ZKX5 | STM3857 | PF12849 | phosphate                                      |                                                            |                                                                                                                                                                                  |
| Q8XG72 | STM0890 | PF00497 | amino acid<br>(glutamine/glutamate/aspartate?) |                                                            |                                                                                                                                                                                  |
| Q8ZM19 | STM3142 | PF01497 | iron-hydroxamate                               |                                                            |                                                                                                                                                                                  |
| Q8ZNK0 | STM2216 | PF00496 | oligopeptide                                   |                                                            |                                                                                                                                                                                  |
| Q8ZP68 | STM1679 | PF00496 | oligopeptide                                   |                                                            |                                                                                                                                                                                  |
| Q9FA46 | STM2786 | PF03401 | tricarboxylate                                 |                                                            |                                                                                                                                                                                  |
| Q8ZLH2 | STM3528 | PF12849 | phosphate                                      |                                                            |                                                                                                                                                                                  |
| Q7CQV2 | STM0887 | PF00497 | amino acid<br>(glutamine/glutamate/aspartate?) |                                                            |                                                                                                                                                                                  |
| Q8ZNV8 | STM1891 | PF01297 | zinc ion                                       | Zinc                                                       | doi: 10.1016/j.jmb.2011.04.036; DOI: 10.1016/j.jmb.2011.04.036                                                                                                                   |
| Q8ZR34 | STM0594 | PF01497 | iron-hydroxamate                               |                                                            |                                                                                                                                                                                  |
| Q9S4Z1 | STM0510 | PF03180 | methionine                                     |                                                            |                                                                                                                                                                                  |
| Q8ZRQ0 | STM0193 | PF01497 | iron-hydroxamate                               |                                                            |                                                                                                                                                                                  |
| Q8ZLU4 | STM3264 | PF04348 | Not annotated in TransportDB                   |                                                            |                                                                                                                                                                                  |
| Q8ZKZ4 | STM3825 | PF00532 | trimethylamine N-oxide                         |                                                            |                                                                                                                                                                                  |
| Q8ZQK0 | STM0877 | PF13416 | spermidine/putrescine                          |                                                            |                                                                                                                                                                                  |

| H9L419                                         | STM1954     | PF00497   | amino acid<br>(glutamine/glutamate/aspartate?) |                                   |                                |
|------------------------------------------------|-------------|-----------|------------------------------------------------|-----------------------------------|--------------------------------|
| Q7CPX8                                         | STM2861     | PF01297   | manganese/zinc ion                             |                                   |                                |
| Q7CQW0                                         | STM0830     | PF00497   | amino acid<br>(glutamine/glutamate/aspartate?) |                                   |                                |
| Q8ZL79                                         | STM3673     | PF03480   | C4-dicarboxylate                               |                                   |                                |
| Q8ZKA9                                         | STM4351     | PF00497   | amino acid<br>(glutamine/glutamate/aspartate?) | Arginine                          | doi: 10.1002/prot.23060        |
| Q8ZPY3                                         | STM1255     | PF00496   | dipeptide/oligopeptide                         |                                   |                                |
| <b><i>Bacillus amyloliquefaciens</i> FZB42</b> |             |           |                                                |                                   |                                |
| Number of ORFs in the proteome: 3711           |             |           |                                                |                                   |                                |
| Number of SBPs: 33 (0.89% of total)            |             |           |                                                |                                   |                                |
| Lifestyle Summary: SOIL                        |             |           |                                                |                                   |                                |
| SeqID                                          | Gene Locus  | Pfam Code | Ligand prediction by TransportDB               | Experimentally identified ligands | References/pdb accession codes |
| A7Z1K0                                         | RBAM_004770 | PF03480   | C4-dicarboxylate                               |                                   |                                |
| A7Z3C6                                         | RBAM_011380 | PF00496   | dipeptide/oligopeptide                         |                                   |                                |
| A7Z8W3                                         | RBAM_031080 | PF04069   | glycine betaine                                |                                   |                                |
| A7Z7G3                                         | RBAM_025810 | PF01547   | sugar                                          |                                   |                                |
| A7Z0U0                                         | RBAM_002120 | PF01497   | iron-hydroxamate                               |                                   |                                |
| A7Z147                                         | RBAM_003240 | PF04069   | glycine betaine                                |                                   |                                |
| A7Z2Q1                                         | RBAM_009120 | PF09084   | phosphonates                                   |                                   |                                |
| A7Z2D8                                         | RBAM_007800 | PF03401   | tricarboxylate                                 |                                   |                                |
| A7Z6R3                                         | RBAM_023290 | PF12849   | phosphate                                      |                                   |                                |
| A7Z7Z3                                         | RBAM_027610 | PF09084   | nitrate/sulfonate/taurine                      |                                   |                                |
| A7ZAF9                                         | RBAM_036560 | PF01497   | iron-hydroxamate                               |                                   |                                |
| A7Z3R8                                         | RBAM_012810 | PF00496   | oligopeptide                                   |                                   |                                |
| A7Z869                                         | RBAM_028640 | PF02608   | sugar                                          |                                   |                                |
| A7Z8T8                                         | RBAM_030830 | PF00497   | amino acid<br>(glutamine/glutamate/aspartate?) |                                   |                                |
| A7Z8I6                                         | RBAM_029810 | PF03180   | methionine                                     |                                   |                                |

| A7Z1A1                                   | RBAM_003780 | PF00497   | amino acid<br>(glutamine/glutamate/aspartate?) |                                      |                                |
|------------------------------------------|-------------|-----------|------------------------------------------------|--------------------------------------|--------------------------------|
| A7Z9G7                                   | RBAM_033130 | PF13407   | xylose                                         |                                      |                                |
| A7Z2S6                                   | RBAM_009380 | PF03180   | methionine                                     |                                      |                                |
| A7Z1B5                                   | RBAM_003920 | PF00497   | amino acid<br>(glutamine/glutamate/aspartate?) |                                      |                                |
| A7Z134                                   | RBAM_003110 | PF01297   | manganese/zinc ion                             |                                      |                                |
| A7Z393                                   | RBAM_011050 | PF02608   | sugar                                          |                                      |                                |
| A7Z3D1                                   | RBAM_011430 | PF00496   | oligopeptide                                   |                                      |                                |
| A7Z1D1                                   | RBAM_004080 | PF01497   | iron-hydroxamate                               |                                      |                                |
| A7Z339                                   | RBAM_010510 | PF01497   | iron-hydroxamate                               |                                      |                                |
| A7Z8H1                                   | RBAM_029660 | PF01547   | sugar                                          |                                      |                                |
| A7Z738                                   | RBAM_024540 | PF00497   | amino acid<br>(glutamine/glutamate/aspartate?) |                                      |                                |
| A7Z7V1                                   | RBAM_027190 | PF01547   | sugar                                          |                                      |                                |
| A7ZA87                                   | RBAM_035840 | PF01497   | iron-hydroxamate                               |                                      |                                |
| A7Z8V8                                   | RBAM_031030 | PF04069   | glycine betaine                                |                                      |                                |
| A7Z8P9                                   | RBAM_030440 | PF01497   | iron-hydroxamate                               |                                      |                                |
| A7Z3B8                                   | RBAM_011300 | PF02608   | sugar                                          |                                      |                                |
| A7Z6G3                                   | RBAM_022280 | PF00497   | amino acid<br>(glutamine/glutamate/aspartate?) |                                      |                                |
| A7Z8N6                                   | RBAM_030310 | PF01497   | iron-hydroxamate                               |                                      |                                |
| <b><i>Synechocystis</i> sp. PCC 6803</b> |             |           |                                                |                                      |                                |
| Number of ORFs in the proteome: 3507     |             |           |                                                |                                      |                                |
| Number of SBPs: 27 (0.77% of total)      |             |           |                                                |                                      |                                |
| Lifestyle Summary: FRESH/MARINE WATERS   |             |           |                                                |                                      |                                |
| SeqID                                    | Gene Locus  | Pfam Code | Ligand prediction by TransportDB               | Experimentally identified ligands    | References/pdb accession codes |
| Q55200                                   | slI0679     | PF12849   | phosphate                                      |                                      |                                |
| Q55471                                   | slr0529     | PF01547   | Unclassified                                   | Glucosylglycerol, sucrose, trehalose | DOI: 10.1007/s002030000201     |

|        |         |         |                                                |                          |                                                                                                                                             |
|--------|---------|---------|------------------------------------------------|--------------------------|---------------------------------------------------------------------------------------------------------------------------------------------|
| P72827 | slr1295 | PF13416 | thiamin                                        | Iron (II) and iron (III) | doi: 10.1074/jbc.M704136200;<br>DOI: 10.1128/JB.183.9.2779-<br>2784.2001; DOI:<br>10.1093/pcp/pce106; DOI:<br>10.1099/00221287-148-10-3293; |
| Q55146 | sll0064 | PF00497 | amino acid<br>(glutamine/glutamate/aspartate?) |                          |                                                                                                                                             |
| P72610 | fecB    | PF01497 | Gene locus not annotated in Uniprot            |                          |                                                                                                                                             |
| Q55199 | pstS    | PF12849 | Gene locus not annotated in Uniprot            |                          |                                                                                                                                             |
| Q55633 | slr0341 | PF00497 | amino acid<br>(glutamine/glutamate/aspartate?) |                          |                                                                                                                                             |
| P73732 | slr1740 | PF00496 | dipeptide/oligopeptide                         |                          |                                                                                                                                             |
| P73325 | srrA    | PF01547 | Gene locus not annotated in Uniprot            |                          |                                                                                                                                             |
| P73615 | slr1865 | PF13416 | sugar                                          |                          |                                                                                                                                             |
| P74223 | glnH    | PF00497 | Gene locus not annotated in Uniprot            |                          |                                                                                                                                             |
| P73785 | pstS    | PF12849 | Gene locus not annotated in Uniprot            |                          |                                                                                                                                             |
| P73085 | zntC    | PF01297 | Gene locus not annotated in Uniprot            | Zinc                     | doi: 10.1016/j.jmb.2003.09.008;<br>doi: 10.1021/bi700763w                                                                                   |
| P72611 | fecB    | PF01497 | Gene locus not annotated in Uniprot            |                          |                                                                                                                                             |
| P72593 | fecB    | PF01497 | Gene locus not annotated in Uniprot            |                          |                                                                                                                                             |
| P73693 | sll1699 | PF00496 | dipeptide/oligopeptide                         |                          |                                                                                                                                             |
| P72598 | sll1202 | PF01497 | iron-hydroxamate                               |                          |                                                                                                                                             |
| P72707 | sll0224 | PF00497 | amino acid<br>(glutamine/glutamate/aspartate?) |                          |                                                                                                                                             |
| Q55723 | sll0606 | PF13458 | leucine/valine                                 |                          |                                                                                                                                             |
| Q55556 | sll0174 | PF00497 | amino acid<br>(glutamine/glutamate/aspartate?) |                          |                                                                                                                                             |
| P72750 | sll1037 | PF16868 | phosphonates                                   |                          |                                                                                                                                             |
| Q55387 | natB    | PF01094 | Gene locus not annotated in Uniprot            |                          |                                                                                                                                             |
| P73589 | dctP    | PF03480 | Gene locus not annotated in Uniprot            |                          |                                                                                                                                             |
| Q79EF9 | mntC    | PF01297 | Gene locus not annotated in Uniprot            | Manganese                | doi: 10.1016/j.jmb.2005.03.006;<br>doi: 10.1107/S174430911300153X                                                                           |

| Q55410                                       | sll0540           | PF12849          | phosphate                                      |                                          |                                       |
|----------------------------------------------|-------------------|------------------|------------------------------------------------|------------------------------------------|---------------------------------------|
| P74100                                       | slr1962           | PF03480          | C4-dicarboxylate                               |                                          |                                       |
| P73643                                       | sll1762           | PF00497          | amino acid<br>(glutamine/glutamate/aspartate?) |                                          |                                       |
|                                              |                   |                  |                                                |                                          |                                       |
| <b><i>Ralstonia solanacearum</i> GM11000</b> |                   |                  |                                                |                                          |                                       |
| Number of ORFs in the proteome: 5002         |                   |                  |                                                |                                          |                                       |
| Number of SBPs: 67 (1.34% of total)          |                   |                  |                                                |                                          |                                       |
| Lifestyle Summary: PLANT PATHOGEN            |                   |                  |                                                |                                          |                                       |
| <b>SeqID</b>                                 | <b>Gene Locus</b> | <b>Pfam Code</b> | <b>Ligand prediction by TransportDB</b>        | <b>Experimentally identified ligands</b> | <b>References/pdb accession codes</b> |
| Q8XU51                                       | RSc3342           | PF13458          | urea                                           |                                          |                                       |
| Q8XY77                                       | RSc1886           | PF00496          | dipeptide/oligopeptide                         |                                          |                                       |
| Q8Y255                                       | RSc0481           | PF00497          | amino acid<br>(glutamine/glutamate/aspartate?) |                                          |                                       |
| Q8XQC9                                       | RSp1298           | PF13458          | urea                                           |                                          |                                       |
| Q8Y071                                       | RSc1173           | PF00496          | oligopeptide                                   |                                          |                                       |
| Q8XPR3                                       | RSp1575           | PF00497          | amino acid<br>(glutamine/glutamate/aspartate?) |                                          |                                       |
| Q8XYM5                                       | RSc1733           | PF13416          | spermidine/putrescine                          |                                          |                                       |
| Q8Y0M6                                       | RSc1017           | PF13407          | ribose                                         |                                          |                                       |
| Q8XV97                                       | RSc2934           | PF13416          | iron(III)                                      |                                          |                                       |
| Q8XU03                                       | RSc3391           | PF09084          | nitrate/sulfonate/taurine                      |                                          |                                       |
| Q8XXL0                                       | RSc2103           | PF00497          | amino acid<br>(glutamine/glutamate/aspartate?) |                                          |                                       |
| Q8XX72                                       | RSc2244           | PF13458          | urea                                           |                                          |                                       |
| Q8Y0S0                                       | RSc0973           | PF00497          | amino acid<br>(glutamine/glutamate/aspartate?) |                                          |                                       |
| Q8XWN2                                       | RSc2441           | PF13458          | leucine/valine                                 |                                          |                                       |
| Q8XXM0                                       | RSc2093           | PF12849          | 2-aminoethylphosphonate                        |                                          |                                       |
| Q8XPP6                                       | RSp1592           | PF13458          | leucine/valine                                 |                                          |                                       |
| Q8XX55                                       | RSc2261           | PF00497          | amino acid<br>(glutamine/glutamate/aspartate?) |                                          |                                       |



|        |         |         |                                                |  |  |
|--------|---------|---------|------------------------------------------------|--|--|
| Q8XY84 | RSc1879 | PF13458 | leucine/valine                                 |  |  |
| Q8XSD7 | RSp0539 | PF13458 | leucine/valine                                 |  |  |
| Q8XXE8 | RSc2166 | PF03480 | C4-dicarboxylate                               |  |  |
| Q8XQS9 | RSp1140 | PF00497 | amino acid<br>(glutamine/glutamate/aspartate?) |  |  |
| Q8Y2Q2 | RSc0283 | PF01497 | iron-hydroxamate                               |  |  |
| Q8XVG7 | RSc2864 | PF13458 | leucine/valine                                 |  |  |
| Q8XQ39 | RSp1447 | PF13458 | leucine/valine                                 |  |  |
| Q8XUP0 | RSc3147 | PF13458 | leucine/valine                                 |  |  |
| Q8XUA6 | RSc3285 | PF13458 | urea                                           |  |  |
| Q8XUU5 | RSc3088 | PF03401 | tricarboxylate                                 |  |  |
| Q8XTU1 | RSp0013 | PF13458 | leucine/valine                                 |  |  |
| Q8XV68 | RSc2963 | PF03401 | tricarboxylate                                 |  |  |
| Q8XQA3 | RSp1383 | PF09084 | nitrate/sulfonate/taurine                      |  |  |
| Q8XXP3 | RSc2070 | PF13458 | urea                                           |  |  |
| Q8XV94 | RSc2937 | PF13416 | iron(III)                                      |  |  |
| Q8Y0X1 | RSc0922 | PF03180 | methionine                                     |  |  |
| Q8XQB6 | RSp1370 | PF05048 | Not annotated in TransportDB                   |  |  |
| Q8XWG2 | RSc2512 | PF00497 | amino acid<br>(glutamine/glutamate/aspartate?) |  |  |
| Q8XTY5 | RSc3410 | PF00497 | amino acid<br>(glutamine/glutamate/aspartate?) |  |  |
| Q8XU64 | RSc3329 | PF13458 | leucine/valine                                 |  |  |
| Q8XZL5 | RSc1380 | PF00496 | dipeptide/oligopeptide                         |  |  |
| Q8XSJ3 | RSp0481 | PF00497 | amino acid<br>(glutamine/glutamate/aspartate?) |  |  |
| Q8XWP5 | RSc2428 | PF13458 | leucine/valine                                 |  |  |
| Q8XPK7 | RSp1633 | PF13407 | xylose                                         |  |  |
| Q8XXD8 | RSc2177 | PF02608 | sugar                                          |  |  |
| Q8XU93 | RSc3300 | PF13458 | leucine/valine                                 |  |  |
| Q8XZY1 | RSc1264 | PF13416 | sugar                                          |  |  |
| Q8Y396 | RSc0084 | PF00497 | amino acid<br>(glutamine/glutamate/aspartate?) |  |  |

|                                              |                   |                  |                                                |                                          |                                       |
|----------------------------------------------|-------------------|------------------|------------------------------------------------|------------------------------------------|---------------------------------------|
| Q8XYK8                                       | RSc1750           | PF13458          | urea                                           |                                          |                                       |
| Q8XVG1                                       | RSc2870           | PF00496          | dipeptide/oligopeptide                         |                                          |                                       |
| Q8XUY2                                       | RSc3051           | PF01547          | sugar                                          |                                          |                                       |
| Q8XQ56                                       | RSp1430           | PF13458          | leucine/valine                                 |                                          |                                       |
| Q8Y3D6                                       | RSc0044           | PF00496          | dipeptide/oligopeptide                         |                                          |                                       |
| Q8XTC7                                       | RSp0186           | PF00497          | amino acid<br>(glutamine/glutamate/aspartate?) |                                          |                                       |
| Q8XTP2                                       | RSp0064           | PF04069          | glycine betaine                                |                                          |                                       |
| Q8XR42                                       | RSp1026           | PF13407          | rhamnose                                       |                                          |                                       |
| Q8XZ75                                       | RSc1529           | PF12849          | phosphate                                      |                                          |                                       |
| Q8XU83                                       | RSc3310           | PF12849          | phosphate                                      |                                          |                                       |
| Q8XXH0                                       | RSc2144           | PF01547          | sugar                                          |                                          |                                       |
| Q8XUX2                                       | RSc3061           | PF13458          | leucine/valine                                 | Leucine                                  | PDB: 3LOP                             |
| Q8XYL8                                       | RSc1740           | PF04392          | Unclassified                                   |                                          |                                       |
| Q8XWS6                                       | RSc2394           | PF01497          | iron-hydroxamate                               |                                          |                                       |
| Q8Y359                                       | RSc0122           | PF00497          | amino acid<br>(glutamine/glutamate/aspartate?) |                                          |                                       |
| Q8XWG4                                       | RSc2510           | PF03480          | C4-dicarboxylate                               |                                          |                                       |
| Q8XRC7                                       | RSp0931           | PF00497          | amino acid<br>(glutamine/glutamate/aspartate?) |                                          |                                       |
| Q8XX59                                       | RSc2257           | PF00497          | amino acid<br>(glutamine/glutamate/aspartate?) |                                          |                                       |
| Q8Y004                                       | RSc1241           | PF13407          | xylose                                         |                                          |                                       |
| Q8XU08                                       | RSc3386           | PF03180          | methionine                                     |                                          |                                       |
| Q8XXV7                                       | RSc2006           | PF00496          | dipeptide/oligopeptide                         |                                          |                                       |
| Q8XVS1                                       | RSc2758           | PF00532          | ribose                                         |                                          |                                       |
|                                              |                   |                  |                                                |                                          |                                       |
| <b>Bacillus subtilis subsp. subtilis 168</b> |                   |                  |                                                |                                          |                                       |
| Number of ORFs in the proteome: 4260         |                   |                  |                                                |                                          |                                       |
| Number of SBPs: 40 (0.94% of total)          |                   |                  |                                                |                                          |                                       |
| Lifestyle Summary: SOIL                      |                   |                  |                                                |                                          |                                       |
| <b>SeqID</b>                                 | <b>Gene Locus</b> | <b>Pfam Code</b> | <b>Ligand prediction by TransportDB</b>        | <b>Experimentally identified ligands</b> | <b>References/pdb accession codes</b> |

|        |          |         |                                                |                                                                                                                         |                                                                                                                 |
|--------|----------|---------|------------------------------------------------|-------------------------------------------------------------------------------------------------------------------------|-----------------------------------------------------------------------------------------------------------------|
| O34805 | BSU33180 | PF01497 | iron-hydroxamate                               |                                                                                                                         |                                                                                                                 |
| P42199 | BSU03610 | PF00497 | amino acid<br>(glutamine/glutamate/aspartate?) | Cysteine                                                                                                                | DOI: 10.1128/JB.186.15.4875-4884.2004                                                                           |
| COSP94 | BSU10330 | PF01497 | iron-hydroxamate                               | Siderofores                                                                                                             | <a href="https://doi.org/10.1046/j.1365-2958.2002.03113.x">https://doi.org/10.1046/j.1365-2958.2002.03113.x</a> |
| P54941 | BSU39610 | PF01497 | iron-hydroxamate                               | Siderofores                                                                                                             | DOI: 10.1128/JB.188.10.3664-3673.2006                                                                           |
| P54952 | BSU39500 | PF00497 | amino acid<br>(glutamine/glutamate/aspartate?) | Cysteine                                                                                                                | DOI: 10.1128/JB.186.15.4875-4884.2004                                                                           |
| P54594 | BSU09110 | PF03180 | methionine                                     | Copper                                                                                                                  | DOI: 10.1099/13500872-142-11-3021                                                                               |
| Q795R2 | BSU30160 | PF13416 | sugar                                          |                                                                                                                         |                                                                                                                 |
| O32156 | BSU32600 | PF01547 | sugar                                          |                                                                                                                         |                                                                                                                 |
| P40400 | BSU08840 | PF09084 | glycine betaine                                | Alkanesulfonates, taurine, isethionate, sulfoacetate                                                                    | DOI: 10.1099/00221287-144-9-2555                                                                                |
| O34439 | BSU07600 | PF03401 | tricarboxylate                                 |                                                                                                                         |                                                                                                                 |
| P94421 | BSU03830 | PF01497 | iron-hydroxamate                               | Siderophore (petrobactin)                                                                                               | DOI: 10.1073/pnas.0904793106                                                                                    |
| O31518 | BSU06970 | PF13416 | sugar                                          | 2,6-anhydro-3-deoxy-L-threo-hex-2-enonic acid-(1-2)-[beta-D-galactopyranose-(1-4)]alpha-L-rhamnopyranose (trisacharide) | PDB: 5Z6B; DOI: 10.1128/AEM.00147-07                                                                            |
| O34335 | BSU30270 | PF01547 | sugar                                          | Sugars of raffinose family                                                                                              | DOI: 10.1128/JB.00109-19                                                                                        |
| O34852 | BSU29370 | PF00497 | amino acid<br>(glutamine/glutamate/aspartate?) | Cysteine                                                                                                                | DOI: 10.1128/JB.186.15.4875-4884.2004                                                                           |
| P42400 | BSU03380 | PF00497 | amino acid<br>(glutamine/glutamate/aspartate?) |                                                                                                                         |                                                                                                                 |

|        |          |         |                    |                                                                |                                                                                                                                                                                                            |
|--------|----------|---------|--------------------|----------------------------------------------------------------|------------------------------------------------------------------------------------------------------------------------------------------------------------------------------------------------------------|
| O31567 | BSU08440 | PF01497 | iron-hydroxamate   | Siderofore                                                     | <a href="https://doi.org/10.1046/j.1365-2958.2002.03113.x">https://doi.org/10.1046/j.1365-2958.2002.03113.x</a>                                                                                            |
| O34966 | BSU02850 | PF01297 | manganese/zinc ion | Manganese, zinc                                                | PDB: 2O1E; DOI: 10.1128/JB.180.22.5815-5821.1998; DOI: 10.1128/JB.184.23.6508-6514.2002; DOI: 10.1093/jb/mvr098                                                                                            |
| O34348 | BSU07520 | PF01497 | iron-hydroxamate   | Sidorofore                                                     | DOI: 10.1128/JB.188.10.3664-3673.2006                                                                                                                                                                      |
| O06989 | BSU34610 | PF13416 | sugar (maltose?)   | Maltose                                                        | DOI: 10.1128/JB.00213-06                                                                                                                                                                                   |
| P37580 | BSU33320 | PF01497 | iron-hydroxamate   | Sidorofore, iron-hydroxamate                                   | DOI: 10.1128/JB.188.10.3664-3673.2006; DOI: 10.1111/j.1365-2958.1993.tb01208.x                                                                                                                             |
| O32243 | BSU33810 | PF04069 | glycine betaine    | Carnitine, glycine betaine, choline, ectoine and arsenobetaine | doi: 10.1042/BJ20102097; doi: 10.1016/j.jmb.2011.05.037; doi: 10.1111/1462-2920.13999; DOI: 10.1046/j.1365-2958.1999.01354.x; DOI: 10.1128/jb.178.17.5071-5079.1996; DOI: 10.1128/jb.178.17.5071-5079.1996 |
| O05252 | BSU31540 | PF02608 | sugar              | Guanosine                                                      | DOI: 10.1128/JB.05899-11                                                                                                                                                                                   |
| Q45462 | BSU33710 | PF04069 | glycine betaine    | Glycine betaine, carnitine, choline                            | PDB: 6EYG, 6EYL, 6EYQ; DOI: 10.1046/j.1365-2958.1999.01354.x; DOI: 10.1128/jb.177.23.6874-6880.1995; DOI: 10.1128/JB.06642-11                                                                              |

|        |                   |         |                                                |                                                                                       |                                                                                                                       |
|--------|-------------------|---------|------------------------------------------------|---------------------------------------------------------------------------------------|-----------------------------------------------------------------------------------------------------------------------|
| P24141 | BSU11430          | PF00496 | oligopeptide                                   | Oligopeptides                                                                         | DOI: 10.1111/j.1365-2958.1991.tb01838.x; DOI: 10.1128/jb.173.4.1388-1398.1991                                         |
| O34385 | BSU30770          | PF01297 | manganese/zinc ion                             | Manganese                                                                             | DOI: 10.1046/j.1365-2958.2000.01811.x; DOI: 10.1046/j.1365-2958.2003.03648.x                                          |
| P37966 | BSU07100          | PF01547 | sugar                                          |                                                                                       |                                                                                                                       |
| P46922 | BSU03000          | PF04069 | glycine betaine                                | Glycine betaine, proline betaine, sulfobetaine dimethylsulfonioacetate, arsenobetaine | doi: 10.1016/j.jmb.2005.12.085; doi: 10.1128/JB.00346-08; doi: 10.1111/1462-2920.13999; DOI: 10.1074/jbc.270.28.16701 |
| O32167 | BSU32730          | PF03180 | methionine                                     | Methionine                                                                            | DOI: 10.1016/j.resmic.2003.11.008                                                                                     |
| O34406 | BSU29380          | PF00497 | amino acid<br>(glutamine/glutamate/aspartate?) | Cysteine                                                                              |                                                                                                                       |
| P54535 | BSU23980          | PF00497 | amino acid<br>(glutamine/glutamate/aspartate?) | Arginine                                                                              | DOI: 10.1186/gb-2001-2-6-research0019                                                                                 |
| P40409 | BSU01630          | PF01497 | iron-hydroxamate                               | Ferri-Bacillibactin, Ferri-Enterobactin, triscatecholate siderophore mimic mecam      | doi: 10.1002/anie.200902495; doi: 10.1016/j.chembiol.2011.05.006; DOI: 10.1111/j.1365-2958.2007.05905.x               |
| P42061 | BSU11381/BSU11382 | PF00496 | dipeptide/oligopeptide                         | Nonapeptide VDSKNTSSW                                                                 | doi: 10.1016/j.jmb.2004.10.089; DOI: 10.1111/j.1365-2958.1994.tb00436.x                                               |
| P26906 | BSU12960          | PF00496 | oligopeptide                                   |                                                                                       |                                                                                                                       |
| O32436 | BSU11300          | PF02608 | sugar                                          |                                                                                       |                                                                                                                       |
| P96600 | BSU04440          | PF03480 | C4-dicarboxylate                               | Fumarate and succinate                                                                | doi: 10.1099/00221287-146-2-263                                                                                       |
| O34563 | BSU27440          | PF00497 | amino acid<br>(glutamine/glutamate/aspartate?) |                                                                                       |                                                                                                                       |

|                                                      |                   |                  |                                                |                                                                                                                            |                                             |
|------------------------------------------------------|-------------------|------------------|------------------------------------------------|----------------------------------------------------------------------------------------------------------------------------|---------------------------------------------|
| P94528                                               | BSU28750          | PF01547          | sugar                                          | Arabinobiose,<br>arabinotriose,<br>arabinotetraose,<br>maltoriose, maltotetraose,<br>maltopentaose,<br>debranched arabinan | doi: 10.1128/JB.00832-10                    |
| O07009                                               | BSU34160          | PF13416          | Unclassified                                   | maltoheptaose, $\alpha$ -<br>cyclodextrin, $\beta$ -<br>cyclodextrin, $\gamma$ -cyclodextrin                               | doi: 10.1111/j.1574-<br>6968.2001.tb10862.x |
| P36949                                               | BSU35960          | PF13407          | xylose                                         | Ribose                                                                                                                     | doi: 10.1099/13500872-140-8-<br>1829        |
| P46338                                               | BSU24990          | PF12849          | phosphate                                      | Phosphate                                                                                                                  | doi: 10.1128/jb.179.8.2534-<br>2539.1997    |
| <b><i>Geobacillus thermodenitrificans</i> NG80-2</b> |                   |                  |                                                |                                                                                                                            |                                             |
| Number of ORFs in the proteome: 3424                 |                   |                  |                                                |                                                                                                                            |                                             |
| Number of SBPs: 51 (1.49% of total)                  |                   |                  |                                                |                                                                                                                            |                                             |
| Lifestyle Summary: OIL RESERVOIR                     |                   |                  |                                                |                                                                                                                            |                                             |
| <b>SeqID</b>                                         | <b>Gene Locus</b> | <b>Pfam Code</b> | <b>Ligand prediction by TransportDB</b>        | <b>Experimentally identified ligands</b>                                                                                   | <b>References/pdb accession codes</b>       |
| A4IQM7                                               | GTNG_2282         | PF00497          | amino acid<br>(glutamine/glutamate/aspartate?) |                                                                                                                            |                                             |
| A4IPU7                                               | GTNG_1999         | PF00496          | dipeptide/oligopeptide                         |                                                                                                                            |                                             |
| A4ISL8                                               | GTNG_2977         | PF16868          | phosphonates                                   |                                                                                                                            |                                             |
| A4IN11                                               | GTNG_1345         | PF03180          | methionine                                     |                                                                                                                            |                                             |
| A4IKK6                                               | GTNG_0478         | PF00496          | dipeptide/oligopeptide                         |                                                                                                                            |                                             |
| A4ITB6                                               | GTNG_3227         | PF13416          | 2-aminoethylphosphonate                        |                                                                                                                            |                                             |
| A4ISJ0                                               | GTNG_2949         | PF03180          | methionine                                     |                                                                                                                            |                                             |
| A4IL04                                               | GTNG_0626         | PF13416          | spermidine/putrescine                          |                                                                                                                            |                                             |
| A4IJQ4                                               | GTNG_0174         | PF01497          | iron-hydroxamate                               |                                                                                                                            |                                             |
| A4IP83                                               | GTNG_1773         | PF01547          | sugar                                          |                                                                                                                            |                                             |

|        |           |         |                                                |  |  |
|--------|-----------|---------|------------------------------------------------|--|--|
| A4IT20 | GTNG_3129 | PF13407 | rhamnose                                       |  |  |
| A4IPA7 | GTNG_1801 | PF13407 | xylose                                         |  |  |
| A4IRZ5 | GTNG_2754 | PF09084 | nitrate/sulfonate/taurine                      |  |  |
| A4IT97 | GTNG_3206 | PF13416 | sugar                                          |  |  |
| A4IPL6 | GTNG_1915 | PF04392 | Unclassified                                   |  |  |
| A4IS05 | GTNG_2764 | PF01297 | manganese/zinc ion                             |  |  |
| A4IPC9 | GTNG_1823 | PF13416 | sugar                                          |  |  |
| A4IMF7 | GTNG_1137 | PF02608 | sugar                                          |  |  |
| A4IKD2 | GTNG_0404 | PF13416 | sugar                                          |  |  |
| A4IMY3 | GTNG_1317 | PF01497 | iron-hydroxamate                               |  |  |
| A4IPB0 | GTNG_1804 | PF13407 | rhamnose                                       |  |  |
| A4ITD1 | GTNG_3244 | PF13416 | sugar                                          |  |  |
| A4IPE9 | GTNG_1843 | PF03401 | tricarboxylate                                 |  |  |
| A4IT17 | GTNG_3126 | PF01547 | sugar                                          |  |  |
| A4ISH1 | GTNG_2930 | PF13458 | leucine/valine                                 |  |  |
| A4IKY9 | GTNG_0611 | PF13416 | sugar (maltose?)                               |  |  |
| A4IQY8 | GTNG_2397 | PF12849 | phosphate                                      |  |  |
| A4IPB9 | GTNG_1813 | PF13407 | ribose                                         |  |  |
| A4ITR8 | GTNG_3385 | PF00497 | amino acid<br>(glutamine/glutamate/aspartate?) |  |  |
| A4IPY4 | GTNG_2036 | PF09084 | phosphonates                                   |  |  |
| A4ISM5 | GTNG_2984 | PF13458 | leucine/valine                                 |  |  |
| A4ITG8 | GTNG_3283 | PF00496 | dipeptide/oligopeptide                         |  |  |
| A4ISE1 | GTNG_2900 | PF01497 | iron-hydroxamate                               |  |  |
| A4IQE4 | GTNG_2199 | PF01497 | iron-hydroxamate                               |  |  |
| A4IKV4 | GTNG_0576 | PF04392 | Unclassified                                   |  |  |
| A4IRK2 | GTNG_2611 | PF09084 | glycine betaine                                |  |  |
| A4IPA0 | GTNG_1794 | PF01547 | sugar                                          |  |  |
| A4IK07 | GTNG_0277 | PF04069 | glycine betaine                                |  |  |
| A4IPX0 | GTNG_2022 | PF01547 | sugar                                          |  |  |
| A4IP90 | GTNG_1780 | PF01547 | sugar                                          |  |  |
| A4IP42 | GTNG_1732 | PF05048 | Not annotated in TransportDB                   |  |  |
| A4IMU1 | GTNG_1275 | PF01497 | iron-hydroxamate                               |  |  |

| A4IL67                                         | GTNG_0691  | PF00496   | oligopeptide                                   |                                     |                                                                          |
|------------------------------------------------|------------|-----------|------------------------------------------------|-------------------------------------|--------------------------------------------------------------------------|
| A4IT61                                         | GTNG_3170  | PF13407   | xylose                                         |                                     |                                                                          |
| A4ILLO                                         | GTNG_0836  | PF13407   | rhamnose                                       |                                     |                                                                          |
| A4INH9                                         | GTNG_1513  | PF13458   | leucine/valine                                 |                                     |                                                                          |
| A4ILJ8                                         | GTNG_0824  | PF01547   | sugar                                          |                                     |                                                                          |
| A4IPP7                                         | GTNG_1946  | PF03480   | C4-dicarboxylate                               |                                     |                                                                          |
| A4IPH8                                         | GTNG_1874  | PF03480   | C4-dicarboxylate                               |                                     |                                                                          |
| A4IPH6                                         | GTNG_1870  | PF03480   | C4-dicarboxylate                               |                                     |                                                                          |
| A4IKN1                                         | GTNG_0503  | PF03480   | C4-dicarboxylate                               |                                     |                                                                          |
| <b><i>Mycobacterium tuberculosis H37Rv</i></b> |            |           |                                                |                                     |                                                                          |
| Number of ORFs in the proteome: 3993           |            |           |                                                |                                     |                                                                          |
| Number of SBPs: 17 (0.43% of total)            |            |           |                                                |                                     |                                                                          |
| Lifestyle Summary: HUMAN/ANIMAL PATHOGEN       |            |           |                                                |                                     |                                                                          |
| SeqID                                          | Gene Locus | Pfam Code | Ligand prediction by TransportDB               | Experimentally identified ligands   | References/pdb accession codes                                           |
| P9WL77                                         | Rv2585c    | PF00496   | dipeptide/oligopeptide                         |                                     |                                                                          |
| P9WGU5                                         | Rv1280c    | PF00496   | dipeptide/oligopeptide                         |                                     |                                                                          |
| P9WGT7                                         | Rv0928     | PF12849   | phosphate                                      | Phosphate                           | doi: 10.1002/prot.24548; doi: 10.1016/j.tube.2010.09.004                 |
| P9WGU1                                         | Rv0934     | PF12849   | phosphate                                      | Phosphate                           | doi: 10.1128/IAI.73.3.1898-1902.2005; doi: 10.1016/s0969-2126(03)00109-6 |
| P9WGU7                                         | Rv1166     | PF00496   | dipeptide/oligopeptide                         |                                     |                                                                          |
| P9WGT9                                         | Rv0932c    | PF12849   | phosphate                                      | Phosphate                           | doi: 10.1128/IAI.73.3.1898-1902.2005                                     |
| P9WGU9                                         | Rv1235     | PF01547   | sugar                                          | Trehalose                           | doi: 10.1073/pnas.1014642108                                             |
| P96257                                         | Rv0411c    | PF00497   | amino acid<br>(glutamine/glutamate/aspartate?) | Aspartate, glutamate,<br>asparagine | doi: 10.1128/mBio.00931-18                                               |
| O53291                                         | Rv3044     | PF01497   | iron-hydroxamate                               |                                     |                                                                          |
| O53485                                         | Rv2041c    | PF01547   | sugar                                          |                                     |                                                                          |



| P71619                                   | Rv2833c    | PF13416   | sugar                            | Glycerophosphocholine, glycerophosphoserine, glycerophosphoethanolamine, glycerophosphoinositol, glycerophosphoinositol-4-phosphate | doi: 10.1021/acschembio.9b00204 |
|------------------------------------------|------------|-----------|----------------------------------|-------------------------------------------------------------------------------------------------------------------------------------|---------------------------------|
| O07257                                   | Rv2059     | PF01297   | manganese/zinc ion               |                                                                                                                                     |                                 |
| P71894                                   | Rv2318     | PF01547   | sugar                            | D-glucosamine, D-galactosamine, D-mannosamine, muramic acid, D-glucosamine-6-phosphate                                              | doi: 10.1098/rsob.160105        |
| L7N6B2                                   | Rv0265c    | PF01497   | iron-hydroxamate                 |                                                                                                                                     |                                 |
| O69725                                   | Rv3759c    | PF04069   | glycine betaine                  |                                                                                                                                     |                                 |
| O50459                                   | Rv1244     | PF04069   | glycine betaine                  |                                                                                                                                     |                                 |
| I6X811                                   | Rv3666c    | PF00496   | oligopeptide                     | Tetrapeptide (Ser-Ser-Val-Thr), tetrapeptide (Val-Val-Val-Val), heme and hemoglobin                                                 | doi: 10.1038/s41467-019-12109-5 |
| <b>Borrelia burgdORFseri B31</b>         |            |           |                                  |                                                                                                                                     |                                 |
| Number of ORFs in the proteome: 1290     |            |           |                                  |                                                                                                                                     |                                 |
| Number of SBPs: 12 (0.93% of total)      |            |           |                                  |                                                                                                                                     |                                 |
| Lifestyle Summary: HUMAN/ANIMAL PATHOGEN |            |           |                                  |                                                                                                                                     |                                 |
| SeqID                                    | Gene Locus | Pfam Code | Ligand prediction by TransportDB | Experimentally identified ligands                                                                                                   | References/pdb accession codes  |
| O51233                                   | BB_0215    | PF12849   | phosphate                        | Phosphate                                                                                                                           | doi: 10.1002/pro.2406           |
| POCL55                                   | BB_0385    | PF02608   | sugar                            |                                                                                                                                     |                                 |
| Q45010                                   | BB_0383    | PF02608   | sugar                            |                                                                                                                                     |                                 |
| Q45011                                   | BB_0382    | PF02608   | sugar                            |                                                                                                                                     |                                 |
| POCL65                                   | BB_0384    | PF02608   | sugar                            |                                                                                                                                     |                                 |
| O51298                                   | BB_0319    | PF02608   | sugar                            |                                                                                                                                     |                                 |

| O51308                                                                                             | BB_0330      | PF00496   | oligopeptide                                   |                                   |                                |
|----------------------------------------------------------------------------------------------------|--------------|-----------|------------------------------------------------|-----------------------------------|--------------------------------|
| O51584                                                                                             | BB_0639      | PF13416   | spermidine/putrescine                          |                                   |                                |
| H7C7K8                                                                                             | BB_B16       | PF00496   | oligopeptide                                   | Peptide of unknown sequence       | PDB: 4GL8                      |
| O51169                                                                                             | BB_0144      | PF04069   | glycine betaine                                | Glycine-betaine                   | PDB: 3TMG                      |
| O51307                                                                                             | BB_0328      | PF00496   | oligopeptide                                   |                                   |                                |
| O50927                                                                                             | BB_A34       | PF00496   | oligopeptide                                   |                                   |                                |
| <b><i>Caulobacter crescentus</i> CB15</b>                                                          |              |           |                                                |                                   |                                |
| Number of ORFs in the proteome: 3720                                                               |              |           |                                                |                                   |                                |
| Number of SBPs: 9 (0.24% of total)                                                                 |              |           |                                                |                                   |                                |
| Lifestyle: Isolated from a pond water in the USA. Free-living non-pathogenic environmental isolate |              |           |                                                |                                   |                                |
| Lifestyle Summary: FRESH/MARINE WATERS                                                             |              |           |                                                |                                   |                                |
| SeqID                                                                                              | Gene Locus   | Pfam Code | Ligand prediction by TransportDB               | Experimentally identified ligands | References/pdb accession codes |
| Q9A8A8                                                                                             | CC_1446      | PF03480   | C4-dicarboxylate                               |                                   |                                |
| Q9A3R5                                                                                             | CC_3137      | PF13416   | spermidine/putrescine                          |                                   |                                |
| Q9A536                                                                                             | CC_2633      | PF09084   | nitrate/sulfonate/taurine                      |                                   |                                |
| Q9A793                                                                                             | CC_1833      | PF09084   | nitrate/sulfonate/taurine                      |                                   |                                |
| Q9A8B3                                                                                             | CC_1441      | PF00497   | amino acid<br>(glutamine/glutamate/aspartate?) |                                   |                                |
| Q9A904                                                                                             | CC_1191      | PF01497   | iron-hydroxamate                               |                                   |                                |
| Q9A507                                                                                             | CC_2664      | PF03180   | methionine                                     |                                   |                                |
| Q9A849                                                                                             | CC_1515      | PF12849   | phosphate                                      |                                   |                                |
| Q9A9V2                                                                                             | CC_0859      | PF13407   | xylose                                         |                                   |                                |
| <b><i>Aliivibrio fischeri</i> MJ11</b>                                                             |              |           |                                                |                                   |                                |
| Number of ORFs in the proteome: 4034                                                               |              |           |                                                |                                   |                                |
| Number of SBPs: 39 (0.97% of total)                                                                |              |           |                                                |                                   |                                |
| Lifestyle Summary: ANIMAL SYMBIONT                                                                 |              |           |                                                |                                   |                                |
| SeqID                                                                                              | Gene Locus   | Pfam Code | Ligand prediction by TransportDB               | Experimentally identified ligands | References/pdb accession codes |
| B5ESA5                                                                                             | VFMJ11_A0037 | PF03480   | C4-dicarboxylate                               |                                   |                                |

|        |              |         |                                                |  |  |
|--------|--------------|---------|------------------------------------------------|--|--|
| B5EVA6 | VFMJ11_A1076 | PF13416 | sugar (maltose?)                               |  |  |
| B5FBG2 | VFMJ11_0727  | PF13407 | ribose                                         |  |  |
| B5FCU6 | VFMJ11_2644  | PF00496 | dipeptide/oligopeptide                         |  |  |
| B5ET94 | VFMJ11_A0357 | PF09084 | nitrate/sulfonate/taurine                      |  |  |
| B5ET84 | VFMJ11_A0347 | PF00496 | dipeptide/oligopeptide                         |  |  |
| B5FEJ7 | VFMJ11_1543  | PF13407 | xylose                                         |  |  |
| B5FET0 | VFMJ11_1626  | PF00497 | amino acid<br>(glutamine/glutamate/aspartate?) |  |  |
| B5FGF3 | VFMJ11_0262  | PF16868 | glycine betaine                                |  |  |
| B5FA26 | VFMJ11_2146  | PF13416 | sugar (maltose?)                               |  |  |
| B5FBD5 | VFMJ11_0700  | PF00496 | dipeptide/oligopeptide                         |  |  |
| B5FE48 | VFMJ11_1394  | PF13416 | spermidine/putrescine                          |  |  |
| B5FBD8 | VFMJ11_0703  | PF03180 | methionine                                     |  |  |
| B5EUT7 | VFMJ11_A0907 | PF01497 | iron-hydroxamate                               |  |  |
| B5FE49 | VFMJ11_1395  | PF13416 | spermidine/putrescine                          |  |  |
| B5FF16 | VFMJ11_1697  | PF00497 | amino acid<br>(glutamine/glutamate/aspartate?) |  |  |
| B5FF39 | VFMJ11_1720  | PF12849 | phosphate                                      |  |  |
| B5FE02 | VFMJ11_1348  | PF00497 | amino acid<br>(glutamine/glutamate/aspartate?) |  |  |
| B5FBE5 | VFMJ11_0710  | PF00496 | dipeptide/oligopeptide                         |  |  |
| B5FF26 | VFMJ11_1707  | PF00496 | oligopeptide                                   |  |  |
| B5ETU9 | VFMJ11_A0568 | PF12849 | phosphate                                      |  |  |
| B5FF53 | VFMJ11_1734  | PF00532 | trimethylamine N-oxide                         |  |  |
| B5EUV6 | VFMJ11_A0926 | PF13416 | sugar (maltose?)                               |  |  |
| B5EUY4 | VFMJ11_A0954 | PF01497 | iron-hydroxamate                               |  |  |
| B5FDV8 | VFMJ11_1302  | PF01497 | iron-hydroxamate                               |  |  |
| B5FB45 | VFMJ11_2323  | PF04348 | Not annotated in TransportDB                   |  |  |
| B5FBV6 | VFMJ11_2487  | PF01297 | zinc                                           |  |  |
| B5EST4 | VFMJ11_A0195 | PF01497 | iron-hydroxamate                               |  |  |
| B5FAM2 | VFMJ11_2247  | PF00496 | dipeptide/oligopeptide                         |  |  |
| B5FDH2 | VFMJ11_1166  | PF16868 | phosphonates                                   |  |  |
| B5FA03 | VFMJ11_2123  | PF12849 | phosphate                                      |  |  |

|                                             |                   |                  |                                                |                                                                                                                                                                       |                                       |
|---------------------------------------------|-------------------|------------------|------------------------------------------------|-----------------------------------------------------------------------------------------------------------------------------------------------------------------------|---------------------------------------|
| B5FEV2                                      | VFMJ11_0008       | PF00497          | amino acid<br>(glutamine/glutamate/aspartate?) |                                                                                                                                                                       |                                       |
| B5FBY7                                      | VFMJ11_0822       | PF04069          | glycine betaine                                |                                                                                                                                                                       |                                       |
| B5EVC5                                      | VFMJ11_A1095      | PF01497          | iron-hydroxamate                               |                                                                                                                                                                       |                                       |
| B5FEE0                                      | VFMJ11_1486       | PF12849          | tungsten                                       |                                                                                                                                                                       |                                       |
| B5FG88                                      | VFMJ11_1917       | PF03401          | tricarboxylate                                 |                                                                                                                                                                       |                                       |
| B5FC33                                      | VFMJ11_0868       | PF01297          | zinc                                           |                                                                                                                                                                       |                                       |
| B5ESK9                                      | VFMJ11_A0120      | PF13416          | spermidine/putrescine                          |                                                                                                                                                                       |                                       |
| B5ETG7                                      | VFMJ11_A0430      | PF00497          | amino acid<br>(glutamine/glutamate/aspartate?) |                                                                                                                                                                       |                                       |
| <b><i>Streptomyces coelicolor</i> A3(2)</b> |                   |                  |                                                |                                                                                                                                                                       |                                       |
| Number of ORFs in the proteome: 8038        |                   |                  |                                                |                                                                                                                                                                       |                                       |
| Number of SBPs: 93 (1.16% of total)         |                   |                  |                                                |                                                                                                                                                                       |                                       |
| Lifestyle Summary: SOIL                     |                   |                  |                                                |                                                                                                                                                                       |                                       |
| <b>SeqID</b>                                | <b>Gene Locus</b> | <b>Pfam Code</b> | <b>Ligand prediction by TransportDB</b>        | <b>Experimentally identified ligands</b>                                                                                                                              | <b>References/pdb accession codes</b> |
| O50499                                      | SCO6005           | PF01547          | N-acetylglucosamine                            | N,N'-diacetylchitobiose, N-acetylglucosamine                                                                                                                          | doi: 10.1264/jsme2.ME17172            |
| Q9K491                                      | SCO5232           | PF01547          | sugar                                          | N-acetylglucosamine, N,N'-Diacetylchitobiose, N,N',N'''-triacetylchitotriose, N,N',N''',N'''-tetraacetylchitotetraose, N,N',N''',N''',N' '''-pentaacetylchitopentaose | doi: 10.1128/AEM.02612-06             |
| O69944                                      | SCO6569           | PF13407          | xylose                                         |                                                                                                                                                                       |                                       |
| Q9RK79                                      | SCO0531           | PF01547          | sugar                                          |                                                                                                                                                                       |                                       |
| Q9RJA4                                      | SCO0660           | PF01547          | sugar                                          |                                                                                                                                                                       |                                       |
| Q8CJP2                                      | SCO6114           | PF00496          | dipeptide/oligopeptide                         |                                                                                                                                                                       |                                       |
| O50503                                      | SCO6009           | PF13407          | xylose                                         |                                                                                                                                                                       |                                       |

|        |         |         |                                                |  |  |
|--------|---------|---------|------------------------------------------------|--|--|
| Q7AKN1 | SCO2933 | PF04069 | glycine betaine                                |  |  |
| Q9L2K2 | SCO0706 | PF13458 | urea                                           |  |  |
| Q9F3F1 | SCO7606 | PF13458 | leucine/valine                                 |  |  |
| Q9L027 | SCO7028 | PF01547 | sugar                                          |  |  |
| Q9EX42 | SCO0996 | PF01497 | cobalamin                                      |  |  |
| Q9RJG1 | SCO0473 | PF01297 | zinc                                           |  |  |
| O69956 | SCO5780 | PF16868 | phosphonates                                   |  |  |
| Q9RKQ6 | SCO2272 | PF01497 | iron-hydroxamate                               |  |  |
| Q9K443 | SCO1056 | PF13416 | sugar                                          |  |  |
| Q7AKD7 | SCO7013 | PF01547 | sugar                                          |  |  |
| Q9RCZ6 | SCO0914 | PF01547 | sugar                                          |  |  |
| Q9K3Y9 | SCO1344 | PF00496 | dipeptide/oligopeptide                         |  |  |
| Q9KZV9 | SCO4142 | PF12849 | phosphate                                      |  |  |
| O86596 | SCO6231 | PF01547 | sugar                                          |  |  |
| Q9ADH5 | SCO6088 | PF01547 | sugar                                          |  |  |
| Q9F353 | SCO5117 | PF00496 | oligopeptide                                   |  |  |
| Q9L057 | SCO2978 | PF01547 | sugar                                          |  |  |
| Q9X9X4 | SCO1898 | PF01547 | sugar                                          |  |  |
| Q9KXV5 | SCO4286 | PF13416 | sugar                                          |  |  |
| Q9F3C0 | SCO7555 | PF13416 | sugar                                          |  |  |
| O86690 | SCO6644 | PF00496 | dipeptide/oligopeptide                         |  |  |
| Q9L216 | SCO6816 | PF12849 | phosphate                                      |  |  |
| Q9L263 | SCO2664 | PF00497 | amino acid<br>(glutamine/glutamate/aspartate?) |  |  |
| Q7AKP1 | SCO2231 | PF01547 | sugar (maltose?)                               |  |  |
| Q9L1U8 | SCO2946 | PF13416 | sugar                                          |  |  |
| Q9FBS5 | SCO7167 | PF13416 | sugar                                          |  |  |
| O50494 | SCO5776 | PF00497 | amino acid<br>(glutamine/glutamate/aspartate?) |  |  |
| Q9KYS9 | SCO5686 | PF01547 | sugar                                          |  |  |
| Q9K434 | SCO1065 | PF01547 | sugar                                          |  |  |
| Q9S1S7 | SCO0065 | PF01547 | sugar                                          |  |  |
| Q9RKH6 | SCO3456 | PF13416 | spermidine/putrescine                          |  |  |

|        |         |         |                        |                |                             |
|--------|---------|---------|------------------------|----------------|-----------------------------|
| Q93RU4 | SCO1882 | PF01547 | sugar                  |                |                             |
| Q9X832 | SCO6065 | PF04069 | glycine betaine        |                |                             |
| Q9S2J5 | SCO2008 | PF13458 | leucine/valine         |                |                             |
| O86636 | SCO5716 | PF00496 | dipeptide/oligopeptide |                |                             |
| Q9RJV8 | SCO0352 | PF01547 | sugar                  |                |                             |
| O54107 | SCO5911 | PF00496 | dipeptide/oligopeptide |                |                             |
| Q9KXY7 | SCO2428 | PF12849 | phosphate              |                |                             |
| Q93JA7 | SCO7489 | PF13416 | sugar                  |                |                             |
| Q9K3U4 | SCO4401 | PF13458 | leucine/valine         |                |                             |
| Q9ZBG2 | SCO6451 | PF00496 | dipeptide/oligopeptide |                |                             |
| O87856 | SCO6601 | PF01547 | sugar                  |                |                             |
| Q8CK63 | SCO0273 | PF01547 | sugar                  |                |                             |
| Q9AK41 | SCO4885 | PF02608 | sugar                  |                |                             |
| Q9EWY8 | SCO1138 | PF03401 | tricarboxylate         |                |                             |
| Q9F3B2 | SCO7563 | PF00496 | dipeptide/oligopeptide |                |                             |
| Q9RL34 | SCO0453 | PF01547 | sugar                  |                |                             |
| O86741 | SCO5658 | PF13416 | spermidine/putrescine  |                |                             |
| Q9RJ53 | SCO1655 | PF00496 | dipeptide/oligopeptide |                |                             |
| Q9RK12 | SCO0494 | PF01497 | iron-hydroxamate       |                |                             |
| Q9X861 | SCO3505 | PF01547 | sugar                  |                |                             |
| Q9KYQ3 | SCO3667 | PF13407 | xylose                 |                |                             |
| Q9L074 | SCO2780 | PF01497 | iron-hydroxamate       | Ferrioxamine B | doi: 10.1098/rstb.2017.0068 |
| Q9K3I8 | SCO4832 | PF04069 | glycine betaine        |                |                             |
| Q9L1L4 | SCO5430 | PF01547 | sugar                  |                |                             |
| Q9S2C3 | SCO0290 | PF01547 | sugar                  |                |                             |
| Q9AK42 | SCO4884 | PF02608 | sugar                  |                |                             |
| Q9L1C5 | SCO1557 | PF03180 | methionine             |                |                             |
| Q9RDN3 | SCO2404 | PF13407 | xylose                 |                |                             |
| Q9FBZ7 | SCO7185 | PF13458 | leucine/valine         |                |                             |
| Q93IU2 | SCO5113 | PF00496 | dipeptide/oligopeptide |                |                             |
| Q9F3I6 | SCO2795 | PF13416 | sugar                  |                |                             |
| Q9RJU7 | SCO0363 | PF01547 | sugar (maltose?)       |                |                             |

| Q9RDC3                                         | SCO2828    | PF00497   | amino acid<br>(glutamine/glutamate/aspartate?) |                                   |                                |
|------------------------------------------------|------------|-----------|------------------------------------------------|-----------------------------------|--------------------------------|
| Q9L178                                         | SCO7399    | PF01497   | iron-hydroxamate                               |                                   |                                |
| Q9L151                                         | SCO7408    | PF01547   | sugar                                          |                                   |                                |
| Q9EWQ0                                         | SCO7677    | PF00496   | dipeptide/oligopeptide                         |                                   |                                |
| Q9RK72                                         | SCO0538    | PF01547   | sugar                                          |                                   |                                |
| Q9F3K5                                         | SCO5260    | PF00497   | amino acid<br>(glutamine/glutamate/aspartate?) |                                   |                                |
| Q9RD69                                         | SCO0808    | PF13407   | rhamnose                                       |                                   |                                |
| Q9RKF3                                         | SCO3484    | PF01547   | sugar                                          |                                   |                                |
| O86572                                         | SCO5477    | PF00496   | dipeptide/oligopeptide                         |                                   |                                |
| Q93J94                                         | SCO7503    | PF01547   | sugar                                          |                                   |                                |
| O86832                                         | SCO5667    | PF13416   | spermidine/putrescine                          |                                   |                                |
| Q8CJY9                                         | SCO2658    | PF13416   | sugar                                          |                                   |                                |
| Q9L0B2                                         | SCO2434    | PF01547   | sugar                                          |                                   |                                |
| Q9X837                                         | SCO6070    | PF13407   | rhamnose                                       |                                   |                                |
| Q9K467                                         | SCO7218    | PF01497   | cobalamin                                      |                                   |                                |
| Q9RL38                                         | SCO0449    | PF13407   | rhamnose                                       |                                   |                                |
| Q9RIV4                                         | SCO0952    | PF01547   | sugar                                          |                                   |                                |
| Q9L2H8                                         | SCO2505    | PF01297   | zinc                                           |                                   |                                |
| Q9L270                                         | SCO1539    | PF01547   | sugar                                          |                                   |                                |
| Q9RKT5                                         | SCO6257    | PF13407   | ribose                                         |                                   |                                |
| Q9KZH3                                         | SCO6979    | PF13407   | rhamnose                                       |                                   |                                |
| Q9KYY3                                         | SCO7546    | PF09084   | phosphonates                                   |                                   |                                |
| Q9L0Z4                                         | SCO1465    | PF01547   | sugar                                          |                                   |                                |
|                                                |            |           |                                                |                                   |                                |
| <b><i>Sinorhizobium meliloti</i> 1021</b>      |            |           |                                                |                                   |                                |
| Number of ORFs in the proteome: 6169           |            |           |                                                |                                   |                                |
| Number of SBPs: 189 (3.06% of total)           |            |           |                                                |                                   |                                |
| Lifestyle Summary: BENEFICIAL PLANT ASSOCIATED |            |           |                                                |                                   |                                |
| SeqID                                          | Gene Locus | Pfam Code | Ligand prediction by TransportDB               | Experimentally identified ligands | References/pdb accession codes |
| Q926H8                                         | RB0402     | PF13416   | sugar                                          |                                   |                                |

|        |           |         |                                                |                                                                                          |                                       |
|--------|-----------|---------|------------------------------------------------|------------------------------------------------------------------------------------------|---------------------------------------|
| Q92KZ7 | R03301    | PF01547 | sugar                                          |                                                                                          |                                       |
| Q9Z3R5 | R00695    | PF01547 | sugar                                          | Sucrose, maltose and trehalose                                                           | doi: 10.1128/JB.181.14.4176-4184.1999 |
| Q9X4Y1 | RB1567    | PF00496 | dipeptide/oligopeptide                         | Melibiose and raffinose                                                                  | doi: 10.1128/JB.180.21.5739-5748.1998 |
| Q92T97 | SMc02589  | PF13416 | spermidine/putrescine                          |                                                                                          |                                       |
| Q931B1 | SMa0067   | PF13407 | ribose                                         |                                                                                          |                                       |
| Q92ZS4 | SMa0709   | PF01547 | sugar                                          |                                                                                          |                                       |
| Q92LQ8 | SMc03121  | PF13458 | urea                                           |                                                                                          |                                       |
| Q92XK3 | SMa2305   | PF01547 | sugar                                          |                                                                                          |                                       |
| Q926H2 | SM_b21221 | PF01547 | sugar                                          |                                                                                          |                                       |
| Q926G8 | SM_b21215 | PF00496 | dipeptide/oligopeptide                         |                                                                                          |                                       |
| Q92YR5 | SMa1462   | PF04069 | glycine betaine                                |                                                                                          |                                       |
| Q92PN7 | SMc00271  | PF03480 | C4-dicarboxylate                               |                                                                                          |                                       |
| Q92XC3 | SM_b20036 | PF03480 | C4-dicarboxylate                               |                                                                                          |                                       |
| Q92MV9 | SMc01966  | PF13416 | spermidine/putrescine                          |                                                                                          |                                       |
| Q92MD0 | SMc00676  | PF00497 | amino acid<br>(glutamine/glutamate/aspartate?) |                                                                                          |                                       |
| Q930R1 | SMa0252   | PF03480 | C4-dicarboxylate                               |                                                                                          |                                       |
| Q926E7 | SM_b20706 | PF00497 | amino acid<br>(glutamine/glutamate/aspartate?) |                                                                                          |                                       |
| Q926F1 | SM_b21432 | PF01497 | iron-hydroxamate                               |                                                                                          |                                       |
| Q926E5 | SM_b20720 | PF13407 | xylose                                         |                                                                                          |                                       |
| Q92YY1 | SMa1337   | PF01547 | sugar                                          |                                                                                          |                                       |
| Q926H7 | SM_b21016 | PF13407 | rhamnose                                       | Autoinducer-2 (AI-2), (2R,4S)-2-methyl-2,3,3,4-tetrahydroxytetrahydrofuran (AI-2 isomer) | doi: 10.1111/j.1365-2958.2008.06477.x |
| Q92MN0 | SMc02356  | PF13458 | leucine/valine                                 |                                                                                          |                                       |
| Q92P64 | SMc04259  | PF01547 | sugar                                          |                                                                                          |                                       |
| Q92MS8 | SMc02021  | PF13407 | ribose                                         |                                                                                          |                                       |
| Q92WP7 | SM_b20292 | PF16868 | phosphonate                                    |                                                                                          |                                       |
| Q92YT4 | SMa1427   | PF13407 | xylose                                         |                                                                                          |                                       |



|        |           |         |                                                |                           |                             |
|--------|-----------|---------|------------------------------------------------|---------------------------|-----------------------------|
| Q930Q0 | SMa0273   | PF13407 | xylose                                         |                           |                             |
| Q92VN0 | SM_b21090 | PF13416 | sugar                                          |                           |                             |
| Q92WQ5 | SM_b20284 | PF13416 | spermidine/putrescine                          |                           |                             |
| Q92YV8 | SMa1375   | PF00496 | dipeptide/oligopeptide                         |                           |                             |
| Q926F7 | SM_b20976 | PF00497 | amino acid<br>(glutamine/glutamate/aspartate?) |                           |                             |
| Q92WN0 | SM_b20316 | PF13407 | rhamnose                                       |                           |                             |
| Q92P72 | SMc04251  | PF03480 | C4-dicarboxylate                               |                           |                             |
| Q92WH9 | SM_b20374 | PF03480 | C4-dicarboxylate                               |                           |                             |
| Q926F9 | SM_b20931 | PF13407 | rhamnose                                       |                           |                             |
| Q92WP4 | SM_b20295 | PF03480 | C4-dicarboxylate                               |                           |                             |
| Q92M36 | SMc04037  | PF00496 | dipeptide/oligopeptide                         |                           |                             |
| Q926H0 | SM_b21273 | PF13416 | 2-aminoethylphosphonate                        |                           |                             |
| Q930S9 | SMa0218   | PF13407 | ribose                                         |                           |                             |
| Q92WB9 | SM_b20442 | PF03480 | C4-dicarboxylate                               |                           |                             |
| Q92MC6 | SMc00672  | PF04069 | glycine betaine                                |                           |                             |
| Q930W1 | SMa0157   | PF03480 | C4-dicarboxylate                               |                           |                             |
| Q92XT1 | SMa2129   | PF02608 | sugar                                          |                           |                             |
| Q92TP4 | SM_b20771 | PF03401 | tricarboxylate                                 |                           |                             |
| Q92V05 | SM_b21353 | PF03480 | C4-dicarboxylate                               |                           |                             |
| Q92PP3 | SMc00265  | PF03480 | C4-dicarboxylate                               |                           |                             |
| Q92WY4 | SM_b20178 | PF13458 | leucine/valine                                 |                           |                             |
| Q92P42 | SMc04293  | PF00496 | dipeptide/oligopeptide                         |                           |                             |
| Q92S11 | SMc02324  | PF13407 | rhamnose                                       |                           |                             |
| Q92N37 | SMc02737  | PF04069 | choline                                        | Choline and acetylcholine | doi: 10.1074/jbc.M806021200 |
| Q926G0 | SM_b21604 | PF13416 | sugar                                          |                           |                             |
| Q92WY7 | SM_b20175 | PF00497 | amino acid<br>(glutamine/glutamate/aspartate?) |                           |                             |
| Q92T30 | SMc02832  | PF00496 | oligopeptide                                   |                           |                             |
| Q92W79 | SM_b20484 | PF13407 | rhamnose                                       |                           |                             |
| Q92LE5 | SMc03269  | PF00496 | dipeptide/oligopeptide                         |                           |                             |
| Q92L85 | SMc03813  | PF13407 | rhamnose                                       |                           |                             |

|        |           |         |                                                |  |  |
|--------|-----------|---------|------------------------------------------------|--|--|
| Q926F4 | SM_b20895 | PF13407 | xylose                                         |  |  |
| Q926G7 | SM_b21345 | PF13407 | ribose                                         |  |  |
| Q926B4 | SM_b21438 | PF03480 | C4-dicarboxylate                               |  |  |
| Q930T8 | SMA0203   | PF13407 | rhamnose                                       |  |  |
| Q92XA6 | SM_b20056 | PF01497 | cobalamin                                      |  |  |
| Q92Y64 | SMA1860   | PF00496 | dipeptide/oligopeptide                         |  |  |
| Q92W87 | SM_b20476 | PF00496 | dipeptide/oligopeptide                         |  |  |
| Q92PJ6 | SMc00513  | PF13458 | leucine/valine                                 |  |  |
| Q92N15 | SMc01512  | PF01497 | iron-hydroxamate                               |  |  |
| Q92MS4 | SMc02025  | PF00496 | dipeptide/oligopeptide                         |  |  |
| Q92WS6 | SM_b20263 | PF00497 | amino acid<br>(glutamine/glutamate/aspartate?) |  |  |
| Q926F8 | SM_b20971 | PF01547 | sugar                                          |  |  |
| Q926G1 | SM_b21595 | PF01547 | sugar                                          |  |  |
| Q92LI8 | SMc02471  | PF13416 | sugar                                          |  |  |
| Q92P75 | SMc04245  | PF01297 | zinc ion                                       |  |  |
| Q92W55 | SM_b20508 | PF00532 | ribose                                         |  |  |
| Q92MP7 | SMc02338  | PF13407 | xylose                                         |  |  |
| Q92MU8 | SMc01977  | PF13416 | sugar                                          |  |  |
| Q92NV4 | SMc04341  | PF04069 | glycine betaine                                |  |  |
| Q7ANS2 | SM_b20325 | PF01547 | sugar                                          |  |  |
| Q926H6 | SM_b21037 | PF00496 | dipeptide/oligopeptide                         |  |  |
| Q926I0 | SM_b21652 | PF13416 | sugar                                          |  |  |
| Q926H1 | SM_b21261 | PF00496 | dipeptide/oligopeptide                         |  |  |
| Q92LX5 | SMc03157  | PF03180 | methionine                                     |  |  |
| Q931A3 | SMA0082   | PF00497 | amino acid<br>(glutamine/glutamate/aspartate?) |  |  |
| Q92N26 | SMc01525  | PF00496 | dipeptide/oligopeptide                         |  |  |
| Q92N02 | SMc01496  | PF01547 | sugar                                          |  |  |
| Q92NE7 | SMc01647  | PF00496 | dipeptide/oligopeptide                         |  |  |
| Q92W59 | SM_b20504 | PF13407 | rhamnose                                       |  |  |
| Q92RK9 | SMc00991  | PF13416 | spermidine/putrescine                          |  |  |
| Q92MM2 | SMc02415  | PF00496 | dipeptide/oligopeptide                         |  |  |

|        |           |         |                                                |  |  |
|--------|-----------|---------|------------------------------------------------|--|--|
| Q92LR1 | SMc03124  | PF00496 | dipeptide/oligopeptide                         |  |  |
| Q926H5 | SM_b21097 | PF00497 | amino acid<br>(glutamine/glutamate/aspartate?) |  |  |
| Q92YH7 | SMA1651   | PF00496 | nickel                                         |  |  |
| Q92PY3 | SMc01205  | PF00497 | amino acid<br>(glutamine/glutamate/aspartate?) |  |  |
| Q92S63 | SMc02259  | PF00497 | amino acid<br>(glutamine/glutamate/aspartate?) |  |  |
| Q926E6 | SM_b20712 | PF13407 | xylose                                         |  |  |
| Q92XV7 | SMA2075   | PF00496 | dipeptide/oligopeptide                         |  |  |
| Q92WK4 | SM_b20349 | PF13407 | ribose                                         |  |  |
| Q926F6 | SM_b20981 | PF03480 | C4-dicarboxylate                               |  |  |
| Q926E1 | SM_b20620 | PF13407 | rhamnose                                       |  |  |
| Q92SZ7 | SMc02873  | PF13416 | sugar                                          |  |  |
| Q7D4K4 | SMA1183   | PF05048 | Not annotated in TransportDB                   |  |  |
| Q926F3 | SM_b20902 | PF13407 | xylose                                         |  |  |
| Q926G6 | SM_b21377 | PF13407 | ribose                                         |  |  |
| Q926H4 | SM_b21103 | PF01547 | sugar                                          |  |  |
| Q926E0 | SM_b20634 | PF13416 | sugar                                          |  |  |
| Q92WV7 | SM_b20231 | PF13416 | sugar                                          |  |  |
| Q930Z3 | SMA0104   | PF00496 | dipeptide/oligopeptide                         |  |  |
| Q92X54 | SM_b20108 | PF00496 | dipeptide/oligopeptide                         |  |  |
| Q92RX4 | SMc00770  | PF13416 | spermidine/putrescine                          |  |  |
| Q92PT7 | SMc00951  | PF00496 | oligopeptide                                   |  |  |
| Q92PA9 | SMc00140  | PF00497 | amino acid<br>(glutamine/glutamate/aspartate?) |  |  |
| Q92MM0 | SMc02417  | PF00496 | dipeptide/oligopeptide                         |  |  |
| Q92PR4 | SMc00242  | PF02608 | sugar                                          |  |  |
| Q92L69 | SMc03830  | PF04392 | Unclassified                                   |  |  |
| Q92R76 | SMc02378  | PF04069 | glycine betaine                                |  |  |
| Q92TR9 | SM_b20724 | PF03401 | tricarboxylate                                 |  |  |
| Q926F5 | SM_b20856 | PF13407 | xylose                                         |  |  |
| Q926C5 | SMc01946  | PF13458 | leucine/valine                                 |  |  |

|        |           |         |                                                |                            |                                |
|--------|-----------|---------|------------------------------------------------|----------------------------|--------------------------------|
| Q930N2 | SMa0302   | PF00496 | dipeptide/oligopeptide                         |                            |                                |
| Q92ZU1 | SMa0677   | PF00497 | amino acid<br>(glutamine/glutamate/aspartate?) |                            |                                |
| Q92SC8 | SMc02171  | PF13407 | ribose                                         |                            |                                |
| Q926F0 | SM_b21461 | PF13416 | sugar                                          |                            |                                |
| Q92RW0 | SMc00786  | PF00496 | dipeptide/oligopeptide                         |                            |                                |
| Q92YD3 | SMa1729   | PF04069 | glycine betaine                                |                            |                                |
| Q926G9 | SM_b21144 | PF04069 | glycine betaine                                |                            |                                |
| Q92LR8 | SMc03131  | PF00497 | amino acid<br>(glutamine/glutamate/aspartate?) |                            |                                |
| Q92V92 | SM_b21151 | PF13416 | sugar                                          |                            |                                |
| Q7ANR0 | SM_b21196 | PF00496 | oligopeptide                                   |                            |                                |
| Q92YS7 | SMa1438   | PF00496 | dipeptide/oligopeptide                         |                            |                                |
| Q92XZ2 | SMa2000   | PF13407 | xylose                                         |                            |                                |
| Q92XQ7 | SMa2199   | PF00497 | amino acid<br>(glutamine/glutamate/aspartate?) |                            |                                |
| Q92WY1 | SM_b20181 | PF09084 | nitrate/sulfonate/taurine                      |                            |                                |
| Q92WC8 | SM_b20428 | PF00497 | amino acid<br>(glutamine/glutamate/aspartate?) | Ectoine and hydroxyectoine | doi: 10.1016/j.jmb.2007.09.071 |
| Q92X35 | SM_b20127 | PF02608 | sugar                                          |                            |                                |
| Q92NE3 | SMc01652  | PF13416 | spermidine/putrescine                          |                            |                                |
| Q92X90 | SM_b20072 | PF13407 | xylose                                         |                            |                                |
| Q92NF1 | SMc01642  | PF00496 | dipeptide/oligopeptide                         |                            |                                |
| Q92ZM2 | SMa0799   | PF13416 | spermidine/putrescine                          |                            |                                |
| Q92L16 | SMc03891  | PF00497 | amino acid<br>(glutamine/glutamate/aspartate?) |                            |                                |
| Q92S93 | SMc02219  | PF00497 | amino acid<br>(glutamine/glutamate/aspartate?) |                            |                                |
| Q92LL5 | SMc02509  | PF01297 | manganese/zinc ion                             |                            |                                |
| Q926G5 | SM_b21526 | PF09084 | glycine betaine                                |                            |                                |
| Q930D8 | SMa0495   | PF00497 | amino acid<br>(glutamine/glutamate/aspartate?) |                            |                                |
| Q92T63 | SMc04135  | PF13416 | sugar                                          |                            |                                |

|        |           |         |                                                |  |  |
|--------|-----------|---------|------------------------------------------------|--|--|
| Q926F2 | SM_b21421 | PF13407 | xylose                                         |  |  |
| Q92YB5 | SMa1755   | PF13416 | spermidine/putrescine                          |  |  |
| Q930D2 | SMa0506   | PF00497 | amino acid<br>(glutamine/glutamate/aspartate?) |  |  |
| Q926E9 | SM_b20660 | PF13416 | sugar                                          |  |  |
| Q92TN0 | SM_b20568 | PF13458 | urea                                           |  |  |
| Q92X18 | SM_b20144 | PF00496 | dipeptide/oligopeptide                         |  |  |
| Q926G3 | SM_b21572 | PF04069 | glycine betaine                                |  |  |
| Q92XH5 | SMa2361   | PF02608 | sugar                                          |  |  |
| Q92WH0 | SM_b20383 | PF13416 | spermidine/putrescine                          |  |  |
| Q92K04 | SMc01827  | PF09084 | nitrate/sulfonate/taurine                      |  |  |
| Q92ZH2 | SMa0950   | PF13416 | spermidine/putrescine                          |  |  |
| Q92ND7 | SMc01659  | PF01497 | iron-hydroxamate                               |  |  |
| Q926G2 | SM_b21587 | PF13407 | ribose                                         |  |  |
| Q92YW6 | SMa1364   | PF13416 | sugar                                          |  |  |
| Q926E4 | SM_b20723 | PF13416 | 2-aminoethylphosphonate                        |  |  |
| Q92NG1 | SMc01632  | PF13416 | spermidine/putrescine                          |  |  |
| Q92ZZ6 | SMa0576   | PF13458 | leucine/valine                                 |  |  |
| Q92YC2 | SMa1746   | PF01497 | iron-hydroxamate                               |  |  |
| Q92MR7 | SMc02033  | PF13407 | xylose                                         |  |  |
| Q926E8 | SM_b20671 | PF13407 | xylose                                         |  |  |
| Q92RF4 | SMc00078  | PF13458 | leucine/valine                                 |  |  |
| Q92P29 | SMc04311  | PF04069 | glycine betaine                                |  |  |
| Q92TD7 | SMc02774  | PF13407 | rhamnose                                       |  |  |
| Q92Q71 | SMc02118  | PF00497 | amino acid<br>(glutamine/glutamate/aspartate?) |  |  |
| Q930F5 | SMa0466   | PF00496 | dipeptide/oligopeptide                         |  |  |
| Q92W28 | SM_b20538 | PF13416 | sugar                                          |  |  |
| Q926H3 | SM_b21135 | PF00497 | amino acid<br>(glutamine/glutamate/aspartate?) |  |  |
| Q92L38 | SMc03864  | PF00497 | amino acid<br>(glutamine/glutamate/aspartate?) |  |  |
| Q92SA4 | SMc02146  | PF12849 | phosphate                                      |  |  |

| Q92MP1                                               | SMc02344   | PF09084   | phosphonates                                   |                                   |                                |
|------------------------------------------------------|------------|-----------|------------------------------------------------|-----------------------------------|--------------------------------|
| Q930I7                                               | SMa0392    | PF13416   | spermidine/putrescine                          |                                   |                                |
| Q92XE1                                               | SM_b20018  | PF13407   | xylose                                         |                                   |                                |
| Q926D6                                               | SMc02884   | PF02608   | sugar                                          |                                   |                                |
| Q92LM0                                               | SMc02514   | PF01547   | sugar                                          |                                   |                                |
| Q92WE4                                               | SM_b20410  | PF04069   | choline                                        |                                   |                                |
| Q92YV6                                               | SMa1379    | PF00496   | dipeptide/oligopeptide                         |                                   |                                |
| Q926E3                                               | SM_b20570  | PF09084   | phosphonates                                   |                                   |                                |
| Q92Y30                                               | SMa1927    | PF03401   | tricarboxylate                                 |                                   |                                |
| Q92XV1                                               | SMa2087    | PF09084   | phosphonates                                   |                                   |                                |
| Q92XU8                                               | SMa2093    | PF09084   | nitrate/sulfonate/taurine                      |                                   |                                |
| Q92XD4                                               | SM_b20025  | PF03401   | tricarboxylate                                 |                                   |                                |
| Q92NG5                                               | SMc01628   | PF01547   | sugar                                          |                                   |                                |
| Q92VT4                                               | SM_b21043  | PF03401   | tricarboxylate                                 |                                   |                                |
| Q92WM6                                               | SM_b20320  | PF03480   | C4-dicarboxylate                               |                                   |                                |
| Q92PI5                                               | SMc00499   | PF03401   | tricarboxylate                                 |                                   |                                |
| Q92NW2                                               | SMc04289   | PF03480   | C4-dicarboxylate                               |                                   |                                |
|                                                      |            |           |                                                |                                   |                                |
| <b><i>Clostridium botulinum</i> A str. ATCC 3502</b> |            |           |                                                |                                   |                                |
| Number of ORFs in the proteome: 3590                 |            |           |                                                |                                   |                                |
| Number of SBPs: 35 (0.97% of total)                  |            |           |                                                |                                   |                                |
| Lifestyle Summary: HUMAN/ANIMAL PATHOGEN             |            |           |                                                |                                   |                                |
| SeqID                                                | Gene Locus | Pfam Code | Ligand prediction by TransportDB               | Experimentally identified ligands | References/pdb accession codes |
| A5HYZ7                                               | CBO0453    | PF13458   | leucine/valine                                 |                                   |                                |
| A5HY04                                               | CBO0107    | PF13416   | sugar                                          |                                   |                                |
| A5I2E3                                               | CBO1675    | PF00496   | dipeptide/oligopeptide                         |                                   |                                |
| A5I0S8                                               | CBO1086    | PF03180   | methionine                                     |                                   |                                |
| A5I1P3                                               | CBO1411    | PF00497   | amino acid<br>(glutamine/glutamate/aspartate?) |                                   |                                |
| A5I102                                               | CBO1162    | PF04392   | Unclassified                                   |                                   |                                |
| A5HYJ4                                               | CBO0301    | PF01497   | iron-hydroxamate                               |                                   |                                |

|        |         |         |                                                |  |  |
|--------|---------|---------|------------------------------------------------|--|--|
| A513E2 | CBO2018 | PF00497 | amino acid<br>(glutamine/glutamate/aspartate?) |  |  |
| A511H2 | CBO1337 | PF01497 | iron-hydroxamate                               |  |  |
| A5HYB2 | CBO0219 | PF02608 | sugar                                          |  |  |
| A51120 | CBO1181 | PF00497 | amino acid<br>(glutamine/glutamate/aspartate?) |  |  |
| A510U9 | CBO1107 | PF13416 | spermidine/putrescine                          |  |  |
| A5HYS8 | CBO0384 | PF12849 | phosphate                                      |  |  |
| A5HYZ0 | CBO0446 | PF00497 | amino acid<br>(glutamine/glutamate/aspartate?) |  |  |
| A51371 | CBO1946 | PF12849 | tungsten                                       |  |  |
| A5HYJ9 | CBO0306 | PF01497 | iron-hydroxamate                               |  |  |
| A5HZL3 | CBO0670 | PF04392 | trimethylamine N-oxide                         |  |  |
| A5HZM9 | CBO0686 | PF01497 | iron-hydroxamate                               |  |  |
| A51165 | CBO1227 | PF00496 | dipeptide/oligopeptide                         |  |  |
| A516Z1 | CBO3264 | PF00496 | oligopeptide                                   |  |  |
| A510S9 | CBO1087 | PF03180 | methionine                                     |  |  |
| A5HZW3 | CBO0770 | PF01547 | sugar                                          |  |  |
| A516N0 | CBO3150 | PF00496 | oligopeptide                                   |  |  |
| A511I9 | CBO1355 | PF00496 | dipeptide/oligopeptide                         |  |  |
| A511X9 | CBO1501 | PF03180 | methionine                                     |  |  |
| A514V6 | CBO2525 | PF12849 | phosphate                                      |  |  |
| A510G6 | CBO0974 | PF01497 | cobalamin                                      |  |  |
| A511J7 | CBO1363 | PF01297 | manganese/zinc ion                             |  |  |
| A51743 | CBO3318 | PF01297 | manganese/zinc ion                             |  |  |
| A511Z5 | CBO1518 | PF13416 | sugar                                          |  |  |
| A515Y1 | CBO2897 | PF01497 | iron-hydroxamate                               |  |  |
| A5HYK3 | CBO0310 | PF01497 | iron-hydroxamate                               |  |  |
| A510P0 | CBO1047 | PF01497 | iron-hydroxamate                               |  |  |
| A510Z2 | CBO1151 | PF00497 | amino acid<br>(glutamine/glutamate/aspartate?) |  |  |
| A516V0 | CBO3221 | PF01547 | sugar                                          |  |  |
|        |         |         |                                                |  |  |

| <b><i>Lactococcus lactis</i> subsp. <i>lactis</i> II1403</b> |                   |                  |                                                |                                          |                                       |
|--------------------------------------------------------------|-------------------|------------------|------------------------------------------------|------------------------------------------|---------------------------------------|
| Number of ORFs in the proteome: 2225                         |                   |                  |                                                |                                          |                                       |
| Number of SBPs: 20 (0.90% of total)                          |                   |                  |                                                |                                          |                                       |
| Lifestyle Summary: FOOD                                      |                   |                  |                                                |                                          |                                       |
| <b>SeqID</b>                                                 | <b>Gene Locus</b> | <b>Pfam Code</b> | <b>Ligand prediction by TransportDB</b>        | <b>Experimentally identified ligands</b> | <b>References/pdb accession codes</b> |
| Q9CFZ5                                                       | LL1316            | PF01297          | zinc                                           |                                          |                                       |
| Q9CEK0                                                       | LL1837            | PF00496          | dipeptide/oligopeptide                         |                                          |                                       |
| Q9CIN8                                                       | L117444           | PF03180          | methionine                                     |                                          |                                       |
| Q9CI27                                                       | L124415           | PF00496          | oligopeptide                                   |                                          |                                       |
| Q9CIN5                                                       | L120334           | PF03180          | methionine                                     |                                          |                                       |
| Q9CEZ8                                                       | L128695           | PF13416          | sugar (maltose?)                               |                                          |                                       |
| Q9CFM9                                                       | L61620            | PF02608          | sugar                                          |                                          |                                       |
| Q9CIN6                                                       | L119452           | PF03180          | methionine                                     |                                          |                                       |
| Q9CDU6                                                       | L167426           | PF01297          | manganese/zinc ion                             |                                          |                                       |
| Q9CEW4                                                       | L158188           | PF12849          | phosphate                                      |                                          |                                       |
| Q9CIN7                                                       | L118475           | PF03180          | methionine                                     |                                          |                                       |
| Q9CIL3                                                       | L143312           | PF00496          | oligopeptide                                   |                                          |                                       |
| Q9CF46                                                       | L82310            | PF13407          | xylose                                         |                                          |                                       |
| Q9CI05                                                       | L158343           | PF00497          | amino acid<br>(glutamine/glutamate/aspartate?) |                                          |                                       |
| Q9CIM6                                                       | L129403           | PF01497          | iron-hydroxamate                               |                                          |                                       |
| Q9CH05                                                       | L162009           | PF00497          | amino acid<br>(glutamine/glutamate/aspartate?) |                                          |                                       |
| Q9CDZ9                                                       | L121253           | PF00497          | amino acid<br>(glutamine/glutamate/aspartate?) |                                          |                                       |
| Q9CEW3                                                       | L159386           | PF12849          | phosphate                                      |                                          |                                       |
| Q9CIL2                                                       | L145267           | PF00496          | oligopeptide                                   |                                          |                                       |
| Q9CGD1                                                       | L178329           | PF13416          | spermidine/putrescine                          |                                          |                                       |
|                                                              |                   |                  |                                                |                                          |                                       |
| <b><i>Comamonas testosteroni</i> CNB-2</b>                   |                   |                  |                                                |                                          |                                       |
| Number of ORFs in the proteome: 4780                         |                   |                  |                                                |                                          |                                       |
| Number of SBPs: 177 (3.70% of total)                         |                   |                  |                                                |                                          |                                       |



| Lifestyle Summary: ACTIVE SLUDGE |             |           |                                                |                                   |                                |
|----------------------------------|-------------|-----------|------------------------------------------------|-----------------------------------|--------------------------------|
| SeqID                            | Gene Locus  | Pfam Code | Ligand prediction by TransportDB               | Experimentally identified ligands | References/pdb accession codes |
| DOI1V1                           | CtCNB1_2193 | PF03401   | tricarboxylate                                 |                                   |                                |
| DOJ7K0                           | CtCNB1_4186 | PF03480   | C4-dicarboxylate                               |                                   |                                |
| A0A454XZJ5                       | CtCNB1_4331 | PF03401   | tricarboxylate                                 |                                   |                                |
| DOJ432                           | CtCNB1_1479 | PF03401   | tricarboxylate                                 |                                   |                                |
| DOJ6W2                           | CtCNB1_1923 | PF03401   | tricarboxylate                                 |                                   |                                |
| DOJ453                           | CtCNB1_3521 | PF03480   | C4-dicarboxylate                               |                                   |                                |
| DOJ4P2                           | CtCNB1_1554 | PF03180   | methionine                                     |                                   |                                |
| DOIUTO                           | CtCNB1_4341 | PF09084   | nitrate/sulfonate/taurine                      |                                   |                                |
| DOIWG9                           | CtCNB1_0241 | PF03401   | tricarboxylate                                 |                                   |                                |
| DOJ634                           | CtCNB1_1779 | PF03401   | tricarboxylate                                 |                                   |                                |
| DOJ6J2                           | CtCNB1_3963 | PF03401   | tricarboxylate                                 |                                   |                                |
| DOJ776                           | CtCNB1_4062 | PF03401   | tricarboxylate                                 |                                   |                                |
| DOJ8C2                           | CtCNB1_4280 | PF03401   | tricarboxylate                                 |                                   |                                |
| DOJ6F2                           | CtCNB1_3923 | PF03401   | tricarboxylate                                 |                                   |                                |
| DOJ605                           | CtCNB1_3911 | PF03401   | tricarboxylate                                 |                                   |                                |
| DOJ021                           | CtCNB1_0742 | PF03401   | tricarboxylate                                 |                                   |                                |
| DOJ1H4                           | CtCNB1_3117 | PF03401   | tricarboxylate                                 |                                   |                                |
| DOIWP8                           | CtCNB1_2311 | PF03401   | tricarboxylate                                 |                                   |                                |
| DOJ1E5                           | CtCNB1_3088 | PF03401   | tricarboxylate                                 |                                   |                                |
| DOJ4E7                           | CtCNB1_3615 | PF03401   | tricarboxylate                                 |                                   |                                |
| DOI279                           | CtCNB1_0583 | PF03401   | tricarboxylate                                 |                                   |                                |
| DOJ2X2                           | CtCNB1_3349 | PF03401   | tricarboxylate                                 |                                   |                                |
| DOJ5E6                           | CtCNB1_1673 | PF03401   | tricarboxylate                                 |                                   |                                |
| DOJ3N5                           | CtCNB1_3483 | PF13458   | urea                                           |                                   |                                |
| DOJ0F8                           | CtCNB1_2883 | PF03401   | tricarboxylate                                 |                                   |                                |
| DOI1D4                           | CtCNB1_4700 | PF03401   | tricarboxylate                                 |                                   |                                |
| DOI193                           | CtCNB1_4659 | PF03401   | tricarboxylate                                 |                                   |                                |
| A0A454XMV                        | CtCNB1_0577 | PF00497   | amino acid<br>(glutamine/glutamate/aspartate?) |                                   |                                |
| DOJ7M0                           | CtCNB1_0014 | PF03401   | tricarboxylate                                 |                                   |                                |

|            |             |         |                                                |  |  |
|------------|-------------|---------|------------------------------------------------|--|--|
| A0A454XSEC | CtCNB1_0781 | PF03401 | tricarboxylate                                 |  |  |
| DOJ614     | CtCNB1_3920 | PF03401 | tricarboxylate                                 |  |  |
| DOJ3U6     | CtCNB1_1393 | PF04069 | glycine betaine                                |  |  |
| DOIXM6     | CtCNB1_0375 | PF03401 | tricarboxylate                                 |  |  |
| DOJ1V0     | CtCNB1_1100 | PF03401 | tricarboxylate                                 |  |  |
| DOIUT5     | CtCNB1_4346 | PF03401 | tricarboxylate                                 |  |  |
| DOIX87     | CtCNB1_4653 | PF03401 | tricarboxylate                                 |  |  |
| DOJ4T5     | CtCNB1_1597 | PF03401 | tricarboxylate                                 |  |  |
| DOJOG2     | CtCNB1_2887 | PF03401 | tricarboxylate                                 |  |  |
| DOJ0Z6     | CtCNB1_0930 | PF03401 | tricarboxylate                                 |  |  |
| DOJ735     | CtCNB1_1996 | PF00497 | amino acid<br>(glutamine/glutamate/aspartate?) |  |  |
| A0A454XUP  | CtCNB1_4579 | PF09084 | phosphonates                                   |  |  |
| DOIXR6     | CtCNB1_0415 | PF03401 | tricarboxylate                                 |  |  |
| DOJ445     | CtCNB1_1492 | PF03401 | tricarboxylate                                 |  |  |
| DOJ705     | CtCNB1_1966 | PF03401 | tricarboxylate                                 |  |  |
| DOIZS4     | CtCNB1_2781 | PF03401 | tricarboxylate                                 |  |  |
| DOJ454     | CtCNB1_3522 | PF03480 | C4-dicarboxylate                               |  |  |
| DOJ063     | CtCNB1_0784 | PF03401 | tricarboxylate                                 |  |  |
| DOIWH1     | CtCNB1_0243 | PF03401 | tricarboxylate                                 |  |  |
| A0A454XI80 | CtCNB1_4364 | PF03401 | tricarboxylate                                 |  |  |
| DOJ7F0     | CtCNB1_4136 | PF03401 | tricarboxylate                                 |  |  |
| DOJ3M0     | CtCNB1_3468 | PF03401 | tricarboxylate                                 |  |  |
| A0A454XQX  | CtCNB1_4766 | PF03401 | tricarboxylate                                 |  |  |
| DOJ889     | CtCNB1_4247 | PF03401 | tricarboxylate                                 |  |  |
| DOJ310     | CtCNB1_1244 | PF03401 | tricarboxylate                                 |  |  |
| DOIYT8     | CtCNB1_2581 | PF03401 | tricarboxylate                                 |  |  |
| A0A454XNV  | CtCNB1_4594 | PF03480 | C4-dicarboxylate                               |  |  |
| DOJ4R2     | CtCNB1_1574 | PF01497 | iron-hydroxamate                               |  |  |
| DOIVF9     | CtCNB1_0149 | PF09084 | phosphonates                                   |  |  |
| DOJ4Z3     | CtCNB1_3680 | PF02608 | sugar                                          |  |  |
| DOJ2H4     | CtCNB1_1194 | PF03401 | tricarboxylate                                 |  |  |
| DOJ2J9     | CtCNB1_1219 | PF13458 | leucine/valine                                 |  |  |

|            |             |         |                                                |  |  |
|------------|-------------|---------|------------------------------------------------|--|--|
| DOIYE0     | CtCNB1_4791 | PF13458 | urea                                           |  |  |
| DOJ3J7     | CtCNB1_3445 | PF13458 | urea                                           |  |  |
| DOIZH8     | CtCNB1_0682 | PF03401 | tricarboxylate                                 |  |  |
| DOJ1D2     | CtCNB1_3075 | PF09084 | glycine betaine                                |  |  |
| DOJ6A0     | CtCNB1_1845 | PF01497 | iron-hydroxamate                               |  |  |
| DOJ0Z9     | CtCNB1_0933 | PF13416 | sugar                                          |  |  |
| DOIUU1     | CtCNB1_4352 | PF13458 | leucine/valine                                 |  |  |
| A0A454XZH5 | CtCNB1_3679 | PF02608 | sugar                                          |  |  |
| DOIUS8     | CtCNB1_4339 | PF09084 | nitrate/sulfonate/taurine                      |  |  |
| DOJ0J2     | CtCNB1_2917 | PF00497 | amino acid<br>(glutamine/glutamate/aspartate?) |  |  |
| DOIV66     | CtCNB1_0056 | PF02608 | sugar                                          |  |  |
| DOJ1F4     | CtCNB1_3097 | PF03480 | C4-dicarboxylate                               |  |  |
| DOIUR7     | CtCNB1_4328 | PF13458 | leucine/valine                                 |  |  |
| DOJ3U5     | CtCNB1_1392 | PF04069 | glycine betaine                                |  |  |
| DOJ4P3     | CtCNB1_1555 | PF03180 | methionine                                     |  |  |
| DOJ7T3     | CtCNB1_2067 | PF09084 | phosphonates                                   |  |  |
| DOIYQ7     | CtCNB1_0547 | PF09084 | nitrate/sulfonate/taurine                      |  |  |
| DOIZ93     | CtCNB1_0597 | PF01497 | iron-hydroxamate                               |  |  |
| DOJ819     | CtCNB1_2153 | PF03401 | tricarboxylate                                 |  |  |
| DOJ658     | CtCNB1_1803 | PF03401 | tricarboxylate                                 |  |  |
| A0A454Y413 | CtCNB1_1952 | PF03180 | methionine                                     |  |  |
| DOIW19     | CtCNB1_4509 | PF03401 | tricarboxylate                                 |  |  |
| A0A454Y7F0 | CtCNB1_0215 | PF13458 | urea                                           |  |  |
| DOJ0N6     | CtCNB1_2961 | PF13458 | urea                                           |  |  |
| DOIYU1     | CtCNB1_2584 | PF00497 | Unclassified                                   |  |  |
| DOIUZ5     | CtCNB1_4406 | PF13458 | urea                                           |  |  |
| DOJ641     | CtCNB1_1786 | PF00496 | oligopeptide                                   |  |  |
| DOJ3I8     | CtCNB1_3436 | PF13458 | urea                                           |  |  |
| DOJ778     | CtCNB1_4064 | PF03401 | tricarboxylate                                 |  |  |
| A0A454XWN  | CtCNB1_2054 | PF03180 | methionine                                     |  |  |
| DOIWA6     | CtCNB1_0096 | PF13458 | urea                                           |  |  |
| DOJ1U4     | CtCNB1_1094 | PF03401 | tricarboxylate                                 |  |  |

|            |             |         |                                                |  |  |
|------------|-------------|---------|------------------------------------------------|--|--|
| D0J827     | CtCNB1_2161 | PF03401 | tricarboxylate                                 |  |  |
| D0J3H0     | CtCNB1_3418 | PF03401 | tricarboxylate                                 |  |  |
| D0J661     | CtCNB1_1806 | PF03401 | tricarboxylate                                 |  |  |
| D0J6N8     | CtCNB1_4009 | PF03401 | tricarboxylate                                 |  |  |
| D0J3U4     | CtCNB1_1391 | PF04069 | glycine betaine                                |  |  |
| D0IYD4     | CtCNB1_4785 | PF03401 | tricarboxylate                                 |  |  |
| A0A454XQR  | CtCNB1_4182 | PF00497 | amino acid<br>(glutamine/glutamate/aspartate?) |  |  |
| D0J569     | CtCNB1_3756 | PF03401 | tricarboxylate                                 |  |  |
| A0A454XRT4 | CtCNB1_3800 | PF09084 | glycine betaine                                |  |  |
| D0J770     | CtCNB1_2031 | PF03401 | tricarboxylate                                 |  |  |
| D0J565     | CtCNB1_3752 | PF03401 | tricarboxylate                                 |  |  |
| D0IX48     | CtCNB1_4614 | PF03401 | tricarboxylate                                 |  |  |
| D0IX40     | CtCNB1_4606 | PF03401 | tricarboxylate                                 |  |  |
| A0A454XV58 | CtCNB1_1485 | PF09084 | amino acid<br>(glutamine/glutamate/aspartate?) |  |  |
| D0IWF3     | CtCNB1_0225 | PF03401 | tricarboxylate                                 |  |  |
| D0IWG6     | CtCNB1_0238 | PF03401 | tricarboxylate                                 |  |  |
| D0J085     | CtCNB1_0806 | PF00496 | dipeptide/oligopeptide                         |  |  |
| D0J6T7     | CtCNB1_1898 | PF03401 | tricarboxylate                                 |  |  |
| D0J1E1     | CtCNB1_3084 | PF03401 | tricarboxylate                                 |  |  |
| D0J2Y5     | CtCNB1_3362 | PF03401 | tricarboxylate                                 |  |  |
| D0J5L2     | CtCNB1_1739 | PF13458 | leucine/valine                                 |  |  |
| D0J2Y4     | CtCNB1_3361 | PF03401 | tricarboxylate                                 |  |  |
| D0J2C7     | CtCNB1_1147 | PF13458 | urea                                           |  |  |
| D0J1T3     | CtCNB1_1083 | PF13458 | urea                                           |  |  |
| D0J6E1     | CtCNB1_1886 | PF01497 | cobalamin                                      |  |  |
| D0J3N1     | CtCNB1_3479 | PF13458 | urea                                           |  |  |
| A0A454XQT  | CtCNB1_2167 | PF13458 | leucine/valine                                 |  |  |
| D0J301     | CtCNB1_3378 | PF03401 | tricarboxylate                                 |  |  |
| D0IZU0     | CtCNB1_2797 | PF03401 | tricarboxylate                                 |  |  |
| D0J327     | CtCNB1_1261 | PF03401 | tricarboxylate                                 |  |  |
| D0IW15     | CtCNB1_4505 | PF03401 | tricarboxylate                                 |  |  |

|            |             |         |                                                |  |  |
|------------|-------------|---------|------------------------------------------------|--|--|
| D0IXC9     | CtCNB1_4695 | PF03401 | tricarboxylate                                 |  |  |
| D0IYS2     | CtCNB1_0562 | PF03480 | C4-dicarboxylate                               |  |  |
| D0J3L3     | CtCNB1_3461 | PF02608 | sugar                                          |  |  |
| D0J306     | CtCNB1_3383 | PF03401 | tricarboxylate                                 |  |  |
| D0J1Y8     | CtCNB1_3145 | PF03401 | tricarboxylate                                 |  |  |
| D0J2J3     | CtCNB1_1213 | PF03401 | tricarboxylate                                 |  |  |
| D0J8D9     | CtCNB1_4297 | PF03401 | tricarboxylate                                 |  |  |
| D0J570     | CtCNB1_3757 | PF03401 | tricarboxylate                                 |  |  |
| D0IWE7     | CtCNB1_0219 | PF03401 | tricarboxylate                                 |  |  |
| D0J7L1     | CtCNB1_0005 | PF03401 | tricarboxylate                                 |  |  |
| D0IYN5     | CtCNB1_0525 | PF03480 | C4-dicarboxylate                               |  |  |
| A0A454Y4K3 | CtCNB1_3520 | PF03480 | C4-dicarboxylate                               |  |  |
| D0J8B1     | CtCNB1_4269 | PF03401 | tricarboxylate                                 |  |  |
| D0J1D1     | CtCNB1_3074 | PF09084 | nitrate/sulfonate/taurine                      |  |  |
| D0J4F2     | CtCNB1_3620 | PF13458 | leucine/valine                                 |  |  |
| D0J7L6     | CtCNB1_0010 | PF03401 | tricarboxylate                                 |  |  |
| D0J4F8     | CtCNB1_3626 | PF03401 | tricarboxylate                                 |  |  |
| D0IWZ9     | CtCNB1_2412 | PF03401 | tricarboxylate                                 |  |  |
| D0J328     | CtCNB1_1262 | PF03401 | tricarboxylate                                 |  |  |
| D0J294     | CtCNB1_1114 | PF03401 | tricarboxylate                                 |  |  |
| D0IVM6     | CtCNB1_2208 | PF03401 | tricarboxylate                                 |  |  |
| D0IW09     | CtCNB1_4499 | PF03401 | tricarboxylate                                 |  |  |
| D0J7Q3     | CtCNB1_2037 | PF03401 | tricarboxylate                                 |  |  |
| D0J6C0     | CtCNB1_1865 | PF00497 | amino acid<br>(glutamine/glutamate/aspartate?) |  |  |
| D0J246     | CtCNB1_3203 | PF12849 | phosphate                                      |  |  |
| D0IVH0     | CtCNB1_0160 | PF09084 | nitrate/sulfonate/taurine                      |  |  |
| D0J2L6     | CtCNB1_1236 | PF09084 | nitrate/sulfonate/taurine                      |  |  |
| A0A454XNR  | CtCNB1_3427 | PF03480 | C4-dicarboxylate                               |  |  |
| D0IWX1     | CtCNB1_2384 | PF04392 | Unclassified                                   |  |  |
| D0J068     | CtCNB1_0789 | PF13416 | sugar                                          |  |  |
| D0J2Y2     | CtCNB1_3359 | PF03401 | tricarboxylate                                 |  |  |
| D0J0I2     | CtCNB1_2907 | PF03180 | methionine                                     |  |  |

|                                         |                   |                  |                                                |                                          |                                       |
|-----------------------------------------|-------------------|------------------|------------------------------------------------|------------------------------------------|---------------------------------------|
| D0J6K3                                  | CtCNB1_3974       | PF03401          | tricarboxylate                                 |                                          |                                       |
| D0J0C1                                  | CtCNB1_0842       | PF03401          | tricarboxylate                                 |                                          |                                       |
| D0IUW5                                  | CtCNB1_4376       | PF13458          | leucine/valine                                 |                                          |                                       |
| D0IZJ4                                  | CtCNB1_0698       | PF00497          | amino acid<br>(glutamine/glutamate/aspartate?) |                                          |                                       |
| D0IXA0                                  | CtCNB1_4666       | PF00497          | amino acid<br>(glutamine/glutamate/aspartate?) |                                          |                                       |
| D0IVL5                                  | CtCNB1_2197       | PF03401          | tricarboxylate                                 |                                          |                                       |
| D0J2G1                                  | CtCNB1_1181       | PF01497          | iron-hydroxamate                               |                                          |                                       |
| D0J2N6                                  | CtCNB1_3263       | PF03401          | tricarboxylate                                 |                                          |                                       |
| D0IWG1                                  | CtCNB1_0233       | PF13458          | urea                                           |                                          |                                       |
| D0J6B9                                  | CtCNB1_1864       | PF03401          | tricarboxylate                                 |                                          |                                       |
| D0IV07                                  | CtCNB1_4418       | PF00496          | dipeptide/oligopeptide                         |                                          |                                       |
| D0J3K4                                  | CtCNB1_3452       | PF03401          | tricarboxylate                                 |                                          |                                       |
| A0A454XRN                               | CtCNB1_2959       | PF13458          | urea                                           |                                          |                                       |
| D0J504                                  | CtCNB1_3691       | PF01497          | iron-hydroxamate                               |                                          |                                       |
| D0J2A0                                  | CtCNB1_1120       | PF03401          | tricarboxylate                                 |                                          |                                       |
| D0IWD4                                  | CtCNB1_0206       | PF03401          | tricarboxylate                                 |                                          |                                       |
| D0IUX9                                  | CtCNB1_4390       | PF01497          | iron-hydroxamate                               |                                          |                                       |
| D0J7H9                                  | CtCNB1_4165       | PF03480          | C4-dicarboxylate                               |                                          |                                       |
| A0A454XNT                               | CtCNB1_0055       | PF03401          | tricarboxylate                                 |                                          |                                       |
| D0IWD5                                  | CtCNB1_0207       | PF03401          | tricarboxylate                                 |                                          |                                       |
| D0IV71                                  | CtCNB1_0061       | PF00497          | amino acid<br>(glutamine/glutamate/aspartate?) |                                          |                                       |
|                                         |                   |                  |                                                |                                          |                                       |
| <b><i>Azotobacter vinelandii</i> DJ</b> |                   |                  |                                                |                                          |                                       |
| Number of ORFs in the proteome: 4990    |                   |                  |                                                |                                          |                                       |
| Number of SBPs: 70 (1.40% of total)     |                   |                  |                                                |                                          |                                       |
| Lifestyle Summary: SOIL                 |                   |                  |                                                |                                          |                                       |
| <b>SeqID</b>                            | <b>Gene Locus</b> | <b>Pfam Code</b> | <b>Ligand prediction by TransportDB</b>        | <b>Experimentally identified ligands</b> | <b>References/pdb accession codes</b> |
| C1DLI2                                  | Avin_06790        | PF00497          | amino acid<br>(glutamine/glutamate/aspartate?) |                                          |                                       |

|        |            |         |                                                |  |  |
|--------|------------|---------|------------------------------------------------|--|--|
| C1DGS7 | Avin_44550 | PF09084 | phosphonates                                   |  |  |
| C1DID8 | Avin_03750 | PF03401 | tricarboxylate                                 |  |  |
| C1DFC2 | Avin_21240 | PF03401 | tricarboxylate                                 |  |  |
| C1DRJ7 | Avin_15200 | PF00497 | amino acid<br>(glutamine/glutamate/aspartate?) |  |  |
| C1DHN6 | Avin_24440 | PF00496 | dipeptide/oligopeptide                         |  |  |
| C1DLI4 | Avin_06810 | PF01497 | iron-hydroxamate                               |  |  |
| C1DJQ0 | Avin_26430 | PF01497 | iron-hydroxamate                               |  |  |
| C1DNA8 | Avin_31110 | PF09084 | nitrate/sulfonate/taurine                      |  |  |
| C1DM44 | Avin_29650 | PF00496 | oligopeptide                                   |  |  |
| C1DNU9 | Avin_31390 | PF09084 | nitrate/sulfonate/taurine                      |  |  |
| C1DLD0 | Avin_50340 | PF01497 | iron-hydroxamate                               |  |  |
| C1DSE2 | Avin_16838 | PF00497 | amino acid<br>(glutamine/glutamate/aspartate?) |  |  |
| C1DFD5 | Avin_21410 | PF00497 | amino acid<br>(glutamine/glutamate/aspartate?) |  |  |
| C1DFT7 | Avin_43620 | PF13407 | ribose                                         |  |  |
| C1DGJ8 | Avin_43730 | PF13458 | leucine/valine                                 |  |  |
| C1DNX8 | Avin_31680 | PF09084 | nitrate/sulfonate/taurine                      |  |  |
| C1DLB1 | Avin_50140 | PF13407 | xylose                                         |  |  |
| C1DM10 | Avin_29280 | PF01547 | sugar                                          |  |  |
| C1DNV0 | Avin_31400 | PF09084 | phosphonates                                   |  |  |
| C1DFF5 | Avin_21640 | PF09084 | nitrate/sulfonate/taurine                      |  |  |
| C1DGC2 | Avin_22420 | PF09084 | phosphonates                                   |  |  |
| C1DS61 | Avin_37920 | PF13407 | rhamnose                                       |  |  |
| C1DDV8 | Avin_18670 | PF00496 | dipeptide/oligopeptide                         |  |  |
| C1DMM8 | Avin_08130 | PF09084 | nitrate/sulfonate/taurine                      |  |  |
| C1DN49 | Avin_30510 | PF09084 | nitrate/sulfonate/taurine                      |  |  |
| C1DKR2 | Avin_27400 | PF01547 | sugar                                          |  |  |
| C1DM19 | Avin_29390 | PF09084 | glycine betaine                                |  |  |
| C1DE19 | Avin_39880 | PF01497 | iron-hydroxamate                               |  |  |
| C1DLC8 | Avin_50320 | PF13407 | rhamnose                                       |  |  |
| C1DGK0 | Avin_43750 | PF13458 | leucine/valine                                 |  |  |

|        |            |         |                                                |  |  |
|--------|------------|---------|------------------------------------------------|--|--|
| C1DGS4 | Avin_44520 | PF00497 | amino acid<br>(glutamine/glutamate/aspartate?) |  |  |
| C1DNU8 | Avin_31380 | PF09084 | nitrate/sulfonate/taurine                      |  |  |
| C1DPE4 | Avin_11470 | PF16868 | C4-dicarboxylate                               |  |  |
| C1DG23 | Avin_00830 | PF01297 | zinc ion                                       |  |  |
| C1DFT8 | Avin_43630 | PF13407 | ribose                                         |  |  |
| C1DL51 | Avin_49490 | PF03401 | tricarboxylate                                 |  |  |
| C1DL48 | Avin_49460 | PF03401 | tricarboxylate                                 |  |  |
| C1DMJ2 | Avin_51940 | PF00496 | dipeptide/oligopeptide                         |  |  |
| C1DFY5 | Avin_00450 | PF01497 | iron-hydroxamate                               |  |  |
| C1DFS6 | Avin_43510 | PF13458 | branched-chain amino acid                      |  |  |
| C1DID9 | Avin_03760 | PF09084 | nitrate/sulfonate/taurine                      |  |  |
| C1DGJ7 | Avin_43720 | PF13458 | leucine/valine                                 |  |  |
| C1DK05 | Avin_48060 | PF00496 | dipeptide/oligopeptide                         |  |  |
| C1DLN0 | Avin_07320 | PF00497 | amino acid<br>(glutamine/glutamate/aspartate?) |  |  |
| C1DNU6 | Avin_31360 | PF09084 | nitrate/sulfonate/taurine                      |  |  |
| C1DMN2 | Avin_08170 | PF09084 | nitrate/sulfonate/taurine                      |  |  |
| C1DNW1 | Avin_31510 | PF03180 | methionine                                     |  |  |
| C1DKB5 | Avin_49230 | PF13407 | rhamnose                                       |  |  |
| C1DEI9 | Avin_19650 | PF13458 | leucine/valine                                 |  |  |
| C1DG88 | Avin_22080 | PF13407 | xylose                                         |  |  |
| C1DG77 | Avin_21970 | PF09084 | nitrate/sulfonate/taurine                      |  |  |
| C1DIC8 | Avin_03650 | PF03480 | C4-dicarboxylate                               |  |  |
| C1DJ00 | Avin_47140 | PF01497 | iron-hydroxamate                               |  |  |
| C1DJM9 | Avin_26220 | PF13407 | xylose                                         |  |  |
| C1DGD0 | Avin_22500 | PF09084 | phosphonates                                   |  |  |
| C1DQ88 | Avin_13140 | PF04348 | Not annotated in TransportDB                   |  |  |
| C1DG71 | Avin_21910 | PF09084 | nitrate/sulfonate/taurine                      |  |  |
| C1DFG3 | Avin_21720 | PF09084 | nitrate/sulfonate/taurine                      |  |  |
| C1DK56 | Avin_48600 | PF12849 | phosphate                                      |  |  |
| C1DE36 | Avin_40070 | PF09084 | nitrate/sulfonate/taurine                      |  |  |
| C1DK71 | Avin_48760 | PF13416 | spermidine/putrescine                          |  |  |



| C1DN84                                    | Avin_30870 | PF01497   | iron-hydroxamate                               |                                                      |                                                                                                                  |
|-------------------------------------------|------------|-----------|------------------------------------------------|------------------------------------------------------|------------------------------------------------------------------------------------------------------------------|
| C1DJM1                                    | Avin_26140 | PF13458   | leucine/valine                                 |                                                      |                                                                                                                  |
| C1DLB0                                    | Avin_50130 | PF13407   | xylose                                         |                                                      |                                                                                                                  |
| C1DM43                                    | Avin_29640 | PF00496   | oligopeptide                                   |                                                      |                                                                                                                  |
| C1DJ76                                    | Avin_04030 | PF13407   | rhamnose                                       |                                                      |                                                                                                                  |
| C1DQ27                                    | Avin_12520 | PF00496   | dipeptide/oligopeptide                         |                                                      |                                                                                                                  |
| C1DKH5                                    | Avin_05850 | PF03401   | tricarboxylate                                 |                                                      |                                                                                                                  |
| C1DMG3                                    | Avin_51630 | PF13407   | rhamnose                                       |                                                      |                                                                                                                  |
| <b><i>Pseudomonas aeruginosa</i> PAO1</b> |            |           |                                                |                                                      |                                                                                                                  |
| Number of ORFs in the proteome: 5564      |            |           |                                                |                                                      |                                                                                                                  |
| Number of SBPs: 93 (1.67% of total)       |            |           |                                                |                                                      |                                                                                                                  |
| Lifestyle Summary: HUMAN/ANIMAL PATHOGEN  |            |           |                                                |                                                      |                                                                                                                  |
| SeqID                                     | Gene Locus | Pfam Code | Ligand prediction by TransportDB               | Experimentally identified ligands                    | References/pdb accession codes                                                                                   |
| Q9I6J0                                    | PA0301     | PF13416   | spermidine/putrescine                          | Spermidine                                           | doi: 10.1016/j.jmb.2012.01.010                                                                                   |
| Q9I6J1                                    | PA0300     | PF13416   | spermidine/putrescine                          | Putrescine and spermidine                            | doi: 10.1016/j.jmb.2012.01.010                                                                                   |
| Q51371                                    | PA3545     | PF05048   | Not annotated in TransportDB                   |                                                      |                                                                                                                  |
| Q01269                                    | PA3475     | PF00497   | amino acid<br>(glutamine/glutamate/aspartate?) |                                                      |                                                                                                                  |
| G3XDA8                                    | PA5369     | PF12849   | phosphate                                      | Phosphate                                            | doi: 10.1111/j.1432-1033.1984.tb08508.x; doi: 10.1111/j.1432-1033.1984.tb08508.x; doi: 10.1107/S2053230X14010279 |
| P35482                                    | PA0688     | PF12849   | phosphate                                      |                                                      |                                                                                                                  |
| Q9HU18                                    | PA5167     | PF03480   | C4-dicarboxylate                               | Succinate, fumarate and malate                       | doi: 10.1128/JB.05074-11                                                                                         |
| P21175                                    | PA1074     | PF13458   | leucine/valine                                 | Leucine, isoleucine. Valine, threonine, L-homoserine | doi: 10.1128/jb.171.11.6300-6306.1989; doi: 10.3390/ijms20205156                                                 |
| Q9HYL1                                    | PA3393     | PF05048   | Not annotated in TransportDB                   |                                                      |                                                                                                                  |

|        |        |         |                                                |                            |                           |
|--------|--------|---------|------------------------------------------------|----------------------------|---------------------------|
| Q9I3I2 | PA1531 | PF00497 | amino acid<br>(glutamine/glutamate/aspartate?) |                            |                           |
| Q9I0P1 | PA2596 | PF09084 | nitrate/sulfonate/taurine                      |                            |                           |
| Q9I0P2 | PA2595 | PF09084 | nitrate/sulfonate/taurine                      |                            |                           |
| Q9I484 | PA1260 | PF00497 | amino acid<br>(glutamine/glutamate/aspartate?) |                            |                           |
| Q9I2T3 | PA1811 | PF00496 | oligopeptide                                   |                            |                           |
| Q9HY96 | PA3513 | PF09084 | nitrate/sulfonate/taurine                      |                            |                           |
| Q9HX85 | PA3931 | PF03180 | methionine                                     |                            |                           |
| Q9HVS4 | PA4497 | PF00496 | dipeptide/oligopeptide                         | Many different tripeptides | doi: 10.3390/ijms20205156 |
| Q9HVR9 | PA4502 | PF00496 | dipeptide/oligopeptide                         |                            |                           |
| G3XD96 | PA0186 | PF09084 | nitrate/sulfonate/taurine                      |                            |                           |
| Q9HTT0 | PA5270 | PF00497 | amino acid<br>(glutamine/glutamate/aspartate?) |                            |                           |
| Q9HX00 | PA4027 | PF00497 | amino acid<br>(glutamine/glutamate/aspartate?) |                            |                           |
| Q9I0D1 | PA2711 | PF13416 | spermidine/putrescine                          |                            |                           |
| Q9HUA7 | PA5076 | PF00497 | amino acid<br>(glutamine/glutamate/aspartate?) |                            |                           |
| Q9I402 | PA1342 | PF00497 | amino acid<br>(glutamine/glutamate/aspartate?) | L-Asp, L-Glu               | doi: 10.3390/ijms20205156 |
| Q9HUI0 | PA4985 | PF13416 | spermidine/putrescine                          |                            |                           |
| Q9I6H7 | PA0314 | PF00497 | amino acid<br>(glutamine/glutamate/aspartate?) |                            |                           |
| Q9HXC4 | PA3889 | PF04069 | glycine betaine                                | Glycine betaine            | doi: 10.3390/ijms20205156 |
| Q9HZ48 | PA3190 | PF01547 | sugar                                          |                            |                           |
| Q9HWY3 | PA4045 | PF01497 | iron-hydroxamate                               |                            |                           |
| Q9I0P5 | PA2592 | PF13416 | spermidine/putrescine                          | Putrescine, cadaverine     | doi: 10.3390/ijms20205156 |
| Q9HTI6 | PA5378 | PF04069 | choline                                        |                            |                           |
| Q9I6R6 | PA0222 | PF13416 | spermidine/putrescine                          | GABA, 4-aminovalerate      | doi: 10.3390/ijms20205156 |
| Q9HU45 | PA5139 | PF00497 | amino acid<br>(glutamine/glutamate/aspartate?) |                            |                           |

|        |        |         |                                                |                                 |                           |
|--------|--------|---------|------------------------------------------------|---------------------------------|---------------------------|
| Q9I6G8 | PA0323 | PF13416 | spermidine/putrescine                          |                                 |                           |
| Q9I3T4 | PA1410 | PF13416 | spermidine/putrescine                          |                                 |                           |
| Q9I5T4 | PA0604 | PF13416 | spermidine/putrescine                          |                                 |                           |
| Q9HU31 | PA5153 | PF00497 | amino acid<br>(glutamine/glutamate/aspartate?) |                                 |                           |
| Q9HV90 | PA4708 | PF01497 | iron-hydroxamate                               |                                 |                           |
| Q9I6Y6 | PA0146 | PF02608 | sugar                                          |                                 |                           |
| Q9I1E0 | PA2338 | PF01547 | sugar                                          | Mannitol                        | doi: 10.3390/ijms20205156 |
| Q9I2T4 | PA1810 | PF00496 | oligopeptide                                   |                                 |                           |
| Q9I1C9 | PA2349 | PF03180 | methionine                                     |                                 |                           |
| Q9I5H5 | PA0754 | PF03401 | tricarboxylate                                 |                                 |                           |
| Q9HT75 | PA5498 | PF01297 | zinc ion                                       |                                 |                           |
| Q9I6T5 | PA0203 | PF13416 | spermidine/putrescine                          |                                 |                           |
| Q9I7A0 | PA0030 | PF04069 | choline                                        |                                 |                           |
| Q9HX78 | PA3938 | PF09084 | glycine betaine                                |                                 |                           |
| Q9HYG1 | PA3445 | PF09084 | glycine betaine                                |                                 |                           |
| Q9HXG8 | PA3836 | PF04392 | Unclassified                                   |                                 |                           |
| Q9HT29 | PA5545 | PF16868 | phosphonates                                   |                                 |                           |
| Q9HYF7 | PA3449 | PF09084 | phosphonates                                   |                                 |                           |
| Q9HZT4 | PA2913 | PF01497 | cobalamin                                      |                                 |                           |
| Q9HXE1 | PA3865 | PF00497 | amino acid<br>(glutamine/glutamate/aspartate?) |                                 |                           |
| Q9HZU5 | PA2902 | PF00497 | amino acid<br>(glutamine/glutamate/aspartate?) |                                 |                           |
| Q9HVZ2 | PA4423 | PF04348 | Not annotated in TransportDB                   |                                 |                           |
| Q9I0P3 | PA2594 | PF09084 | nitrate/sulfonate/taurine                      |                                 |                           |
| Q9I2F8 | PA1946 | PF13407 | rhamnose                                       | D-ribose; D-allose; D-arabinose | doi: 10.3390/ijms20205156 |
| Q9HXF8 | PA3848 | PF16868 | C4-dicarboxylate                               |                                 |                           |
| Q9HTN7 | PA5317 | PF00496 | dipeptide/oligopeptide                         |                                 |                           |
| Q9HT68 | PA5505 | PF03180 | methionine                                     |                                 |                           |
| Q9HU46 | PA5138 | PF00497 | amino acid<br>(glutamine/glutamate/aspartate?) |                                 |                           |

|        |        |         |                                                |                                                                                    |                                  |
|--------|--------|---------|------------------------------------------------|------------------------------------------------------------------------------------|----------------------------------|
| Q9I6J6 | PA0295 | PF13416 | spermidine/putrescine                          |                                                                                    |                                  |
| Q9HU47 | PA5137 | PF00497 | amino acid<br>(glutamine/glutamate/aspartate?) |                                                                                    |                                  |
| Q9HU80 | PA5103 | PF04069 | glycine betaine                                |                                                                                    |                                  |
| Q9HY16 | PA3610 | PF13416 | spermidine/putrescine                          |                                                                                    |                                  |
| Q9HVA8 | PA4687 | PF13416 | iron(III)                                      | Iron, gallium                                                                      | doi: 10.1021/accinfecdis.9b00271 |
| Q9HZ04 | PA3236 | PF04069 | glycine betaine                                |                                                                                    |                                  |
| Q9HUQ0 | PA4913 | PF13458 | leucine/valine                                 | Branched chain amino acids, Gly, Ala, Pro                                          | doi: 10.3390/ijms20205156        |
| Q9I5T6 | PA0602 | PF13416 | spermidine/putrescine                          |                                                                                    |                                  |
| Q9I257 | PA2058 | PF00496 | oligopeptide                                   |                                                                                    |                                  |
| Q9I174 | PA2407 | PF01297 | manganese/zinc ion                             | Iron, magnesium, zinc, calcium, manganese, nickel, zinc, cobaltum, copper, cadmium | doi: 10.1111/febs.15004          |
| Q9HZS4 | PA2923 | PF00497 | amino acid<br>(glutamine/glutamate/aspartate?) |                                                                                    |                                  |
| Q9HVS1 | PA4500 | PF00496 | dipeptide/oligopeptide                         | Many different dipeptides                                                          | doi: 10.3390/ijms20205156        |
| Q9I0N8 | PA2599 | PF09084 | glycine betaine                                |                                                                                    |                                  |
| Q9HU87 | PA5096 | PF04069 | glycine betaine                                |                                                                                    |                                  |
| Q9HTH6 | PA5388 | PF04069 | choline                                        |                                                                                    |                                  |
| Q9HXE8 | PA3858 | PF00497 | amino acid<br>(glutamine/glutamate/aspartate?) |                                                                                    |                                  |
| Q9I561 | PA0884 | PF03480 | C4-dicarboxylate                               |                                                                                    |                                  |
| Q9HWM2 | PA4159 | PF01497 | iron-hydroxamate                               |                                                                                    |                                  |
| G3XD47 | PA0888 | PF00497 | amino acid<br>(glutamine/glutamate/aspartate?) | Arginine, Phospho-L-arginine                                                       | doi: 10.3390/ijms20205156        |
| Q9HWI6 | PA4195 | PF00497 | amino acid<br>(glutamine/glutamate/aspartate?) |                                                                                    |                                  |
| Q9HVS5 | PA4496 | PF00496 | dipeptide/oligopeptide                         |                                                                                    |                                  |
| Q9HVV5 | PA4616 | PF03480 | C4-dicarboxylate                               | L-malate                                                                           | doi: 10.1021/bi501388y.          |

| Q9I1Q8                                                              | PA2209     | PF03401   | tricarboxylate                                 |                                   |                                |
|---------------------------------------------------------------------|------------|-----------|------------------------------------------------|-----------------------------------|--------------------------------|
| Q9I171                                                              | PA2410     | PF01297   | manganese/zinc ion                             |                                   |                                |
| Q9HXY9                                                              | PA3261     | PF00497   | amino acid<br>(glutamine/glutamate/aspartate?) |                                   |                                |
| Q9HXL6                                                              | PA3779     | PF03480   | C4-dicarboxylate                               |                                   |                                |
| Q9HUA1                                                              | PA5082     | PF00497   | amino acid<br>(glutamine/glutamate/aspartate?) |                                   |                                |
| Q9I3B7                                                              | PA1604     | PF00497   | amino acid<br>(glutamine/glutamate/aspartate?) |                                   |                                |
| Q9I5N7                                                              | PA0689     | PF12849   | phosphate                                      |                                   |                                |
| Q9HX57                                                              | PA3959     | PF00497   | Unclassified                                   |                                   |                                |
| Q9I1R3                                                              | PA2204     | PF00497   | amino acid<br>(glutamine/glutamate/aspartate?) |                                   |                                |
| Q9HWX9                                                              | PA4049     | PF00497   | amino acid<br>(glutamine/glutamate/aspartate?) |                                   |                                |
|                                                                     |            |           |                                                |                                   |                                |
| <b><i>Photorhabdus luminescens</i> subsp. <i>laumondii</i> TTO1</b> |            |           |                                                |                                   |                                |
| Number of ORFs in the proteome: 4556                                |            |           |                                                |                                   |                                |
| Number of SBPs: 33 (0.72% of total)                                 |            |           |                                                |                                   |                                |
| Lifestyle Summary: HUMAN/ANIMAL PATHOGEN                            |            |           |                                                |                                   |                                |
| SeqID                                                               | Gene Locus | Pfam Code | Ligand prediction by TransportDB               | Experimentally identified ligands | References/pdb accession codes |
| Q7MB18                                                              | plu3146    | PF13407   | rhamnose                                       |                                   |                                |
| Q7N842                                                              | plu0905    | PF01497   | iron-hydroxamate                               |                                   |                                |
| Q7N985                                                              | plu0458    | PF13416   | sugar (maltose?)                               |                                   |                                |
| Q7N4I7                                                              | plu2350    | PF00496   | oligopeptide                                   |                                   |                                |
| Q7N006                                                              | plu4098    | PF13458   | leucine/valine                                 |                                   |                                |
| Q7N460                                                              | plu2494    | PF00496   | oligopeptide                                   |                                   |                                |
| Q7N8U8                                                              | plu0619    | PF01547   | thiamin                                        |                                   |                                |
| Q7MZ24                                                              | plu4484    | PF00497   | amino acid<br>(glutamine/glutamate/aspartate?) |                                   |                                |
| Q7N3X5                                                              | plu2587    | PF00496   | oligopeptide                                   |                                   |                                |
| Q7N777                                                              | plu1281    | PF04069   | glycine betaine                                |                                   |                                |

|                                                             |         |         |                                                |  |  |
|-------------------------------------------------------------|---------|---------|------------------------------------------------|--|--|
| Q7MZ21                                                      | plu4487 | PF00497 | amino acid<br>(glutamine/glutamate/aspartate?) |  |  |
| Q7N9X9                                                      | plu0172 | PF03480 | C4-dicarboxylate                               |  |  |
| Q7N461                                                      | plu2493 | PF00496 | oligopeptide                                   |  |  |
| Q7N9U7                                                      | plu0214 | PF12849 | phosphate                                      |  |  |
| Q7N9M2                                                      | plu0300 | PF00496 | dipeptide/oligopeptide                         |  |  |
| Q7MZL6                                                      | plu4267 | PF13458 | leucine/valine                                 |  |  |
| Q7N3S9                                                      | plu2634 | PF01497 | iron-hydroxamate                               |  |  |
| Q7N9U2                                                      | plu0219 | PF00497 | amino acid<br>(glutamine/glutamate/aspartate?) |  |  |
| Q7N751                                                      | plu1307 | PF00497 | amino acid<br>(glutamine/glutamate/aspartate?) |  |  |
| Q7N091                                                      | plu4002 | PF04348 | leucine/valine                                 |  |  |
| Q7NA77                                                      | plu0058 | PF13407 | ribose                                         |  |  |
| Q7N8M4                                                      | plu0695 | PF03180 | methionine                                     |  |  |
| Q7N3P3                                                      | plu2672 | PF01297 | manganese/zinc ion                             |  |  |
| Q7N0Z1                                                      | plu3738 | PF01497 | iron-hydroxamate                               |  |  |
| Q7N6G3                                                      | plu1587 | PF00497 | amino acid<br>(glutamine/glutamate/aspartate?) |  |  |
| Q7MZ54                                                      | plu4447 | PF01497 | iron-hydroxamate                               |  |  |
| Q7N2A7                                                      | plu3181 | PF03401 | tricarboxylate                                 |  |  |
| Q7N3Y4                                                      | plu2578 | PF00496 | oligopeptide                                   |  |  |
| Q7MYQ2                                                      | plu4623 | PF01497 | iron-hydroxamate                               |  |  |
| Q7N7H5                                                      | plu1174 | PF01497 | iron-hydroxamate                               |  |  |
| Q7N544                                                      | plu2115 | PF01297 | zinc ion                                       |  |  |
| Q7N368                                                      | plu2853 | PF01497 | iron-hydroxamate                               |  |  |
| Q7N4V3                                                      | plu2212 | PF00496 | oligopeptide                                   |  |  |
| <b><i>Pseudomonas syringae</i> pv. <i>tomato</i> DC3000</b> |         |         |                                                |  |  |
| Number of ORFs in the proteome: 5431                        |         |         |                                                |  |  |
| Number of SBPs: 95 (1.75% of total)                         |         |         |                                                |  |  |
| Lifestyle Summary: PLANT PATHOGEN                           |         |         |                                                |  |  |

| SeqID  | Gene Locus | Pfam Code | Ligand prediction by TransportDB               | Experimentally identified ligands | References/pdb accession codes |
|--------|------------|-----------|------------------------------------------------|-----------------------------------|--------------------------------|
| Q885K6 | PSPTO_1826 | PF00497   | amino acid<br>(glutamine/glutamate/aspartate?) |                                   |                                |
| Q88B53 | PSPTO_0166 | PF04069   | choline                                        |                                   |                                |
| Q881A0 | PSPTO_2996 | PF13407   | ribose                                         |                                   |                                |
| Q883E1 | PSPTO_2423 | PF09084   | nitrate/sulfonate/taurine                      |                                   |                                |
| Q87WL2 | PSPTO_4534 | PF00496   | dipeptide/oligopeptide                         |                                   |                                |
| Q880R4 | PSPTO_3088 | PF00496   | dipeptide/oligopeptide                         |                                   |                                |
| Q882J2 | PSPTO_2635 | PF01297   | manganese/zinc ion                             |                                   |                                |
| Q87XP0 | PSPTO_4136 | PF00497   | amino acid<br>(glutamine/glutamate/aspartate?) |                                   |                                |
| Q881U7 | PSPTO_2785 | PF13416   | spermidine/putrescine                          |                                   |                                |
| Q888X5 | PSPTO_0889 | PF01547   | sugar                                          |                                   |                                |
| Q87WH3 | PSPTO_4577 | PF04069   | glycine betaine                                |                                   |                                |
| Q88AM5 | PSPTO_0364 | PF01547   | sugar                                          |                                   |                                |
| Q880R9 | PSPTO_3082 | PF00497   | amino acid<br>(glutamine/glutamate/aspartate?) |                                   |                                |
| Q889I6 | PSPTO_0763 | PF01497   | iron-hydroxamate                               |                                   |                                |
| Q886J4 | PSPTO_1585 | PF00497   | amino acid<br>(glutamine/glutamate/aspartate?) |                                   |                                |
| Q887K0 | PSPTO_1292 | PF13416   | sugar                                          |                                   |                                |
| Q889J0 | PSPTO_0759 | PF02608   | sugar                                          |                                   |                                |
| Q87UN6 | PSPTO_5260 | PF03180   | methionine                                     |                                   |                                |
| Q88BD0 | PSPTO_0087 | PF00496   | dipeptide/oligopeptide                         |                                   |                                |
| Q87XE0 | PSPTO_4238 | PF09084   | nitrate/sulfonate/taurine                      |                                   |                                |
| Q883J0 | PSPTO_2367 | PF13407   | rhamnose                                       |                                   |                                |
| Q87UM8 | PSPTO_5268 | PF01297   | zinc ion                                       |                                   |                                |
| Q87YS6 | PSPTO_3716 | PF00496   | oligopeptide                                   |                                   |                                |
| Q881R9 | PSPTO_2814 | PF00496   | dipeptide/oligopeptide                         |                                   |                                |
| Q87WI7 | PSPTO_4559 | PF00496   | dipeptide/oligopeptide                         |                                   |                                |
| Q881Z8 | PSPTO_2731 | PF13407   | ribose                                         |                                   |                                |
| Q880Z3 | PSPTO_3003 | PF13407   | xylose                                         |                                   |                                |

|        |            |         |                                                |  |  |
|--------|------------|---------|------------------------------------------------|--|--|
| Q886F7 | PSPTO_1622 | PF04069 | glycine betaine                                |  |  |
| Q87WI8 | PSPTO_4558 | PF00496 | dipeptide/oligopeptide                         |  |  |
| Q887X1 | PSPTO_1159 | PF02608 | sugar                                          |  |  |
| Q87UE1 | PSPTO_5358 | PF00497 | amino acid<br>(glutamine/glutamate/aspartate?) |  |  |
| Q880V2 | PSPTO_3049 | PF13407 | xylose                                         |  |  |
| Q880U3 | PSPTO_3058 | PF04069 | glycine betaine                                |  |  |
| Q88AC8 | PSPTO_0464 | PF04069 | choline                                        |  |  |
| Q87UW2 | PSPTO_5180 | PF00497 | amino acid<br>(glutamine/glutamate/aspartate?) |  |  |
| Q87UG5 | PSPTO_5333 | PF00497 | amino acid<br>(glutamine/glutamate/aspartate?) |  |  |
| Q87WI9 | PSPTO_4557 | PF00496 | dipeptide/oligopeptide                         |  |  |
| Q882K0 | PSPTO_2627 | PF00497 | amino acid<br>(glutamine/glutamate/aspartate?) |  |  |
| Q881A9 | PSPTO_2987 | PF13458 | branched-chain amino acid                      |  |  |
| Q885P3 | PSPTO_1788 | PF09084 | nitrate/sulfonate/taurine                      |  |  |
| Q87XI1 | PSPTO_4197 | PF13416 | spermidine/putrescine                          |  |  |
| Q88A34 | PSPTO_0563 | PF13416 | spermidine/putrescine                          |  |  |
| Q87UT0 | PSPTO_5216 | PF03180 | methionine                                     |  |  |
| Q887N6 | PSPTO_1255 | PF00497 | amino acid<br>(glutamine/glutamate/aspartate?) |  |  |
| Q87UJ0 | PSPTO_5307 | PF13416 | spermidine/putrescine                          |  |  |
| Q880X1 | PSPTO_3029 | PF00496 | oligopeptide                                   |  |  |
| Q882V4 | PSPTO_2518 | PF13416 | 2-aminoethylphosphonate                        |  |  |
| Q881V7 | PSPTO_2775 | PF00497 | amino acid<br>(glutamine/glutamate/aspartate?) |  |  |
| Q87UJ1 | PSPTO_5306 | PF13416 | spermidine/putrescine                          |  |  |
| Q87VC9 | PSPTO_5010 | PF00497 | amino acid<br>(glutamine/glutamate/aspartate?) |  |  |
| Q884A9 | PSPTO_2187 | PF00497 | amino acid<br>(glutamine/glutamate/aspartate?) |  |  |
| Q87ZD9 | PSPTO_3490 | PF13407 | xylose                                         |  |  |



|        |            |         |                                                |  |  |
|--------|------------|---------|------------------------------------------------|--|--|
| Q880A3 | PSPTO_3269 | PF12849 | phosphate                                      |  |  |
| Q887Z6 | PSPTO_1134 | PF00497 | amino acid<br>(glutamine/glutamate/aspartate?) |  |  |
| Q886H9 | PSPTO_1600 | PF04069 | glycine betaine                                |  |  |
| Q882P9 | PSPTO_2576 | PF00496 | dipeptide/oligopeptide                         |  |  |
| Q87XE6 | PSPTO_4232 | PF03401 | tricarboxylate                                 |  |  |
| Q87YQ9 | PSPTO_3735 | PF13416 | sugar                                          |  |  |
| Q87WX4 | PSPTO_4419 | PF04348 | leucine/valine                                 |  |  |
| Q882Z9 | PSPTO_2473 | PF13407 | xylose                                         |  |  |
| Q87VL7 | PSPTO_4919 | PF13458 | leucine/valine                                 |  |  |
| Q87XK7 | PSPTO_4171 | PF00497 | amino acid<br>(glutamine/glutamate/aspartate?) |  |  |
| Q87UV5 | PSPTO_5187 | PF03180 | methionine                                     |  |  |
| Q882I9 | PSPTO_2638 | PF00532 | ribose                                         |  |  |
| Q882G1 | PSPTO_2667 | PF13416 | spermidine/putrescine                          |  |  |
| Q87UI1 | PSPTO_5316 | PF09084 | glycine betaine                                |  |  |
| Q883G4 | PSPTO_2399 | PF13407 | xylose                                         |  |  |
| Q87WI5 | PSPTO_4561 | PF00496 | dipeptide/oligopeptide                         |  |  |
| Q881I1 | PSPTO_2912 | PF00497 | amino acid<br>(glutamine/glutamate/aspartate?) |  |  |
| Q880B6 | PSPTO_3256 | PF01497 | cobalamin                                      |  |  |
| Q885P0 | PSPTO_1791 | PF09084 | phosphonates                                   |  |  |
| Q882C2 | PSPTO_2707 | PF01547 | sugar                                          |  |  |
| Q887D6 | PSPTO_1360 | PF02608 | sugar                                          |  |  |
| Q884F2 | PSPTO_2141 | PF01297 | manganese/zinc ion                             |  |  |
| Q887G1 | PSPTO_1335 | PF00497 | amino acid<br>(glutamine/glutamate/aspartate?) |  |  |
| Q87U28 | PSPTO_5487 | PF12849 | phosphate                                      |  |  |
| Q889T3 | PSPTO_0664 | PF13416 | sugar                                          |  |  |
| Q87UM5 | PSPTO_5271 | PF04069 | glycine betaine                                |  |  |
| Q88AS2 | PSPTO_0314 | PF13416 | 2-aminoethylphosphonate                        |  |  |
| Q880C3 | PSPTO_3248 | PF00496 | dipeptide/oligopeptide                         |  |  |

| Q880Y8                                      | PSPTO_3008 | PF00497   | amino acid<br>(glutamine/glutamate/aspartate?) |                                   |                                |
|---------------------------------------------|------------|-----------|------------------------------------------------|-----------------------------------|--------------------------------|
| Q881U4                                      | PSPTO_2788 | PF09084   | nitrate/sulfonate/taurine                      |                                   |                                |
| Q87YS5                                      | PSPTO_3717 | PF00496   | oligopeptide                                   |                                   |                                |
| Q884F5                                      | PSPTO_2138 | PF01297   | manganese/zinc ion                             |                                   |                                |
| Q87YZ2                                      | PSPTO_3647 | PF00497   | amino acid<br>(glutamine/glutamate/aspartate?) |                                   |                                |
| Q886U0                                      | PSPTO_1486 | PF00497   | Not annotated in TransportDB                   |                                   |                                |
| Q87XR8                                      | PSPTO_4108 | PF13458   | leucine/valine                                 |                                   |                                |
| Q87UQ1                                      | PSPTO_5245 | PF00497   | amino acid<br>(glutamine/glutamate/aspartate?) |                                   |                                |
| Q88AY4                                      | PSPTO_0249 | PF00496   | dipeptide/oligopeptide                         |                                   |                                |
| Q88AW6                                      | PSPTO_0267 | PF00496   | oligopeptide                                   |                                   |                                |
| Q87UH8                                      | PSPTO_5319 | PF09084   | glycine betaine                                |                                   |                                |
| Q87TV8                                      | PSPTO_5562 | PF01497   | cobalamin                                      |                                   |                                |
| Q884R4                                      | PSPTO_2024 | PF00497   | amino acid<br>(glutamine/glutamate/aspartate?) |                                   |                                |
| Q881D2                                      | PSPTO_2962 | PF13458   | leucine/valine                                 |                                   |                                |
| Q888H3                                      | PSPTO_1051 | PF03480   | C4-dicarboxylate                               |                                   |                                |
|                                             |            |           |                                                |                                   |                                |
| <b><i>Bordetella pertussis</i> Tohama I</b> |            |           |                                                |                                   |                                |
| Number of ORFs in the proteome: 3258        |            |           |                                                |                                   |                                |
| Number of SBPs: 167 (5.13% of total)        |            |           |                                                |                                   |                                |
| Lifestyle Summary: HUMAN/ANIMAL PATHOGEN    |            |           |                                                |                                   |                                |
| SeqID                                       | Gene Locus | Pfam Code | Ligand prediction by TransportDB               | Experimentally identified ligands | References/pdb accession codes |
| O30446                                      | BP0148     | PF03401   | tricarboxylate                                 |                                   |                                |
| Q45389                                      | BP3782     | PF03401   | tricarboxylate                                 |                                   |                                |
| Q7VY55                                      | BP1507     | PF00497   | amino acid<br>(glutamine/glutamate/aspartate?) |                                   |                                |
| Q7VYN8                                      | BP1277     | PF13458   | leucine/valine                                 |                                   |                                |
| Q7VU18                                      | BP3322     | PF13458   | leucine/valine                                 |                                   |                                |
| Q7VSG4                                      | BP0461     | PF09084   | nitrate/sulfonate/taurine                      |                                   |                                |

|        |        |         |                                                |  |  |
|--------|--------|---------|------------------------------------------------|--|--|
| Q7VS23 | BP0633 | PF03401 | tricarboxylate                                 |  |  |
| Q7VXB9 | BP1864 | PF03480 | C4-dicarboxylate                               |  |  |
| Q7VTS6 | BP3434 | PF03180 | methionine                                     |  |  |
| Q7VXF2 | BP1823 | PF00496 | dipeptide/oligopeptide                         |  |  |
| Q7VVQ0 | BP2594 | PF00496 | dipeptide/oligopeptide                         |  |  |
| Q7VZ63 | BP1071 | PF12849 | phosphate                                      |  |  |
| Q7VYI3 | BP1354 | PF03401 | tricarboxylate                                 |  |  |
| Q7VXF5 | BP1819 | PF13416 | sugar                                          |  |  |
| Q7VY56 | BP1506 | PF13458 | leucine/valine                                 |  |  |
| Q7VY76 | BP1480 | PF12849 | tungsten                                       |  |  |
| Q7W061 | BP0301 | PF13458 | urea                                           |  |  |
| Q7VSK8 | BP0403 | PF16868 | phosphonates                                   |  |  |
| Q7VVC9 | BP2747 | PF13458 | leucine/valine                                 |  |  |
| Q7VS60 | BP0589 | PF03480 | C4-dicarboxylate                               |  |  |
| Q7VT77 | BP3674 | PF09084 | glycine betaine                                |  |  |
| Q7VWG3 | BP2293 | PF00496 | dipeptide/oligopeptide                         |  |  |
| Q7VYN5 | BP1281 | PF13416 | sugar                                          |  |  |
| Q7VYH5 | BP1364 | PF00497 | amino acid<br>(glutamine/glutamate/aspartate?) |  |  |
| Q7VSR6 | BP3862 | PF00496 | dipeptide/oligopeptide                         |  |  |
| Q7VUD9 | BP3159 | PF00496 | dipeptide/oligopeptide                         |  |  |
| Q7W0P0 | BP0057 | PF00497 | amino acid<br>(glutamine/glutamate/aspartate?) |  |  |
| Q7VZJ2 | BP0913 | PF09084 | nitrate/sulfonate/taurine                      |  |  |
| Q7VS56 | BP0593 | PF09084 | nitrate/sulfonate/taurine                      |  |  |
| Q7VWX0 | BP2066 | PF03401 | tricarboxylate                                 |  |  |
| Q7VVL6 | BP2638 | PF13416 | sugar                                          |  |  |
| Q7W018 | BP0683 | PF09084 | Not annotated in TransportDB                   |  |  |
| Q7VW51 | BP2418 | PF13458 | urea                                           |  |  |
| Q7VRZ6 | BP0663 | PF09084 | nitrate/sulfonate/taurine                      |  |  |
| Q7VYU9 | BP1208 | PF03401 | tricarboxylate                                 |  |  |
| Q7VX60 | BP1948 | PF13458 | urea                                           |  |  |
| Q7VV16 | BP2895 | PF03401 | tricarboxylate                                 |  |  |

|        |        |         |                                                |                                                                   |                                |
|--------|--------|---------|------------------------------------------------|-------------------------------------------------------------------|--------------------------------|
| Q7VTG8 | BP3572 | PF04069 | glycine betaine                                |                                                                   |                                |
| Q7VXR3 | BP1675 | PF03401 | tricarboxylate                                 |                                                                   |                                |
| Q7U360 | BP2835 | PF13416 | sugar                                          |                                                                   |                                |
| Q7VU78 | BP3245 | PF03401 | tricarboxylate                                 |                                                                   |                                |
| Q7W032 | BP0334 | PF03401 | tricarboxylate                                 |                                                                   |                                |
| Q7VVN1 | BP2616 | PF09084 | nitrate/sulfonate/taurine                      |                                                                   |                                |
| Q7VS15 | BP0641 | PF03401 | tricarboxylate                                 |                                                                   |                                |
| Q7VZH6 | BP0931 | PF03401 | tricarboxylate                                 |                                                                   |                                |
| Q7VSH2 | BP0452 | PF03401 | tricarboxylate                                 |                                                                   |                                |
| Q7VS81 | BP0561 | PF03401 | tricarboxylate                                 |                                                                   |                                |
| Q7VW44 | BP2425 | PF03401 | tricarboxylate                                 |                                                                   |                                |
| Q7W0N0 | BP0069 | PF03480 | C4-dicarboxylate                               |                                                                   |                                |
| Q7VYX9 | BP1170 | PF03401 | tricarboxylate                                 |                                                                   |                                |
| Q7VT58 | BP3696 | PF03401 | tricarboxylate                                 |                                                                   |                                |
| Q7VX52 | BP1965 | PF03401 | tricarboxylate                                 |                                                                   |                                |
| Q79GS0 | BP2231 | PF04392 | Unclassified                                   |                                                                   |                                |
| Q7VZW5 | BP0765 | PF00497 | amino acid<br>(glutamine/glutamate/aspartate?) |                                                                   |                                |
| Q7VUA0 | BP3219 | PF03401 | tricarboxylate                                 |                                                                   |                                |
| Q7VZS1 | BP0819 | PF03401 | tricarboxylate                                 |                                                                   |                                |
| Q7W096 | BP0254 | PF03401 | tricarboxylate                                 |                                                                   |                                |
| Q7W019 | BP0682 | PF03401 | tricarboxylate                                 | Nicotinate, nicotinamide,<br>citrate, benzoate, quinaldic<br>acid | doi: 10.1016/j.jmb.2007.08.006 |
| Q7VSP0 | BP0363 | PF00497 | amino acid<br>(glutamine/glutamate/aspartate?) |                                                                   |                                |
| Q7VUV7 | BP2963 | PF03480 | C4-dicarboxylate                               |                                                                   |                                |
| Q7VTR0 | BP3454 | PF03401 | tricarboxylate                                 |                                                                   |                                |
| Q7VVJ6 | BP2661 | PF03480 | C4-dicarboxylate                               |                                                                   |                                |
| Q7VZW0 | BP0771 | PF03401 | tricarboxylate                                 |                                                                   |                                |
| Q7VZI0 | BP0927 | PF03401 | tricarboxylate                                 |                                                                   |                                |
| Q7VTJ2 | BP3544 | PF03401 | tricarboxylate                                 |                                                                   |                                |
| Q7VVW2 | BP2523 | PF03401 | tricarboxylate                                 |                                                                   |                                |

|        |        |         |                                                |                   |                                |
|--------|--------|---------|------------------------------------------------|-------------------|--------------------------------|
| Q7W036 | BP0330 | PF03401 | tricarboxylate                                 |                   |                                |
| Q7VVI8 | BP2671 | PF03480 | C4-dicarboxylate                               |                   |                                |
| Q7VV65 | BP2826 | PF03401 | tricarboxylate                                 |                   |                                |
| Q7VWA8 | BP2352 | PF03480 | C4-dicarboxylate                               |                   |                                |
| Q7VY31 | BP1532 | PF00497 | amino acid<br>(glutamine/glutamate/aspartate?) |                   |                                |
| Q7VZS8 | BP0810 | PF03401 | tricarboxylate                                 |                   |                                |
| Q7W0B2 | BP0237 | PF03401 | tricarboxylate                                 |                   |                                |
| Q7VTM2 | BP3501 | PF03401 | tricarboxylate                                 |                   |                                |
| Q7VY71 | BP1487 | PF03480 | C4-dicarboxylate                               |                   |                                |
| Q7VST2 | BP3843 | PF03401 | tricarboxylate                                 |                   |                                |
| Q7VRY8 | BP0671 | PF03401 | tricarboxylate                                 |                   |                                |
| Q7VZS3 | BP0817 | PF03401 | tricarboxylate                                 |                   |                                |
| Q7VYZ0 | BP1160 | PF03401 | tricarboxylate                                 |                   |                                |
| Q7VUI5 | BP3106 | PF03401 | tricarboxylate                                 |                   |                                |
| Q7VV33 | BP2873 | PF03401 | tricarboxylate                                 |                   |                                |
| Q7VXB1 | BP1891 | PF03480 | C4-dicarboxylate                               | Pyroglutamic acid | doi: 10.1016/j.jmb.2007.04.047 |
| Q7VXN9 | BP1708 | PF09084 | phosphonates                                   |                   |                                |
| Q7W0E0 | BP0200 | PF03401 | tricarboxylate                                 |                   |                                |
| Q7VVK9 | BP2647 | PF03401 | tricarboxylate                                 |                   |                                |
| Q7VSJ7 | BP0418 | PF03401 | tricarboxylate                                 |                   |                                |
| Q7W0B4 | BP0234 | PF03480 | C4-dicarboxylate                               |                   |                                |
| Q7VT85 | BP3666 | PF03401 | tricarboxylate                                 |                   |                                |
| Q7VXP2 | BP1705 | PF03480 | C4-dicarboxylate                               |                   |                                |
| Q7VSE5 | BP0486 | PF03401 | tricarboxylate                                 |                   |                                |
| Q7W0J5 | BP0121 | PF13416 | sugar                                          |                   |                                |
| Q7VSU5 | BP3827 | PF03401 | tricarboxylate                                 |                   |                                |
| Q7VTS1 | BP3440 | PF03401 | tricarboxylate                                 | Aspartate         | doi: 10.1016/j.jmb.2005.11.096 |
| Q7VUC5 | BP3178 | PF03401 | tricarboxylate                                 |                   |                                |
| Q7VYI0 | BP1358 | PF03401 | tricarboxylate                                 |                   |                                |
| Q7VXT9 | BP1644 | PF03401 | tricarboxylate                                 |                   |                                |
| Q7VT56 | BP3700 | PF03401 | tricarboxylate                                 |                   |                                |
| Q7VV83 | BP2802 | PF03401 | tricarboxylate                                 |                   |                                |

|        |        |         |                        |                   |                                |
|--------|--------|---------|------------------------|-------------------|--------------------------------|
| Q7VT81 | BP3670 | PF03401 | tricarboxylate         |                   |                                |
| Q7VWT9 | BP2103 | PF03401 | tricarboxylate         |                   |                                |
| Q7VXQ9 | BP1685 | PF03401 | tricarboxylate         |                   |                                |
| Q7VVK4 | BP2653 | PF03401 | tricarboxylate         |                   |                                |
| Q7VT01 | BP3756 | PF03401 | tricarboxylate         |                   |                                |
| Q7VRZ5 | BP0664 | PF03401 | tricarboxylate         |                   |                                |
| Q7VVX2 | BP2513 | PF03401 | tricarboxylate         |                   |                                |
| Q7VZH3 | BP0935 | PF03401 | tricarboxylate         |                   |                                |
| Q7VXS1 | BP1667 | PF03401 | tricarboxylate         |                   |                                |
| Q7VS39 | BP0612 | PF03401 | tricarboxylate         |                   |                                |
| Q7VUR4 | BP3012 | PF03401 | tricarboxylate         |                   |                                |
| Q7VSA6 | BP0531 | PF03401 | tricarboxylate         |                   |                                |
| Q7VT49 | BP3707 | PF03401 | tricarboxylate         |                   |                                |
| Q7VX73 | BP1934 | PF03401 | tricarboxylate         |                   |                                |
| Q7VTH2 | BP3568 | PF13458 | leucine/valine         |                   |                                |
| Q7VVH3 | BP2692 | PF00496 | dipeptide/oligopeptide |                   |                                |
| Q7W0N5 | BP0063 | PF03401 | tricarboxylate         |                   |                                |
| Q7VZN6 | BP0861 | PF03401 | tricarboxylate         |                   |                                |
| Q7VX39 | BP1983 | PF00496 | dipeptide/oligopeptide |                   |                                |
| Q7VX85 | BP1920 | PF03480 | C4-dicarboxylate       |                   |                                |
| Q7VZT0 | BP0807 | PF03401 | tricarboxylate         |                   |                                |
| Q7VXB3 | BP1887 | PF03480 | C4-dicarboxylate       | Pyroglutamic acid | doi: 10.1016/j.jmb.2007.04.047 |
| Q7VUX3 | BP2943 | PF03401 | tricarboxylate         |                   |                                |
| Q7VZ12 | BP1131 | PF03401 | tricarboxylate         |                   |                                |
| Q7VTT3 | BP3427 | PF13458 | urea                   |                   |                                |
| Q7VS05 | BP0654 | PF03401 | tricarboxylate         | Aspartate         | doi: 10.1016/j.jmb.2005.11.096 |
| Q7VS98 | BP0542 | PF03401 | tricarboxylate         |                   |                                |
| Q7VS10 | BP0649 | PF03401 | tricarboxylate         |                   |                                |
| Q7VXI3 | BP1780 | PF03401 | tricarboxylate         |                   |                                |
| Q7W0A0 | BP0250 | PF03401 | tricarboxylate         | Glutamate         | doi: 10.1107/S0907444906032653 |
| Q7VT40 | BP3716 | PF13458 | leucine/valine         |                   |                                |

|        |        |         |                                                |                       |           |
|--------|--------|---------|------------------------------------------------|-----------------------|-----------|
| Q7VXZ7 | BP1573 | PF00497 | amino acid<br>(glutamine/glutamate/aspartate?) |                       |           |
| Q7VS37 | BP0615 | PF03401 | tricarboxylate                                 |                       |           |
| Q7VWJ6 | BP2219 | PF16868 | phosphonate                                    |                       |           |
| Q7VYM6 | BP1292 | PF03180 | methionine                                     |                       |           |
| Q7VT55 | BP3701 | PF09084 | glycine betaine                                |                       |           |
| Q7VTE6 | BP3596 | PF01497 | iron-hydroxamate                               |                       |           |
| Q7VV70 | BP2818 | PF03180 | methionine                                     |                       |           |
| Q7VU86 | BP3237 | PF00496 | dipeptide/oligopeptide                         |                       |           |
| Q7VZZ0 | BP0726 | PF00496 | dipeptide/oligopeptide                         |                       |           |
| Q7VXA4 | BP1900 | PF03401 | tricarboxylate                                 |                       |           |
| Q7VSM1 | BP0385 | PF03180 | methionine                                     |                       |           |
| Q7VX79 | BP1926 | PF13416 | spermidine/putrescine                          |                       |           |
| Q7VUB2 | BP3196 | PF13458 | leucine/valine                                 |                       |           |
| Q7VSQ6 | BP0345 | PF01497 | iron-hydroxamate                               |                       |           |
| Q7VZV0 | BP0782 | PF09084 | nitrate/sulfonate/taurine                      |                       |           |
| Q7W074 | BP0284 | PF00496 | dipeptide/oligopeptide                         |                       |           |
| Q7VSH0 | BP0454 | PF16868 | phosphonate                                    |                       |           |
| Q7VYN1 | BP1285 | PF13458 | leucine/valine                                 |                       |           |
| Q7VWV1 | BP2090 | PF13458 | leucine/valine                                 |                       |           |
| Q7VZ42 | BP1097 | PF13458 | urea                                           |                       |           |
| Q7VWB2 | BP2348 | PF13416 | spermidine/putrescine                          |                       |           |
| Q7VSW7 | BP3802 | PF00496 | dipeptide/oligopeptide                         |                       |           |
| Q7VSS3 | BP3855 | PF09084 | nitrate/sulfonate/taurine                      |                       |           |
| Q7VW70 | BP2396 | PF00496 | dipeptide/oligopeptide                         |                       |           |
| Q7VWS8 | BP2116 | PF03401 | tricarboxylate                                 |                       |           |
| Q7VUK6 | BP3080 | PF01297 | manganese/zinc ion                             |                       |           |
| Q7VS83 | BP0558 | PF00497 | amino acid<br>(glutamine/glutamate/aspartate?) |                       |           |
| Q7VWX9 | BP2055 | PF04069 | glycine betaine                                |                       |           |
| Q7VS30 | BP0622 | PF13458 | leucine/valine                                 | 3-hydroxybenzoic acid | PDB: 4Q6W |
| Q7VWW8 | BP2068 | PF04392 | Unclassified                                   |                       |           |

|                                             |                   |                  |                                                |                                          |                                       |
|---------------------------------------------|-------------------|------------------|------------------------------------------------|------------------------------------------|---------------------------------------|
| Q7VYW9                                      | BP1184            | PF00497          | amino acid<br>(glutamine/glutamate/aspartate?) |                                          |                                       |
| Q7VT52                                      | BP3704            | PF09084          | glycine betaine                                |                                          |                                       |
| Q7VXC7                                      | BP1852            | PF00497          | amino acid<br>(glutamine/glutamate/aspartate?) |                                          |                                       |
| Q7VXR5                                      | BP1673            | PF03401          | tricarboxylate                                 |                                          |                                       |
| Q7VSU1                                      | BP3831            | PF00497          | amino acid<br>(glutamine/glutamate/aspartate?) |                                          |                                       |
| Q7VY34                                      | BP1529            | PF00497          | amino acid<br>(glutamine/glutamate/aspartate?) |                                          |                                       |
| Q7VTG5                                      | BP3575            | PF13458          | urea                                           |                                          |                                       |
| Q7VSR1                                      | BP3867            | PF03401          | tricarboxylate                                 |                                          |                                       |
|                                             |                   |                  |                                                |                                          |                                       |
| <b><i>Pseudomonas fluorescens</i> Pf0-1</b> |                   |                  |                                                |                                          |                                       |
| Number of ORFs in the proteome: 5712        |                   |                  |                                                |                                          |                                       |
| Number of SBPs: 94 (1.65% of total)         |                   |                  |                                                |                                          |                                       |
| Lifestyle Summary: SOIL                     |                   |                  |                                                |                                          |                                       |
| <b>SeqID</b>                                | <b>Gene Locus</b> | <b>Pfam Code</b> | <b>Ligand prediction by TransportDB</b>        | <b>Experimentally identified ligands</b> | <b>References/pdb accession codes</b> |
| Q3K987                                      | PfI01_3930        | PF01297          | manganese/zinc ion                             |                                          |                                       |
| Q3KEJ9                                      | PfI01_2064        | PF00497          | amino acid<br>(glutamine/glutamate/aspartate?) |                                          |                                       |
| Q3K8M6                                      | PfI01_4141        | PF00532          | ribose                                         |                                          |                                       |
| Q3K5C8                                      | PfI01_5289        | PF00497          | amino acid<br>(glutamine/glutamate/aspartate?) |                                          |                                       |
| Q3KHP0                                      | PfI01_0973        | PF00497          | amino acid<br>(glutamine/glutamate/aspartate?) |                                          |                                       |
| Q3KKD7                                      | PfI01_0025        | PF04069          | choline                                        |                                          |                                       |
| Q3K6R7                                      | PfI01_4800        | PF01497          | iron-hydroxamate                               |                                          |                                       |
| Q3KB22                                      | PfI01_3294        | PF09084          | nitrate/sulfonate/taurine                      |                                          |                                       |
| Q3KI47                                      | PfI01_0816        | PF00496          | dipeptide/oligopeptide                         |                                          |                                       |
| Q3K974                                      | PfI01_3943        | PF00497          | amino acid<br>(glutamine/glutamate/aspartate?) |                                          |                                       |



|        |            |         |                                                |  |  |
|--------|------------|---------|------------------------------------------------|--|--|
| Q3K4D6 | PfI01_5632 | PF13416 | spermidine/putrescine                          |  |  |
| Q3K9S5 | PfI01_3741 | PF00496 | oligopeptide                                   |  |  |
| Q3K4M9 | PfI01_5538 | PF00496 | dipeptide/oligopeptide                         |  |  |
| Q3K4F2 | PfI01_5615 | PF12849 | phosphate                                      |  |  |
| Q3K658 | PfI01_5009 | PF01497 | iron-hydroxamate                               |  |  |
| Q3KE81 | PfI01_2182 | PF00496 | oligopeptide                                   |  |  |
| Q3KCG2 | PfI01_2802 | PF00497 | amino acid<br>(glutamine/glutamate/aspartate?) |  |  |
| Q3KEZ4 | PfI01_1919 | PF13407 | rhamnose                                       |  |  |
| Q3K5I7 | PfI01_5230 | PF04069 | choline                                        |  |  |
| Q3K4A7 | PfI01_5661 | PF01297 | manganese/zinc ion                             |  |  |
| Q3K503 | PfI01_5414 | PF09084 | glycine betaine                                |  |  |
| Q3KBP3 | PfI01_3073 | PF00496 | oligopeptide                                   |  |  |
| Q3K528 | PfI01_5389 | PF00497 | amino acid<br>(glutamine/glutamate/aspartate?) |  |  |
| Q3KB75 | PfI01_3241 | PF13416 | spermidine/putrescine                          |  |  |
| Q3KJF0 | PfI01_0362 | PF04069 | glycine betaine                                |  |  |
| Q3KJD7 | PfI01_0375 | PF00497 | amino acid<br>(glutamine/glutamate/aspartate?) |  |  |
| Q3KJE3 | PfI01_0369 | PF04069 | choline                                        |  |  |
| Q3K7I2 | PfI01_4535 | PF00497 | amino acid<br>(glutamine/glutamate/aspartate?) |  |  |
| Q3KAL2 | PfI01_3454 | PF03480 | C4-dicarboxylate                               |  |  |
| Q3K733 | PfI01_4684 | PF04348 | leucine/valine                                 |  |  |
| Q3KDS3 | PfI01_2340 | PF13407 | rhamnose                                       |  |  |
| Q3KGW5 | PfI01_1248 | PF13458 | leucine/valine                                 |  |  |
| Q3KD39 | PfI01_2575 | PF13416 | spermidine/putrescine                          |  |  |
| Q3K9K2 | PfI01_3814 | PF00497 | amino acid<br>(glutamine/glutamate/aspartate?) |  |  |
| Q3K513 | PfI01_5404 | PF13416 | spermidine/putrescine                          |  |  |
| Q3K8Q2 | PfI01_4115 | PF00497 | amino acid<br>(glutamine/glutamate/aspartate?) |  |  |
| Q3KCX4 | PfI01_2640 | PF01547 | sugar                                          |  |  |

|        |            |         |                                                |  |  |
|--------|------------|---------|------------------------------------------------|--|--|
| Q3KAZ7 | PfI01_3319 | PF04069 | glycine betaine                                |  |  |
| Q3K4Z9 | PfI01_5418 | PF09084 | glycine betaine                                |  |  |
| Q3KFV7 | PfI01_1606 | PF04069 | glycine betaine                                |  |  |
| Q3K5D5 | PfI01_5282 | PF00497 | amino acid<br>(glutamine/glutamate/aspartate?) |  |  |
| Q3KH03 | PfI01_1210 | PF00497 | amino acid<br>(glutamine/glutamate/aspartate?) |  |  |
| Q3K823 | PfI01_4344 | PF04069 | glycine betaine                                |  |  |
| Q3KEE6 | PfI01_2117 | PF13416 | spermidine/putrescine                          |  |  |
| Q3KGM0 | PfI01_1343 | PF09084 | nitrate/sulfonate/taurine                      |  |  |
| Q3KBE4 | PfI01_3172 | PF12849 | phosphate                                      |  |  |
| Q3KDW1 | PfI01_2302 | PF13407 | xylose                                         |  |  |
| Q3KE82 | PfI01_2181 | PF00496 | oligopeptide                                   |  |  |
| Q3KCI4 | PfI01_2780 | PF04069 | glycine betaine                                |  |  |
| Q3KEA8 | PfI01_2155 | PF13416 | spermidine/putrescine                          |  |  |
| Q3KBK6 | PfI01_3110 | PF13407 | ribose                                         |  |  |
| Q3KBH1 | PfI01_3145 | PF13416 | spermidine/putrescine                          |  |  |
| Q3K4V8 | PfI01_5459 | PF00497 | amino acid<br>(glutamine/glutamate/aspartate?) |  |  |
| Q3KBJ6 | PfI01_3120 | PF00496 | oligopeptide                                   |  |  |
| Q3KJV1 | PfI01_0211 | PF09084 | phosphonates                                   |  |  |
| Q3KKA3 | PfI01_0059 | PF01297 | zinc ion                                       |  |  |
| Q3KB23 | PfI01_3293 | PF09084 | glycine betaine                                |  |  |
| Q3K5U3 | PfI01_5124 | PF13416 | spermidine/putrescine                          |  |  |
| Q3KI50 | PfI01_0813 | PF00496 | dipeptide/oligopeptide                         |  |  |
| Q3KJI4 | PfI01_0328 | PF00497 | amino acid<br>(glutamine/glutamate/aspartate?) |  |  |
| Q3KCD5 | PfI01_2829 | PF13416 | spermidine/putrescine                          |  |  |
| Q3KII9 | PfI01_0673 | PF02608 | sugar                                          |  |  |
| Q3KJQ6 | PfI01_0256 | PF09084 | glycine betaine                                |  |  |
| Q3KJT9 | PfI01_0223 | PF03180 | methionine                                     |  |  |
| Q3KCT7 | PfI01_2677 | PF13416 | spermidine/putrescine                          |  |  |
| Q3KB56 | PfI01_3260 | PF13416 | spermidine/putrescine                          |  |  |

|        |            |         |                                                |  |  |
|--------|------------|---------|------------------------------------------------|--|--|
| Q3KJS5 | PfI01_0237 | PF03180 | methionine                                     |  |  |
| Q3KIW0 | PfI01_0552 | PF13458 | leucine/valine                                 |  |  |
| Q3KI48 | PfI01_0815 | PF00496 | dipeptide/oligopeptide                         |  |  |
| Q3KBM4 | PfI01_3092 | PF00497 | amino acid<br>(glutamine/glutamate/aspartate?) |  |  |
| Q3KFA9 | PfI01_1804 | PF00497 | Unclassified                                   |  |  |
| Q3KHP6 | PfI01_0967 | PF00497 | amino acid<br>(glutamine/glutamate/aspartate?) |  |  |
| Q3K7P8 | PfI01_4469 | PF13416 | spermidine/putrescine                          |  |  |
| Q3KHG5 | PfI01_1048 | PF13416 | spermidine/putrescine                          |  |  |
| Q3K5G6 | PfI01_5251 | PF00497 | amino acid<br>(glutamine/glutamate/aspartate?) |  |  |
| Q3K990 | PfI01_3927 | PF01297 | manganese/zinc ion                             |  |  |
| Q3KCA9 | PfI01_2855 | PF00497 | amino acid<br>(glutamine/glutamate/aspartate?) |  |  |
| Q3KDP1 | PfI01_2372 | PF13416 | spermidine/putrescine                          |  |  |
| Q3K512 | PfI01_5405 | PF13416 | spermidine/putrescine                          |  |  |
| Q3KB11 | PfI01_3305 | PF00497 | amino acid<br>(glutamine/glutamate/aspartate?) |  |  |
| Q3KJK1 | PfI01_0311 | PF00497 | amino acid<br>(glutamine/glutamate/aspartate?) |  |  |
| Q3K655 | PfI01_5012 | PF00497 | amino acid<br>(glutamine/glutamate/aspartate?) |  |  |
| Q3K5H9 | PfI01_5238 | PF04069 | choline                                        |  |  |
| Q3KDS8 | PfI01_2335 | PF03180 | methionine                                     |  |  |
| Q3KJT4 | PfI01_0228 | PF00497 | amino acid<br>(glutamine/glutamate/aspartate?) |  |  |
| Q3KK95 | PfI01_0067 | PF03180 | methionine                                     |  |  |
| Q3K6D6 | PfI01_4931 | PF09084 | nitrate/sulfonate/taurine                      |  |  |
| Q3K875 | PfI01_4292 | PF00497 | amino acid<br>(glutamine/glutamate/aspartate?) |  |  |
| Q3KGL0 | PfI01_1353 | PF03401 | tricarboxylate                                 |  |  |
| Q3K7Z7 | PfI01_4370 | PF13416 | N-acetylglucosamine                            |  |  |

| Q3KJR8                                   | PfI01_0244 | PF00497   | amino acid<br>(glutamine/glutamate/aspartate?) |                                   |                                |
|------------------------------------------|------------|-----------|------------------------------------------------|-----------------------------------|--------------------------------|
| Q3KIS0                                   | PfI01_0592 | PF01497   | cobalamin                                      |                                   |                                |
| Q3KAD4                                   | PfI01_3532 | PF13416   | spermidine/putrescine                          |                                   |                                |
| Q3KI58                                   | PfI01_0805 | PF04069   | glycine betaine                                |                                   |                                |
| <b><i>Brucella abortus</i> 2308</b>      |            |           |                                                |                                   |                                |
| Number of ORFs in the proteome: 3023     |            |           |                                                |                                   |                                |
| Number of SBPs: 62 (2.05% of total)      |            |           |                                                |                                   |                                |
| Lifestyle Summary: HUMAN/ANIMAL PATHOGEN |            |           |                                                |                                   |                                |
| SeqID                                    | Gene Locus | Pfam Code | Ligand prediction by TransportDB               | Experimentally identified ligands | References/pdb accession codes |
| Q2YKR5                                   | BAB2_0585  | PF13416   | sugar                                          |                                   |                                |
| Q2YJB6                                   | BAB2_1146  | PF09084   | phosphonates                                   |                                   |                                |
| Q2YLW8                                   | BAB1_1770  | PF01547   | thiamin                                        |                                   |                                |
| Q2YKJ5                                   | BAB2_0664  | PF00496   | oligopeptide                                   |                                   |                                |
| Q2YL86                                   | BAB2_0023  | PF13458   | urea                                           |                                   |                                |
| Q2YLG0                                   | BAB1_1792  | PF13458   | leucine/valine                                 |                                   |                                |
| Q2YLF8                                   | BAB1_1794  | PF13458   | leucine/valine                                 |                                   |                                |
| Q2YK58                                   | BAB2_0822  | PF13458   | leucine/valine                                 |                                   |                                |
| Q2YKZ9                                   | BAB2_0491  | PF01547   | sugar                                          |                                   |                                |
| Q2YJK2                                   | BAB2_1049  | PF00496   | dipeptide/oligopeptide                         |                                   |                                |
| Q2YK66                                   | BAB2_0812  | PF00496   | dipeptide/oligopeptide                         |                                   |                                |
| Q2YJH5                                   | BAB2_1079  | PF01297   | zinc ion                                       | Zinc                              | doi: 10.1128/IAI.01957-05      |
| Q2YK50                                   | BAB2_0830  | PF13458   | leucine/valine                                 |                                   |                                |
| Q2YKI6                                   | BAB2_0673  | PF02608   | sugar                                          | Adenine                           | PDB: 3S99                      |
| Q2YKQ9                                   | BAB2_0593  | PF13458   | urea                                           |                                   |                                |
| Q2YJA9                                   | BAB2_1153  | PF13458   | leucine/valine                                 |                                   |                                |
| Q2YL39                                   | BAB2_0451  | PF00496   | dipeptide/oligopeptide                         |                                   |                                |
| Q2YIY2                                   | BAB2_0377  | PF13407   | xylose                                         |                                   |                                |
| Q2YRY0                                   | BAB1_1593  | PF04069   | choline                                        |                                   |                                |
| Q2YJW3                                   | BAB2_0927  | PF05048   | Not annotated in TransportDB                   |                                   |                                |
| Q2YKZ2                                   | BAB2_0502  | PF04069   | glycine betaine                                |                                   |                                |

|        |           |         |                                                |                                                                            |                          |
|--------|-----------|---------|------------------------------------------------|----------------------------------------------------------------------------|--------------------------|
| Q2YQQ6 | BAB1_2176 | PF03180 | methionine                                     |                                                                            |                          |
| Q2YKU0 | BAB2_0558 | PF00497 | amino acid<br>(glutamine/glutamate/aspartate?) |                                                                            |                          |
| Q2YJ40 | BAB2_0427 | PF13416 | thiamin                                        |                                                                            |                          |
| Q2YK03 | BAB2_0879 | PF13416 | spermidine/putrescine                          |                                                                            |                          |
| Q2YJV3 | BAB2_0938 | PF13407 | xylose                                         |                                                                            |                          |
| Q2YJS2 | BAB2_0974 | PF00496 | dipeptide/oligopeptide                         |                                                                            |                          |
| Q2YP76 | BAB1_0226 | PF04069 | glycine betaine                                | Glycine-betaine, choline,<br>ectoine, proline, carnitine<br>(low affinity) | doi: 10.1128/JB.00746-16 |
| Q2YQM0 | BAB1_1313 | PF13458 | leucine/valine                                 |                                                                            |                          |
| Q2YK97 | BAB2_0767 | PF09084 | nitrate/sulfonate/taurine                      |                                                                            |                          |
| Q2YP60 | BAB1_0214 | PF09084 | nitrate/sulfonate/taurine                      |                                                                            |                          |
| Q2YLB9 | BAB2_0282 | PF13458 | urea                                           |                                                                            |                          |
| Q2YMQ4 | BAB1_0567 | PF13407 | xylose                                         |                                                                            |                          |
| Q2YJK7 | BAB2_1043 | PF00496 | dipeptide/oligopeptide                         |                                                                            |                          |
| Q2YKT4 | BAB2_0564 | PF01497 | iron-hydroxamate                               |                                                                            |                          |
| Q2YRX3 | BAB1_1600 | PF00496 | dipeptide/oligopeptide                         |                                                                            |                          |
| Q2YNH7 | BAB1_0881 | PF00497 | amino acid<br>(glutamine/glutamate/aspartate?) |                                                                            |                          |
| Q2YJI9 | BAB2_1062 | PF13416 | spermidine/putrescine                          |                                                                            |                          |
| Q2YQD1 | BAB1_1366 | PF01497 | iron-hydroxamate                               |                                                                            |                          |
| Q2YJJ6 | BAB2_1055 | PF00496 | dipeptide/oligopeptide                         |                                                                            |                          |
| Q2YLW5 | BAB1_1954 | PF00497 | amino acid<br>(glutamine/glutamate/aspartate?) |                                                                            |                          |
| Q2YQA1 | BAB1_1628 | PF13416 | spermidine/putrescine                          |                                                                            |                          |
| Q2YLB5 | BAB2_0286 | PF00497 | amino acid<br>(glutamine/glutamate/aspartate?) |                                                                            |                          |
| Q2YKP5 | BAB2_0611 | PF00497 | amino acid<br>(glutamine/glutamate/aspartate?) |                                                                            |                          |
| Q2YRV5 | BAB1_1216 | PF16868 | glycine betaine                                |                                                                            |                          |
| Q2YKG0 | BAB2_0700 | PF00496 | oligopeptide                                   |                                                                            |                          |

| Q2YQB8                                   | BAB1_1648  | PF13407   | xylose                                         |                                   |                                |
|------------------------------------------|------------|-----------|------------------------------------------------|-----------------------------------|--------------------------------|
| Q2YLA0                                   | BAB2_0009  | PF02608   | sugar                                          |                                   |                                |
| Q2YL07                                   | BAB2_0483  | PF01497   | cobalamin                                      |                                   |                                |
| Q2YIV4                                   | BAB2_0275  | PF03180   | methionine                                     |                                   |                                |
| Q2YJE8                                   | BAB2_1109  | PF13407   | xylose                                         |                                   |                                |
| Q2YKG1                                   | BAB2_0699  | PF00496   | oligopeptide                                   |                                   |                                |
| Q2YPL6                                   | BAB1_0010  | PF00496   | oligopeptide                                   |                                   |                                |
| Q2YQU1                                   | BAB1_2141  | PF12849   | phosphate                                      |                                   |                                |
| Q2YJC7                                   | BAB2_1132  | PF13458   | urea                                           |                                   |                                |
| Q2YPE4                                   | BAB1_0325  | PF00497   | amino acid<br>(glutamine/glutamate/aspartate?) |                                   |                                |
| Q2YPL7                                   | BAB1_0009  | PF00496   | oligopeptide                                   |                                   |                                |
| Q2YQE3                                   | BAB1_1362  | PF13407   | ribose                                         |                                   |                                |
| Q2YPK1                                   | BAB1_0373  | PF03480   | C4-dicarboxylate                               |                                   |                                |
| Q2YKU9                                   | BAB2_0547  | PF01547   | sugar                                          |                                   |                                |
| Q2YKP4                                   | BAB2_0612  | PF00497   | amino acid<br>(glutamine/glutamate/aspartate?) |                                   |                                |
| Q2YR20                                   | BAB1_2054  | PF04392   | Unclassified                                   |                                   |                                |
|                                          |            |           |                                                |                                   |                                |
| <b>Acinetobacter baumannii AYE</b>       |            |           |                                                |                                   |                                |
| Number of ORFs in the proteome: 3652     |            |           |                                                |                                   |                                |
| Number of SBPs: 18 (0.49% of total)      |            |           |                                                |                                   |                                |
| Lifestyle Summary: HUMAN/ANIMAL PATHOGEN |            |           |                                                |                                   |                                |
| SeqID                                    | Gene Locus | Pfam Code | Ligand prediction by TransportDB               | Experimentally identified ligands | References/pdb accession codes |
| B0VBK4                                   | ABAYE2253  | PF00497   | amino acid<br>(glutamine/glutamate/aspartate?) |                                   |                                |
| B0VBK5                                   | ABAYE2254  | PF00497   | amino acid<br>(glutamine/glutamate/aspartate?) |                                   |                                |
| B0VC68                                   | ABAYE2161  | PF00497   | amino acid<br>(glutamine/glutamate/aspartate?) |                                   |                                |
| B0VBM8                                   | ABAYE3725  | PF01297   | zinc ion                                       |                                   |                                |
| B0VAB4                                   | ABAYE2662  | PF00496   | oligopeptide                                   |                                   |                                |

| B0VC25                                          | ABAYE2212  | PF04069   | glycine betaine                                |                                   |                                |
|-------------------------------------------------|------------|-----------|------------------------------------------------|-----------------------------------|--------------------------------|
| B0VAD5                                          | ABAYE2638  | PF03180   | methionine                                     |                                   |                                |
| B0V5V7                                          | ABAYE3840  | PF09084   | glycine betaine                                |                                   |                                |
| B0V7E3                                          | ABAYE1409  | PF09084   | nitrate/sulfonate/taurine                      |                                   |                                |
| B0VBB8                                          | ABAYE1177  | PF00497   | amino acid<br>(glutamine/glutamate/aspartate?) |                                   |                                |
| B0VC73                                          | ABAYE2167  | PF03180   | methionine                                     |                                   |                                |
| B0VBU2                                          | ABAYE1092  | PF01497   | iron-hydroxamate                               |                                   |                                |
| B0VC74                                          | ABAYE2168  | PF03180   | methionine                                     |                                   |                                |
| B0VB10                                          | ABAYE2421  | PF09084   | nitrate/sulfonate/taurine                      |                                   |                                |
| B0VD28                                          | ABAYE2044  | PF00496   | dipeptide/oligopeptide                         |                                   |                                |
| B0VBZ9                                          | ABAYE1032  | PF12849   | phosphate                                      |                                   |                                |
| B0V7H3                                          | ABAYE1365  | PF03180   | methionine                                     |                                   |                                |
| B0VD29                                          | ABAYE2045  | PF00496   | dipeptide/oligopeptide                         |                                   |                                |
|                                                 |            |           |                                                |                                   |                                |
| <b><i>Nocardia brasiliensis</i> ATCC 700358</b> |            |           |                                                |                                   |                                |
| Number of ORFs in the proteome: 8414            |            |           |                                                |                                   |                                |
| Number of SBPs: 80 (0.95% of total)             |            |           |                                                |                                   |                                |
| Lifestyle Summary: HUMAN/ANIMAL PATHOGEN        |            |           |                                                |                                   |                                |
| SeqID                                           | Gene Locus | Pfam Code | Ligand prediction by TransportDB               | Experimentally identified ligands | References/pdb accession codes |
| KOEFU5                                          | O3I_000600 | PF00496   | dipeptide/oligopeptide                         |                                   |                                |
| KOEN58                                          | O3I_001835 | PF00496   | oligopeptide                                   |                                   |                                |
| KOF7Q8                                          | O3I_027885 | PF00497   | amino acid<br>(glutamine/glutamate/aspartate?) |                                   |                                |
| KOF6L6                                          | O3I_035340 | PF13458   | urea                                           |                                   |                                |
| KOENN9                                          | O3I_003230 | PF00496   | dipeptide/oligopeptide                         |                                   |                                |
| KOF0Z0                                          | O3I_016925 | PF09084   | nitrate/sulfonate/taurine                      |                                   |                                |
| KOEJ32                                          | O3I_007000 | PF13407   | xylose                                         |                                   |                                |
| KOETD2                                          | O3I_004790 | PF16868   | Unclassified                                   |                                   |                                |
| KOEVJ2                                          | O3I_015740 | PF01297   | zinc                                           |                                   |                                |
| KOENA3                                          | O3I_002505 | PF01297   | zinc                                           |                                   |                                |
| KOEV74                                          | O3I_017505 | PF13407   | xylose                                         |                                   |                                |

|        |            |         |                                                |  |  |
|--------|------------|---------|------------------------------------------------|--|--|
| KOF0B2 | O3I_023250 | PF00496 | dipeptide/oligopeptide                         |  |  |
| KOFC11 | O3I_035645 | PF04069 | glycine betaine                                |  |  |
| KOF8J3 | O3I_029135 | PF01547 | sugar                                          |  |  |
| KOETM2 | O3I_012440 | PF00497 | amino acid<br>(glutamine/glutamate/aspartate?) |  |  |
| KOET74 | O3I_013580 | PF13407 | ribose                                         |  |  |
| KOEXB1 | O3I_032845 | PF02608 | sugar                                          |  |  |
| KOEMP7 | O3I_014510 | PF01547 | sugar                                          |  |  |
| KOEUX5 | O3I_014740 | PF13407 | ribose                                         |  |  |
| KOF1C6 | O3I_027665 | PF03180 | methionine                                     |  |  |
| KOELI1 | O3I_012060 | PF01497 | cobalamin                                      |  |  |
| KOEWS9 | O3I_016620 | PF13416 | sugar                                          |  |  |
| KOEYB9 | O3I_022760 | PF01497 | Gene locus not annotated in Uniprot            |  |  |
| KOEXK5 | O3I_011625 | PF00497 | amino acid<br>(glutamine/glutamate/aspartate?) |  |  |
| KOEH37 | O3I_003150 | PF13458 | urea                                           |  |  |
| KOF4D2 | O3I_033040 | PF01497 | iron-hydroxamate                               |  |  |
| KOESD0 | O3I_012080 | PF09084 | nitrate/sulfonate/taurine                      |  |  |
| KOEUL3 | O3I_027670 | PF03180 | methionine                                     |  |  |
| KOEV70 | O3I_017455 | PF16868 | phosphonates                                   |  |  |
| KOET66 | O3I_004315 | PF01497 | iron-hydroxamate                               |  |  |
| KOETA3 | O3I_011615 | PF00496 | dipeptide/oligopeptide                         |  |  |
| KOEP46 | O3I_017460 | PF16868 | phosphonates                                   |  |  |
| KOEQS4 | O3I_020995 | PF01497 | iron-hydroxamate                               |  |  |
| KOF7A5 | O3I_026935 | PF09084 | nitrate/sulfonate/taurine                      |  |  |
| KOEYI7 | O3I_013200 | PF00496 | dipeptide/oligopeptide                         |  |  |
| KOEPB9 | O3I_004380 | PF01497 | iron-hydroxamate                               |  |  |
| KOF5A7 | O3I_032730 | PF00496 | oligopeptide                                   |  |  |
| KOEWS5 | O3I_010550 | PF01547 | sugar                                          |  |  |
| KOF6F8 | O3I_025400 | PF01497 | iron-hydroxamate                               |  |  |
| KOEZS6 | O3I_023245 | PF00496 | dipeptide/oligopeptide                         |  |  |
| KOF6N5 | O3I_036885 | PF00496 | dipeptide/oligopeptide                         |  |  |
| KOF4S5 | O3I_033590 | PF00496 | oligopeptide                                   |  |  |



|        |            |         |                                                |  |  |
|--------|------------|---------|------------------------------------------------|--|--|
| KOF284 | O3I_018885 | PF00496 | dipeptide/oligopeptide                         |  |  |
| KOF3R8 | O3I_032165 | PF01497 | iron-hydroxamate                               |  |  |
| KOEM50 | O3I_000605 | PF00496 | dipeptide/oligopeptide                         |  |  |
| KOEY51 | O3I_012800 | PF00497 | amino acid<br>(glutamine/glutamate/aspartate?) |  |  |
| KOF598 | O3I_034390 | PF01497 | cobalamin                                      |  |  |
| KOF4C9 | O3I_022305 | PF13407 | rhamnose                                       |  |  |
| KOFC69 | O3I_036020 | PF04069 | glycine betaine                                |  |  |
| KOF002 | O3I_025480 | PF01547 | sugar                                          |  |  |
| KOF9A7 | O3I_040050 | PF00497 | amino acid<br>(glutamine/glutamate/aspartate?) |  |  |
| KOEJ14 | O3I_006850 | PF13407 | xylose                                         |  |  |
| KOEV66 | O3I_007540 | PF00496 | dipeptide/oligopeptide                         |  |  |
| KOF2E6 | O3I_041990 | PF13416 | sugar                                          |  |  |
| KOEWV3 | O3I_031820 | PF13407 | rhamnose                                       |  |  |
| KOF1Y4 | O3I_028790 | PF00496 | dipeptide/oligopeptide                         |  |  |
| KOEYH6 | O3I_022985 | PF09084 | nitrate/sulfonate/taurine                      |  |  |
| KOF384 | O3I_029975 | PF00497 | amino acid<br>(glutamine/glutamate/aspartate?) |  |  |
| KOF521 | O3I_034015 | PF00496 | oligopeptide                                   |  |  |
| KOEUA6 | O3I_012520 | PF13458 | leucine/valine                                 |  |  |
| KOF2T2 | O3I_027505 | PF01547 | sugar                                          |  |  |
| KOF0S0 | O3I_025415 | PF01497 | iron-hydroxamate                               |  |  |
| KOEUL8 | O3I_013195 | PF00496 | dipeptide/oligopeptide                         |  |  |
| KOETM0 | O3I_025945 | PF09084 | nitrate/sulfonate/taurine                      |  |  |
| KOF4P3 | O3I_033175 | PF00496 | dipeptide/oligopeptide                         |  |  |
| KOEH75 | O3I_003350 | PF12849 | phosphate                                      |  |  |
| KOF1Y0 | O3I_041240 | PF01547 | sugar                                          |  |  |
| KOEU14 | O3I_013840 | PF01547 | sugar                                          |  |  |
| KOF6N8 | O3I_025885 | PF00497 | amino acid<br>(glutamine/glutamate/aspartate?) |  |  |
| KOEV98 | O3I_015315 | PF13407 | ribose                                         |  |  |
| KOERV9 | O3I_022965 | PF09084 | nitrate/sulfonate/taurine                      |  |  |

| K0EYV0                                         | O3I_021325        | PF04069          | glycine betaine                                |                                          |                                       |
|------------------------------------------------|-------------------|------------------|------------------------------------------------|------------------------------------------|---------------------------------------|
| K0F7X1                                         | O3I_039360        | PF13416          | sugar                                          |                                          |                                       |
| K0F5X5                                         | O3I_035950        | PF00496          | dipeptide/oligopeptide                         |                                          |                                       |
| K0F4X5                                         | O3I_023180        | PF00496          | dipeptide/oligopeptide                         |                                          |                                       |
| K0EXX3                                         | O3I_021860        | PF13458          | leucine/valine                                 |                                          |                                       |
| K0ELW1                                         | O3I_012885        | PF00496          | dipeptide/oligopeptide                         |                                          |                                       |
| K0F5R4                                         | O3I_035650        | PF04069          | glycine betaine                                |                                          |                                       |
| K0EZL0                                         | O3I_037305        | PF13407          | xylose                                         |                                          |                                       |
| K0F7V6                                         | O3I_039260        | PF09084          | nitrate/sulfonate/taurine                      |                                          |                                       |
|                                                |                   |                  |                                                |                                          |                                       |
| <b>Lactobacillus acidophilus NCFM</b>          |                   |                  |                                                |                                          |                                       |
| Number of ORFs in the proteome: 1859           |                   |                  |                                                |                                          |                                       |
| Number of SBPs: 29 (1.56% of total)            |                   |                  |                                                |                                          |                                       |
| Lifestyle Summary: HUMAN INTESTINAL MICROFLORA |                   |                  |                                                |                                          |                                       |
| <b>SeqID</b>                                   | <b>Gene Locus</b> | <b>Pfam Code</b> | <b>Ligand prediction by TransportDB</b>        | <b>Experimentally identified ligands</b> | <b>References/pdb accession codes</b> |
| Q5FKL3                                         | LBA0904           | PF03180          | methionine                                     |                                          |                                       |
| Q5FI08                                         | LBA1866           | PF13416          | sugar (maltose?)                               |                                          |                                       |
| G1UB54                                         | LBA1442           | PF01547          | sugar                                          |                                          |                                       |
| Q5FHS2                                         | LBA1958           | PF00496          | oligopeptide                                   |                                          |                                       |
| Q5FJJ3                                         | LBA1301           | PF00496          | dipeptide/oligopeptide                         |                                          |                                       |
| Q5FIJ0                                         | LBA1672           | PF00497          | amino acid<br>(glutamine/glutamate/aspartate?) |                                          |                                       |
| Q5FK82                                         | LBA1046           | PF00497          | amino acid<br>(glutamine/glutamate/aspartate?) |                                          |                                       |
| Q5FJ99                                         | LBA1400           | PF00496          | dipeptide/oligopeptide                         |                                          |                                       |
| Q5FJ23                                         | LBA1481           | PF13407          | xylose                                         |                                          |                                       |
| Q5FI94                                         | LBA1773           | PF01297          | manganese/zinc ion                             |                                          |                                       |
| Q5FJJ4                                         | LBA1300           | PF00496          | dipeptide/oligopeptide                         |                                          |                                       |
| Q5FLF9                                         | LBA0585           | PF13416          | sugar                                          |                                          |                                       |
| Q5FJA4                                         | LBA1395           | PF03180          | methionine                                     |                                          |                                       |
| G1UB60                                         | LBA0502           | PF13416          | sugar                                          |                                          |                                       |
| Q5FHT6                                         | LBA1943           | PF02608          | sugar                                          |                                          |                                       |

| Q5FIJ7                                       | LBA1665    | PF00496   | oligopeptide                                   |                                   |                                |
|----------------------------------------------|------------|-----------|------------------------------------------------|-----------------------------------|--------------------------------|
| Q5FHT7                                       | LBA1942    | PF02608   | sugar                                          |                                   |                                |
| Q5FJS3                                       | LBA1216    | PF00496   | oligopeptide                                   |                                   |                                |
| Q5FMI2                                       | LBA0197    | PF00496   | oligopeptide                                   |                                   |                                |
| Q5FLG4                                       | LBA0579    | PF00497   | amino acid<br>(glutamine/glutamate/aspartate?) |                                   |                                |
| Q5FJF1                                       | LBA1346    | PF00496   | oligopeptide                                   |                                   |                                |
| Q5FIM1                                       | LBA1641    | PF13416   | sugar                                          |                                   |                                |
| Q5FLH1                                       | LBA0572    | PF00497   | amino acid<br>(glutamine/glutamate/aspartate?) |                                   |                                |
| Q5FM21                                       | LBA0361    | PF12849   | phosphate                                      |                                   |                                |
| Q5FHR9                                       | LBA1961    | PF00496   | oligopeptide                                   |                                   |                                |
| Q5FMX1                                       | LBA0049    | PF04392   | Unclassified                                   |                                   |                                |
| Q5FL38                                       | LBA0713    | PF13416   | spermidine/putrescine                          |                                   |                                |
| Q5FMI1                                       | LBA0198    | PF00496   | oligopeptide                                   |                                   |                                |
| Q5FJF0                                       | LBA1347    | PF00496   | oligopeptide                                   |                                   |                                |
|                                              |            |           |                                                |                                   |                                |
| <b><i>Spirochaeta thermophila</i> Z-1203</b> |            |           |                                                |                                   |                                |
| Number of ORFs in the proteome: 2249         |            |           |                                                |                                   |                                |
| Number of SBPs: 41 (1.82% of total)          |            |           |                                                |                                   |                                |
| Lifestyle Summary: FRESH/MARINE WATERS       |            |           |                                                |                                   |                                |
| SeqID                                        | Gene Locus | Pfam Code | Ligand prediction by TransportDB               | Experimentally identified ligands | References/pdb accession codes |
| G0GDU0                                       | Spith_1962 | PF09084   | nitrate/sulfonate/taurine                      |                                   |                                |
| G0GDC0                                       | Spith_0260 | PF00496   | oligopeptide                                   |                                   |                                |
| G0GFS0                                       | Spith_1349 | PF13416   | sugar                                          |                                   |                                |
| G0GAA3                                       | Spith_0660 | PF01547   | sugar                                          |                                   |                                |
| G0GC43                                       | Spith_0120 | PF13458   | leucine/valine                                 |                                   |                                |
| G0GEZ5                                       | Spith_2083 | PF03480   | C4-dicarboxylate                               |                                   |                                |
| G0GB12                                       | Spith_0760 | PF00496   | dipeptide/oligopeptide                         |                                   |                                |
| G0GAT4                                       | Spith_1569 | PF01547   | sugar                                          |                                   |                                |
| G0GF74                                       | Spith_0493 | PF04069   | glycine betaine                                |                                   |                                |
| G0GDT6                                       | Spith_1958 | PF02608   | sugar                                          |                                   |                                |

|                                             |            |         |                        |  |  |
|---------------------------------------------|------------|---------|------------------------|--|--|
| G0GA73                                      | Spith_0629 | PF03401 | tricarboxylate         |  |  |
| G0GDR0                                      | Spith_1932 | PF13416 | sugar                  |  |  |
| G0GFK0                                      | Spith_2144 | PF03480 | C4-dicarboxylate       |  |  |
| G0GF11                                      | Spith_2099 | PF13407 | rhamnose               |  |  |
| G0GDA3                                      | Spith_0243 | PF01547 | sugar                  |  |  |
| G0GEJ2                                      | Spith_0396 | PF01547 | sugar                  |  |  |
| G0GBA3                                      | Spith_1651 | PF03480 | C4-dicarboxylate       |  |  |
| G0GA25                                      | Spith_1449 | PF01547 | sugar                  |  |  |
| G0GDW1                                      | Spith_0307 | PF13407 | xylose                 |  |  |
| G0GAH2                                      | Spith_1529 | PF01547 | sugar                  |  |  |
| G0GEM1                                      | Spith_0425 | PF13407 | rhamnose               |  |  |
| G0GBZ2                                      | Spith_1743 | PF01547 | sugar                  |  |  |
| G0GAD1                                      | Spith_1487 | PF03480 | C4-dicarboxylate       |  |  |
| G0GDR9                                      | Spith_1941 | PF00496 | oligopeptide           |  |  |
| G0GF15                                      | Spith_2103 | PF01547 | sugar                  |  |  |
| G0GFK9                                      | Spith_2153 | PF01497 | iron-hydroxamate       |  |  |
| G0GDT1                                      | Spith_1953 | PF13458 | leucine/valine         |  |  |
| G0GD79                                      | Spith_1896 | PF13416 | sugar                  |  |  |
| G0GA78                                      | Spith_0634 | PF01297 | zinc                   |  |  |
| G0GFH4                                      | Spith_1323 | PF01547 | sugar                  |  |  |
| G0GA71                                      | Spith_0627 | PF03480 | C4-dicarboxylate       |  |  |
| G0GFR0                                      | Spith_1339 | PF13407 | rhamnose               |  |  |
| G0GD21                                      | Spith_1041 | PF13416 | sugar (maltose?)       |  |  |
| G0GEI1                                      | Spith_0384 | PF03480 | C4-dicarboxylate       |  |  |
| G0G9T2                                      | Spith_0552 | PF12849 | phosphate              |  |  |
| G0GCJ3                                      | Spith_1800 | PF00496 | dipeptide/oligopeptide |  |  |
| G0GF63                                      | Spith_0482 | PF13416 | sugar                  |  |  |
| G0GE23                                      | Spith_0370 | PF01547 | sugar                  |  |  |
| G0GAN1                                      | Spith_0717 | PF01547 | sugar                  |  |  |
| G0GBK3                                      | Spith_0075 | PF01547 | sugar                  |  |  |
| G0GD29                                      | Spith_1845 | PF02608 | sugar                  |  |  |
|                                             |            |         |                        |  |  |
|                                             |            |         |                        |  |  |
| <b><i>Azospirillum brasilense</i> Sp245</b> |            |         |                        |  |  |

| Number of ORFs in the proteome: 7541           |                |           |                                                |                                   |                                |
|------------------------------------------------|----------------|-----------|------------------------------------------------|-----------------------------------|--------------------------------|
| Number of SBPs: 161 (2.13% of total)           |                |           |                                                |                                   |                                |
| Lifestyle Summary: BENEFICIAL PLANT ASSOCIATED |                |           |                                                |                                   |                                |
| SeqID                                          | Gene Locus     | Pfam Code | Ligand prediction by TransportDB               | Experimentally identified ligands | References/pdb accession codes |
| G8AWV9                                         | AZOBR_p310110  | PF13458   | leucine/valine                                 |                                   |                                |
| G8AKQ3                                         | AZOBR_100201   | PF02608   | sugar                                          |                                   |                                |
| G8ATS3                                         | AZOBR_p1130057 | PF03480   | C4-dicarboxylate                               |                                   |                                |
| G8AQ61                                         | AZOBR_p110048  | PF00496   | oligopeptide                                   |                                   |                                |
| G8AUW6                                         | AZOBR_p230066  | PF00496   | dipeptide/oligopeptide                         |                                   |                                |
| G8AX81                                         | AZOBR_p310232  | PF13416   | 2-aminoethylphosphonate                        |                                   |                                |
| G8AFZ2                                         | AZOBR_180217   | PF13458   | leucine/valine                                 |                                   |                                |
| G8AYT0                                         | AZOBR_p410007  | PF13458   | leucine/valine                                 |                                   |                                |
| G8B019                                         | AZOBR_p460039  | PF03480   | C4-dicarboxylate                               |                                   |                                |
| G8AGP3                                         | AZOBR_180300   | PF09084   | nitrate/sulfonate/taurine                      |                                   |                                |
| G8AQZ2                                         | AZOBR_p130041  | PF04069   | glycine betaine                                |                                   |                                |
| G8AZU1                                         | AZOBR_p440163  | PF13407   | xylose                                         |                                   |                                |
| G8AYW5                                         | AZOBR_p410042  | PF01497   | iron-hydroxamate                               |                                   |                                |
| G8AWS4                                         | AZOBR_p310075  | PF00497   | amino acid<br>(glutamine/glutamate/aspartate?) |                                   |                                |
| G8AVY5                                         | AZOBR_p270290  | PF03480   | C4-dicarboxylate                               |                                   |                                |
| G8ATU5                                         | AZOBR_p210018  | PF13458   | urea                                           |                                   |                                |
| G8AIN1                                         | AZOBR_40262    | PF00496   | oligopeptide                                   |                                   |                                |
| G8AR13                                         | AZOBR_p130062  | PF04392   | Unclassified                                   |                                   |                                |
| G8AEG0                                         | AZOBR_10106    | PF00497   | amino acid<br>(glutamine/glutamate/aspartate?) |                                   |                                |
| G8AGU1                                         | AZOBR_190023   | PF13458   | leucine/valine                                 |                                   |                                |
| G8AXV7                                         | AZOBR_p330117  | PF01297   | zinc                                           |                                   |                                |
| G8AZX8                                         | AZOBR_p450012  | PF03480   | C4-dicarboxylate                               |                                   |                                |
| G8AQV9                                         | AZOBR_p130008  | PF13458   | leucine/valine                                 |                                   |                                |
| G8AFF2                                         | AZOBR_10288    | PF00496   | oligopeptide                                   |                                   |                                |
| G8ASH5                                         | AZOBR_p170142  | PF09084   | glycine betaine                                |                                   |                                |
| G8AXB6                                         | AZOBR_p310267  | PF09084   | nitrate/sulfonate/taurine                      |                                   |                                |

|        |               |         |                           |  |  |
|--------|---------------|---------|---------------------------|--|--|
| G8AXU2 | AZOBR_p330102 | PF01547 | sugar                     |  |  |
| G8AF88 | AZOBR_10224   | PF01297 | zinc                      |  |  |
| G8AX46 | AZOBR_p310197 | PF13458 | urea                      |  |  |
| G8AVD6 | AZOBR_p270091 | PF13458 | leucine/valine            |  |  |
| G8AXK5 | AZOBR_p330015 | PF09084 | nitrate/sulfonate/taurine |  |  |
| G8AUJ9 | AZOBR_p220071 | PF03480 | C4-dicarboxylate          |  |  |
| G8AWU7 | AZOBR_p310098 | PF13458 | leucine/valine            |  |  |
| G8AWX6 | AZOBR_p310127 | PF03480 | C4-dicarboxylate          |  |  |
| G8ALR6 | AZOBR_120022  | PF16868 | phosphonates              |  |  |
| G8AWG2 | AZOBR_p350061 | PF00496 | dipeptide/oligopeptide    |  |  |
| G8AX64 | AZOBR_p310215 | PF13458 | urea                      |  |  |
| G8B0K8 | AZOBR_p480032 | PF13458 | leucine/valine            |  |  |
| G8AXQ9 | AZOBR_p330069 | PF13416 | 2-aminoethylphosphonate   |  |  |
| G8AFE0 | AZOBR_10276   | PF13416 | spermidine/putrescine     |  |  |
| G8AZA8 | AZOBR_p430046 | PF00496 | dipeptide/oligopeptide    |  |  |
| G8AVV9 | AZOBR_p270264 | PF00496 | dipeptide/oligopeptide    |  |  |
| G8AH75 | AZOBR_30007   | PF00496 | dipeptide/oligopeptide    |  |  |
| G8AJB8 | AZOBR_50054   | PF00496 | dipeptide/oligopeptide    |  |  |
| G8B005 | AZOBR_p460025 | PF00496 | dipeptide/oligopeptide    |  |  |
| G8AVY9 | AZOBR_p270294 | PF03180 | methionine                |  |  |
| G8AJE0 | AZOBR_60013   | PF13458 | urea                      |  |  |
| G8B091 | AZOBR_p470016 | PF02608 | sugar                     |  |  |
| G8AUA9 | AZOBR_p210182 | PF00496 | dipeptide/oligopeptide    |  |  |
| G8AZT6 | AZOBR_p440158 | PF13407 | ribose                    |  |  |
| G8AET0 | AZOBR_160063  | PF09084 | phosphonates              |  |  |
| G8AZI8 | AZOBR_p440060 | PF13416 | spermidine/putrescine     |  |  |
| G8AGD9 | AZOBR_10461   | PF13458 | leucine/valine            |  |  |
| G8AXS9 | AZOBR_p330089 | PF13407 | xylose                    |  |  |
| G8B0I0 | AZOBR_p480004 | PF13458 | urea                      |  |  |
| G8AGP9 | AZOBR_180306  | PF09084 | nitrate/sulfonate/taurine |  |  |
| G8AFY1 | AZOBR_180206  | PF09084 | nitrate/sulfonate/taurine |  |  |
| G8AED5 | AZOBR_10081   | PF09084 | nitrate/sulfonate/taurine |  |  |
| G8AZQ0 | AZOBR_p440122 | PF02608 | sugar                     |  |  |

|        |                |         |                                                |  |  |
|--------|----------------|---------|------------------------------------------------|--|--|
| G8AY75 | AZOBR_p340072  | PF13458 | leucine/valine                                 |  |  |
| G8AY06 | AZOBR_p340003  | PF05048 | Not annotated in TransportDB                   |  |  |
| G8AYS1 | AZOBR_p350046  | PF01497 | iron-hydroxamate                               |  |  |
| G8AWP9 | AZOBR_p310050  | PF13416 | 2-aminoethylphosphonate                        |  |  |
| G8AG29 | AZOBR_10351    | PF01297 | zinc                                           |  |  |
| G8AE60 | AZOBR_10006    | PF13416 | sugar                                          |  |  |
| G8ASZ6 | AZOBR_p1110021 | PF09084 | phosphonates                                   |  |  |
| G8AKI8 | AZOBR_100136   | PF13458 | leucine/valine                                 |  |  |
| G8ARP0 | AZOBR_p140067  | PF13458 | leucine/valine                                 |  |  |
| G8AX92 | AZOBR_p310243  | PF00497 | amino acid<br>(glutamine/glutamate/aspartate?) |  |  |
| G8AVW3 | AZOBR_p270268  | PF09084 | nitrate/sulfonate/taurine                      |  |  |
| G8AUH6 | AZOBR_p220048  | PF03401 | tricarboxylate                                 |  |  |
| G8AEU5 | AZOBR_160078   | PF09084 | nitrate/sulfonate/taurine                      |  |  |
| G8ATJ3 | AZOBR_p1120052 | PF13416 | spermidine/putrescine                          |  |  |
| G8AGA7 | AZOBR_10429    | PF00496 | dipeptide/oligopeptide                         |  |  |
| G8AW03 | AZOBR_p270308  | PF13458 | urea                                           |  |  |
| G8AGF3 | AZOBR_10475    | PF13458 | leucine/valine                                 |  |  |
| G8ASM7 | AZOBR_p1100004 | PF00497 | amino acid<br>(glutamine/glutamate/aspartate?) |  |  |
| G8AMV1 | AZOBR_140293   | PF00497 | amino acid<br>(glutamine/glutamate/aspartate?) |  |  |
| G8ATF2 | AZOBR_p1120011 | PF03180 | methionine                                     |  |  |
| G8AIN2 | AZOBR_40263    | PF00496 | oligopeptide                                   |  |  |
| G8AHZ4 | AZOBR_40066    | PF13458 | branched-chain amino acid                      |  |  |
| G8ATA1 | AZOBR_p1110126 | PF03480 | C4-dicarboxylate                               |  |  |
| G8AWZ6 | AZOBR_p310147  | PF00496 | dipeptide/oligopeptide                         |  |  |
| G8ASL0 | AZOBR_p180016  | PF01547 | sugar                                          |  |  |
| G8AH04 | AZOBR_10510    | PF00496 | dipeptide/oligopeptide                         |  |  |
| G8AYR7 | AZOBR_p350042  | PF09084 | phosphonates                                   |  |  |
| G8AME3 | AZOBR_140135   | PF00497 | Unclassified                                   |  |  |
| G8ATF7 | AZOBR_p1120016 | PF03180 | methionine                                     |  |  |
| G8AP88 | AZOBR_p1140076 | PF13458 | urea                                           |  |  |

|        |                |         |                                                |  |  |
|--------|----------------|---------|------------------------------------------------|--|--|
| G8AUJ5 | AZOBR_p220067  | PF04392 | trimethylamine N-oxide                         |  |  |
| G8AWN9 | AZOBR_p310040  | PF00496 | dipeptide/oligopeptide                         |  |  |
| G8ALX7 | AZOBR_130017   | PF13416 | spermidine/putrescine                          |  |  |
| G8AEZ0 | AZOBR_180033   | PF00497 | amino acid<br>(glutamine/glutamate/aspartate?) |  |  |
| G8AFB0 | AZOBR_10246    | PF12849 | phosphate                                      |  |  |
| G8AME8 | AZOBR_140140   | PF03480 | C4-dicarboxylate                               |  |  |
| G8AQZ6 | AZOBR_p130045  | PF13416 | spermidine/putrescine                          |  |  |
| G8AQX3 | AZOBR_p130022  | PF00497 | amino acid<br>(glutamine/glutamate/aspartate?) |  |  |
| G8AIV8 | AZOBR_40339    | PF13458 | urea                                           |  |  |
| G8AL55 | AZOBR_100353   | PF09084 | nitrate/sulfonate/taurine                      |  |  |
| G8AYL9 | AZOBR_p340216  | PF13458 | urea                                           |  |  |
| G8AJB5 | AZOBR_50051    | PF00497 | amino acid<br>(glutamine/glutamate/aspartate?) |  |  |
| G8AVV0 | AZOBR_p270255  | PF03401 | tricarboxylate                                 |  |  |
| G8AXA0 | AZOBR_p310251  | PF03480 | C4-dicarboxylate                               |  |  |
| G8AH97 | AZOBR_30029    | PF03480 | C4-dicarboxylate                               |  |  |
| G8AZ35 | AZOBR_p420006  | PF03480 | C4-dicarboxylate                               |  |  |
| G8AXV4 | AZOBR_p330114  | PF01297 | zinc                                           |  |  |
| G8AWT2 | AZOBR_p310083  | PF03480 | C4-dicarboxylate                               |  |  |
| G8AUC1 | AZOBR_p210194  | PF03480 | C4-dicarboxylate                               |  |  |
| G8ATP0 | AZOBR_p1130024 | PF03480 | C4-dicarboxylate                               |  |  |
| G8AQ83 | AZOBR_p110070  | PF03480 | C4-dicarboxylate                               |  |  |
| G8AQ63 | AZOBR_p110050  | PF03480 | C4-dicarboxylate                               |  |  |
| G8AU30 | AZOBR_p210103  | PF00497 | amino acid<br>(glutamine/glutamate/aspartate?) |  |  |
| G8AUV1 | AZOBR_p230051  | PF03480 | C4-dicarboxylate                               |  |  |
| G8B0L8 | AZOBR_p480042  | PF03401 | tricarboxylate                                 |  |  |
| G8AU43 | AZOBR_p210116  | PF03401 | tricarboxylate                                 |  |  |
| G8AU42 | AZOBR_p210115  | PF03401 | tricarboxylate                                 |  |  |
| G8AE82 | AZOBR_10028    | PF03401 | tricarboxylate                                 |  |  |
| G8AJ65 | AZOBR_50001    | PF03480 | C4-dicarboxylate                               |  |  |



|        |               |         |                                                |  |  |
|--------|---------------|---------|------------------------------------------------|--|--|
| G8AXL6 | AZOBR_p330026 | PF09084 | nitrate/sulfonate/taurine                      |  |  |
| G8AUH7 | AZOBR_p220049 | PF03401 | tricarboxylate                                 |  |  |
| G8AM55 | AZOBR_140047  | PF00497 | amino acid<br>(glutamine/glutamate/aspartate?) |  |  |
| G8AKE7 | AZOBR_100095  | PF04392 | Unclassified                                   |  |  |
| G8AE80 | AZOBR_10026   | PF03401 | tricarboxylate                                 |  |  |
| G8ASG1 | AZOBR_p170128 | PF01497 | iron-hydroxamate                               |  |  |
| G8AGN3 | AZOBR_180290  | PF09084 | nitrate/sulfonate/taurine                      |  |  |
| G8AVU2 | AZOBR_p270247 | PF09084 | nitrate/sulfonate/taurine                      |  |  |
| G8AKH6 | AZOBR_100124  | PF02608 | sugar                                          |  |  |
| G8AUI6 | AZOBR_p220058 | PF01497 | iron-hydroxamate                               |  |  |
| G8AWJ7 | AZOBR_p360005 | PF00497 | amino acid<br>(glutamine/glutamate/aspartate?) |  |  |
| G8AZR0 | AZOBR_p440132 | PF02608 | sugar                                          |  |  |
| G8AV11 | AZOBR_p250011 | PF13416 | spermidine/putrescine                          |  |  |
| G8ARK0 | AZOBR_p140027 | PF13458 | urea                                           |  |  |
| G8AEJ5 | AZOBR_10141   | PF00497 | amino acid<br>(glutamine/glutamate/aspartate?) |  |  |
| G8AEQ6 | AZOBR_160039  | PF13458 | urea                                           |  |  |
| G8AX77 | AZOBR_p310228 | PF00497 | amino acid<br>(glutamine/glutamate/aspartate?) |  |  |
| G8AZP1 | AZOBR_p440113 | PF00496 | dipeptide/oligopeptide                         |  |  |
| G8AR24 | AZOBR_p130073 | PF03480 | C4-dicarboxylate                               |  |  |
| G8AUM2 | AZOBR_p220094 | PF00497 | amino acid<br>(glutamine/glutamate/aspartate?) |  |  |
| G8AZZ0 | AZOBR_p460010 | PF03401 | tricarboxylate                                 |  |  |
| G8AU31 | AZOBR_p210104 | PF00497 | amino acid<br>(glutamine/glutamate/aspartate?) |  |  |
| G8AUL0 | AZOBR_p220082 | PF04069 | glycine betaine                                |  |  |
| G8ALT4 | AZOBR_120040  | PF00497 | amino acid<br>(glutamine/glutamate/aspartate?) |  |  |
| G8AJ39 | AZOBR_40420   | PF00497 | amino acid<br>(glutamine/glutamate/aspartate?) |  |  |

| G8AT82                                             | AZOBR_p1110107 | PF01497   | iron-hydroxamate                               |                                   |                                |
|----------------------------------------------------|----------------|-----------|------------------------------------------------|-----------------------------------|--------------------------------|
| G8AT72                                             | AZOBR_p1110097 | PF01497   | iron-hydroxamate                               |                                   |                                |
| G8AX23                                             | AZOBR_p310174  | PF13458   | urea                                           |                                   |                                |
| G8APA0                                             | AZOBR_p1140088 | PF09084   | nitrate/sulfonate/taurine                      |                                   |                                |
| G8ARG2                                             | AZOBR_p130211  | PF16868   | phosphonate                                    |                                   |                                |
| G8AIJ7                                             | AZOBR_40228    | PF00496   | dipeptide/oligopeptide                         |                                   |                                |
| G8ASK6                                             | AZOBR_p180012  | PF01547   | sugar                                          |                                   |                                |
| G8ASI9                                             | AZOBR_p170156  | PF00497   | amino acid<br>(glutamine/glutamate/aspartate?) |                                   |                                |
| G8AJJ8                                             | AZOBR_70046    | PF12849   | 2-aminoethylphosphonate                        |                                   |                                |
| G8AIL9                                             | AZOBR_40250    | PF16868   | glycine betaine                                |                                   |                                |
| G8AVT9                                             | AZOBR_p270244  | PF09084   | glycine betaine                                |                                   |                                |
| G8AW38                                             | AZOBR_p280033  | PF13458   | leucine/valine                                 |                                   |                                |
| G8AVT4                                             | AZOBR_p270239  | PF09084   | nitrate/sulfonate/taurine                      |                                   |                                |
| G8AR79                                             | AZOBR_p130128  | PF03480   | C4-dicarboxylate                               |                                   |                                |
| G8APQ4                                             | AZOBR_p1170023 | PF00496   | dipeptide/oligopeptide                         |                                   |                                |
| G8ALJ3                                             | AZOBR_110079   | PF13458   | leucine/valine                                 |                                   |                                |
| G8AW23                                             | AZOBR_p280018  | PF01547   | sugar                                          |                                   |                                |
| G8AXQ0                                             | AZOBR_p330060  | PF09084   | phosphonates                                   |                                   |                                |
|                                                    |                |           |                                                |                                   |                                |
| <b><i>Pectobacterium atrosepticum</i> SCRI1043</b> |                |           |                                                |                                   |                                |
| Number of ORFs in the proteome: 4459               |                |           |                                                |                                   |                                |
| Number of SBPs: 85 (1.91% of total)                |                |           |                                                |                                   |                                |
| Lifestyle Summary: PLANT PATHOGEN                  |                |           |                                                |                                   |                                |
| SeqID                                              | Gene Locus     | Pfam Code | Ligand prediction by TransportDB               | Experimentally identified ligands | References/pdb accession codes |
| Q6CZ31                                             | ECA4322        | PF13416   | sugar                                          |                                   |                                |
| Q6D1Z3                                             | ECA3304        | PF01497   | iron-hydroxamate                               |                                   |                                |
| Q6D3B0                                             | ECA2834        | PF00496   | dipeptide/oligopeptide                         |                                   |                                |
| Q6CZA4                                             | ECA4249        | PF13416   | spermidine/putrescine                          |                                   |                                |
| Q6D1F3                                             | ECA3495        | PF00497   | amino acid<br>(glutamine/glutamate/aspartate?) |                                   |                                |
| Q6D5A6                                             | ECA2134        | PF13416   | 2-aminoethylphosphonate                        |                                   |                                |

|        |         |         |                                                |  |  |
|--------|---------|---------|------------------------------------------------|--|--|
| Q6DA98 | ECA0357 | PF03480 | C4-dicarboxylate                               |  |  |
| Q6D430 | ECA2564 | PF01497 | iron-hydroxamate                               |  |  |
| Q6D1C2 | ECA3526 | PF03180 | methionine                                     |  |  |
| Q6CYW1 | ECA4394 | PF00496 | dipeptide/oligopeptide                         |  |  |
| Q6D4A9 | ECA2484 | PF01297 | zinc ion                                       |  |  |
| Q6D5R3 | ECA1977 | PF00496 | oligopeptide                                   |  |  |
| Q6D3K8 | ECA2736 | PF00496 | oligopeptide                                   |  |  |
| Q6D3Q5 | ECA2689 | PF03180 | methionine                                     |  |  |
| Q6D4G1 | ECA2429 | PF13416 | sugar                                          |  |  |
| Q6D6Y0 | ECA1549 | PF00496 | dipeptide/oligopeptide                         |  |  |
| Q6D2X8 | ECA2966 | PF00497 | amino acid<br>(glutamine/glutamate/aspartate?) |  |  |
| Q6D250 | ECA3246 | PF01497 | iron-hydroxamate                               |  |  |
| Q6D1Y6 | ECA3311 | PF01497 | iron-hydroxamate                               |  |  |
| Q6CZ98 | ECA4255 | PF01497 | cobalamin                                      |  |  |
| Q6D3D5 | ECA2809 | PF01497 | iron-hydroxamate                               |  |  |
| Q6D1B1 | ECA3537 | PF00497 | amino acid<br>(glutamine/glutamate/aspartate?) |  |  |
| Q6D701 | ECA1528 | PF04069 | glycine betaine                                |  |  |
| Q6D583 | ECA2157 | PF00497 | amino acid<br>(glutamine/glutamate/aspartate?) |  |  |
| Q6CZS5 | ECA4076 | PF00496 | dipeptide/oligopeptide                         |  |  |
| Q6D8X3 | ECA0848 | PF13416 | sugar                                          |  |  |
| Q6DB26 | ECA0075 | PF00496 | dipeptide/oligopeptide                         |  |  |
| Q6D898 | ECA1076 | PF01497 | iron-hydroxamate                               |  |  |
| Q6D6X1 | ECA1558 | PF09084 | phosphonates                                   |  |  |
| Q6D532 | ECA2210 | PF13416 | sugar                                          |  |  |
| Q6D7L1 | ECA1314 | PF00497 | amino acid<br>(glutamine/glutamate/aspartate?) |  |  |
| Q6D8W5 | ECA0856 | PF00497 | amino acid<br>(glutamine/glutamate/aspartate?) |  |  |
| Q6D4W7 | ECA2273 | PF00532 | ribose                                         |  |  |

|        |         |         |                                                |  |  |
|--------|---------|---------|------------------------------------------------|--|--|
| Q6D3H6 | ECA2768 | PF00497 | amino acid<br>(glutamine/glutamate/aspartate?) |  |  |
| Q6D584 | ECA2156 | PF00497 | amino acid<br>(glutamine/glutamate/aspartate?) |  |  |
| Q6D8G6 | ECA1008 | PF00496 | dipeptide/oligopeptide                         |  |  |
| Q6DAK8 | ECA0245 | PF00497 | amino acid<br>(glutamine/glutamate/aspartate?) |  |  |
| Q6D2J9 | ECA3096 | PF01497 | iron-hydroxamate                               |  |  |
| Q6D0P7 | ECA3751 | PF13416 | sugar                                          |  |  |
| Q6D3S6 | ECA2668 | PF00497 | amino acid<br>(glutamine/glutamate/aspartate?) |  |  |
| Q6D5U6 | ECA1942 | PF00496 | oligopeptide                                   |  |  |
| Q6CZ52 | ECA4301 | PF09084 | nitrate/sulfonate/taurine                      |  |  |
| Q6CZB7 | ECA4236 | PF13407 | xylose                                         |  |  |
| Q6D643 | ECA1845 | PF01497 | iron-hydroxamate                               |  |  |
| Q6CZF7 | ECA4195 | PF00497 | amino acid<br>(glutamine/glutamate/aspartate?) |  |  |
| Q6D728 | ECA1498 | PF03180 | methionine                                     |  |  |
| Q6D3E3 | ECA2801 | PF00496 | dipeptide/oligopeptide                         |  |  |
| Q6D8Z3 | ECA0828 | PF00497 | amino acid<br>(glutamine/glutamate/aspartate?) |  |  |
| Q6D3S3 | ECA2671 | PF00497 | amino acid<br>(glutamine/glutamate/aspartate?) |  |  |
| Q6DAW5 | ECA0137 | PF00496 | dipeptide/oligopeptide                         |  |  |
| Q6D4D9 | ECA2453 | PF13416 | spermidine/putrescine                          |  |  |
| Q6D967 | ECA0752 | PF13416 | sugar                                          |  |  |
| Q6D5H4 | ECA2066 | PF03180 | methionine                                     |  |  |
| Q6CZP1 | ECA4110 | PF01497 | iron-hydroxamate                               |  |  |
| Q6D184 | ECA3564 | PF01497 | iron-hydroxamate                               |  |  |
| Q6D5X6 | ECA1912 | PF09084 | nitrate/sulfonate/taurine                      |  |  |
| Q6D4R6 | ECA2324 | PF00496 | oligopeptide                                   |  |  |
| Q6CYL8 | ECA4489 | PF00497 | amino acid<br>(glutamine/glutamate/aspartate?) |  |  |

|                                                |         |         |                                                |  |  |
|------------------------------------------------|---------|---------|------------------------------------------------|--|--|
| Q6DB85                                         | ECA0013 | PF13407 | ribose                                         |  |  |
| Q6D4I4                                         | ECA2406 | PF01547 | sugar                                          |  |  |
| Q6D2P5                                         | ECA3050 | PF00497 | amino acid<br>(glutamine/glutamate/aspartate?) |  |  |
| Q6D4R5                                         | ECA2325 | PF00496 | oligopeptide                                   |  |  |
| Q6CZR6                                         | ECA4085 | PF00497 | amino acid<br>(glutamine/glutamate/aspartate?) |  |  |
| Q6D863                                         | ECA1112 | PF12849 | phosphate                                      |  |  |
| Q6DB04                                         | ECA0098 | PF13407 | xylose                                         |  |  |
| Q6D766                                         | ECA1459 | PF13407 | xylose                                         |  |  |
| Q6CYN7                                         | ECA4470 | PF00497 | amino acid<br>(glutamine/glutamate/aspartate?) |  |  |
| Q6D197                                         | ECA3551 | PF13416 | sugar                                          |  |  |
| Q6D2Y1                                         | ECA2963 | PF00496 | dipeptide/oligopeptide                         |  |  |
| Q6DAD2                                         | ECA0322 | PF04348 | leucine/valine                                 |  |  |
| Q6CYU5                                         | ECA4410 | PF09084 | nitrate/sulfonate/taurine                      |  |  |
| Q6D7C0                                         | ECA1405 | PF13407 | ribose                                         |  |  |
| Q6D5P9                                         | ECA1992 | PF00496 | oligopeptide                                   |  |  |
| Q6D5I5                                         | ECA2055 | PF13416 | spermidine/putrescine                          |  |  |
| Q6DA15                                         | ECA0448 | PF00496 | dipeptide/oligopeptide                         |  |  |
| Q6D0P0                                         | ECA3758 | PF01297 | manganese/zinc ion                             |  |  |
| Q6D4J8                                         | ECA2392 | PF01297 | manganese/zinc ion                             |  |  |
| Q6D3R7                                         | ECA2677 | PF13416 | spermidine/putrescine                          |  |  |
| Q6D2C1                                         | ECA3175 | PF13416 | sugar (maltose?)                               |  |  |
| Q6D255                                         | ECA3241 | PF01497 | iron-hydroxamate                               |  |  |
| Q6CYS9                                         | ECA4426 | PF00496 | dipeptide/oligopeptide                         |  |  |
| Q6DAK6                                         | ECA0247 | PF00497 | amino acid<br>(glutamine/glutamate/aspartate?) |  |  |
| Q6CZ12                                         | ECA4341 | PF13458 | leucine/valine                                 |  |  |
| Q6D1E4                                         | ECA3504 | PF04069 | glycine betaine                                |  |  |
| Q6CYN0                                         | ECA4477 | PF12849 | phosphate                                      |  |  |
|                                                |         |         |                                                |  |  |
| <b><i>Bdellovibrio bacteriovorus</i> HD100</b> |         |         |                                                |  |  |

| Number of ORFs in the proteome: 3583 |            |           |                                                |                                   |                                |
|--------------------------------------|------------|-----------|------------------------------------------------|-----------------------------------|--------------------------------|
| Number of SBPs: 42 (1.17% of total)  |            |           |                                                |                                   |                                |
| Lifestyle Summary: SOIL              |            |           |                                                |                                   |                                |
| SeqID                                | Gene Locus | Pfam Code | Ligand prediction by TransportDB               | Experimentally identified ligands | References/pdb accession codes |
| Q6MM71                               | Bd1771     | PF00497   | amino acid<br>(glutamine/glutamate/aspartate?) |                                   |                                |
| Q6MHH1                               | Bd3573     | PF00497   | amino acid<br>(glutamine/glutamate/aspartate?) |                                   |                                |
| Q6MHZ9                               | Bd3385     | PF13458   | leucine/valine                                 |                                   |                                |
| Q6MN45                               | Bd1418     | PF13416   | spermidine/putrescine                          |                                   |                                |
| Q6MJC6                               | Bd2855     | PF00497   | amino acid<br>(glutamine/glutamate/aspartate?) |                                   |                                |
| Q6MJQ5                               | Bd2714     | PF13407   | rhamnose                                       |                                   |                                |
| Q6MQM0                               | Bd0445     | PF02608   | sugar                                          |                                   |                                |
| Q6MP13                               | Bd1057     | PF00497   | amino acid<br>(glutamine/glutamate/aspartate?) |                                   |                                |
| Q6MJA4                               | Bd2877     | PF00497   | amino acid<br>(glutamine/glutamate/aspartate?) |                                   |                                |
| Q6MPM3                               | Bd0825     | PF00497   | amino acid<br>(glutamine/glutamate/aspartate?) |                                   |                                |
| Q6MQU9                               | Bd0357     | PF00496   | dipeptide/oligopeptide                         |                                   |                                |
| Q6MQ83                               | Bd0597     | PF00497   | amino acid<br>(glutamine/glutamate/aspartate?) |                                   |                                |
| Q6MKE6                               | Bd2450     | PF00497   | amino acid<br>(glutamine/glutamate/aspartate?) |                                   |                                |
| Q6ML31                               | Bd2191     | PF00496   | dipeptide/oligopeptide                         |                                   |                                |
| Q6MN34                               | Bd1429     | PF00497   | amino acid<br>(glutamine/glutamate/aspartate?) |                                   |                                |
| Q6MLN5                               | Bd1972     | PF00496   | oligopeptide                                   |                                   |                                |
| Q6MNL1                               | Bd1237     | PF00497   | amino acid<br>(glutamine/glutamate/aspartate?) |                                   |                                |
| Q6MLI9                               | Bd2020     | PF09084   | nitrate/sulfonate/taurine                      |                                   |                                |

|        |        |         |                                                |  |  |
|--------|--------|---------|------------------------------------------------|--|--|
| Q6MH17 | Bd3555 | PF00497 | amino acid<br>(glutamine/glutamate/aspartate?) |  |  |
| Q6MHV2 | Bd3433 | PF00497 | Not annotated in TransportDB                   |  |  |
| Q6MN84 | Bd1376 | PF13407 | ribose                                         |  |  |
| Q6MR42 | Bd0257 | PF00497 | amino acid<br>(glutamine/glutamate/aspartate?) |  |  |
| Q6MJJ4 | Bd2783 | PF00497 | amino acid<br>(glutamine/glutamate/aspartate?) |  |  |
| Q6MJW5 | Bd2651 | PF00497 | amino acid<br>(glutamine/glutamate/aspartate?) |  |  |
| Q6MPZ9 | Bd0689 | PF00497 | amino acid<br>(glutamine/glutamate/aspartate?) |  |  |
| Q6MM58 | Bd1786 | PF00497 | amino acid<br>(glutamine/glutamate/aspartate?) |  |  |
| Q6MQH8 | Bd0489 | PF00497 | amino acid<br>(glutamine/glutamate/aspartate?) |  |  |
| Q6MI09 | Bd3371 | PF01297 | manganese/zinc ion                             |  |  |
| Q6MLC3 | Bd2089 | PF00497 | amino acid<br>(glutamine/glutamate/aspartate?) |  |  |
| Q6MGQ1 | Bd3873 | PF13458 | leucine/valine                                 |  |  |
| Q6MPR8 | Bd0777 | PF00497 | amino acid<br>(glutamine/glutamate/aspartate?) |  |  |
| Q6MM70 | Bd1773 | PF00497 | amino acid<br>(glutamine/glutamate/aspartate?) |  |  |
| Q6MLH0 | Bd2041 | PF00497 | amino acid<br>(glutamine/glutamate/aspartate?) |  |  |
| Q6MMH3 | Bd1658 | PF12727 | phosphate                                      |  |  |
| Q6MNB1 | Bd1349 | PF00497 | amino acid<br>(glutamine/glutamate/aspartate?) |  |  |
| Q6MPK8 | Bd0844 | PF00497 | Unclassified                                   |  |  |
| Q6MLM0 | Bd1987 | PF00497 | amino acid<br>(glutamine/glutamate/aspartate?) |  |  |

| Q6MQG3                                            | Bd0505     | PF00497   | amino acid<br>(glutamine/glutamate/aspartate?) |                                   |                                                   |
|---------------------------------------------------|------------|-----------|------------------------------------------------|-----------------------------------|---------------------------------------------------|
| Q6MKK3                                            | Bd2385     | PF01497   | iron-hydroxamate                               |                                   |                                                   |
| Q6MPW1                                            | Bd0728     | PF00497   | amino acid<br>(glutamine/glutamate/aspartate?) |                                   |                                                   |
| Q6MQ19                                            | Bd0668     | PF00497   | amino acid<br>(glutamine/glutamate/aspartate?) |                                   |                                                   |
| Q6MHU5                                            | Bd3441     | PF00497   | Unclassified                                   |                                   |                                                   |
| <b><i>Thermotoga maritima</i> MSB8</b>            |            |           |                                                |                                   |                                                   |
| Number of ORFs in the proteome: 1852              |            |           |                                                |                                   |                                                   |
| Number of SBPs: 34 (1.84% of total)               |            |           |                                                |                                   |                                                   |
| Lifestyle Summary: SEDIMENTS (MARINE/FRESH WATER) |            |           |                                                |                                   |                                                   |
| SeqID                                             | Gene Locus | Pfam Code | Ligand prediction by TransportDB               | Experimentally identified ligands | References/pdb accession codes                    |
| Q9WXX7                                            | TM_0123    | PF01297   | zinc                                           |                                   |                                                   |
| Q9WYF8                                            | TM_0322    | PF03480   | C4-dicarboxylate                               |                                   |                                                   |
| Q9WXR2                                            | TM_0056    | PF00496   | dipeptide/oligopeptide                         | Oligopeptides                     | doi: 10.1007/s00792-016-0861-7                    |
| Q9X0K4                                            | TM_1120    | PF13416   | sugar                                          |                                   |                                                   |
| Q9S5Y1                                            | TM_1839    | PF13416   | sugar (maltose?)                               | Maltotetraose, maltotriose        | doi:<br>10.1021/acs.biochem.8b00783;<br>PDB: 2FNC |
| Q9X053                                            | TM_0958    | PF13407   | ribose                                         | Ribose                            | doi: 10.1186/1472-6807-8-50                       |
| Q9WZR7                                            | TM_0810    | PF01547   | sugar                                          |                                   |                                                   |
| Q9X0S6                                            | TM_1199    | PF00496   | dipeptide/oligopeptide                         |                                   |                                                   |
| Q9WZ01                                            | TM_0531    | PF00496   | dipeptide/oligopeptide                         |                                   |                                                   |
| Q9X0N4                                            | TM_1150    | PF00496   | dipeptide/oligopeptide                         |                                   |                                                   |
| Q9WXS6                                            | TM_0071    | PF00496   | dipeptide/oligopeptide                         |                                   |                                                   |



|        |         |         |                                                |                                                                                                            |                                                                                                                          |
|--------|---------|---------|------------------------------------------------|------------------------------------------------------------------------------------------------------------|--------------------------------------------------------------------------------------------------------------------------|
| Q9X0V0 | TM_1223 | PF00496 | dipeptide/oligopeptide                         | Mannobiose, mannohexaose, xylobiose, xylopentaose, laminaribiose, cellobiose, mannopentaose, cellopentaose | doi: 10.1074/jbc.M114.590992                                                                                             |
| Q9WXV7 | TM_0102 | PF02608 | sugar                                          |                                                                                                            |                                                                                                                          |
| Q9WYP9 | TM_0418 | PF01547 | sugar (maltose?)                               |                                                                                                            |                                                                                                                          |
| Q9WYV4 | TM_0484 | PF09084 | nitrate/sulfonate/taurine                      |                                                                                                            |                                                                                                                          |
| Q9WYE5 | TM_0309 | PF00496 | dipeptide/oligopeptide                         |                                                                                                            |                                                                                                                          |
| Q9WZ62 | TM_0593 | PF00497 | amino acid<br>(glutamine/glutamate/aspartate?) | Arginine                                                                                                   | doi:<br>10.1371/journal.pone.0096560;<br>doi:<br>10.1016/j.bbapap.2018.05.016;<br>doi:<br>10.1016/j.ijbiomac.2018.07.172 |
| Q9X0T1 | TM_1204 | PF13416 | sugar (maltose?)                               | Maltotetraose, maltotriose                                                                                 | doi:<br>10.1021/acs.biochem.8b00783;<br>PDB: 2GHA                                                                        |
| Q9WXT5 | TM_0080 | PF01497 | iron-hydroxamate                               |                                                                                                            |                                                                                                                          |
| Q9X195 | TM_1375 | PF13416 | spermidine/putrescine                          |                                                                                                            |                                                                                                                          |
| Q9WZ64 | TM_0595 | PF13416 | sugar                                          |                                                                                                            |                                                                                                                          |
| Q9X2H0 | TM_1855 | PF01547 | sugar                                          |                                                                                                            |                                                                                                                          |
| Q9X268 | TM_1746 | PF00496 | oligopeptide                                   |                                                                                                            |                                                                                                                          |
| Q9WXN8 | TM_0031 | PF00496 | dipeptide/oligopeptide                         | Cellobiose, laminaribiose, cellotriase, laminaripentaose, cellopentaose, cellohexaose                      | doi: 10.1074/jbc.M109.041624;<br>doi: 10.1128/AEM.72.2.1336-1345.2006; doi:<br>10.1074/jbc.M109.041624; PDB:<br>4JSO     |

| Q9X0V3                                            | TM_1226    | PF00496   | dipeptide/oligopeptide                         | Mannobiose,<br>mannohexaose, xylobiose,<br>xylopentaose,<br>laminaribiose, cellobiose,<br>mannopentaose,<br>cellopentaose | doi: 10.1074/jbc.M114.590992                                               |
|---------------------------------------------------|------------|-----------|------------------------------------------------|---------------------------------------------------------------------------------------------------------------------------|----------------------------------------------------------------------------|
| Q9WXW9                                            | TM_0114    | PF13407   | rhamnose                                       | Glucose, mannose, xylose<br>and galactose                                                                                 | doi: 10.1110/ps.072969407; doi:<br>10.1107/S1744309112045241;<br>PDB: 3C6Q |
| Q9WY32                                            | TM_0189    | PF01497   | iron-hydroxamate                               | Nickel                                                                                                                    | PDB: 2ETV                                                                  |
| Q9WYT2                                            | TM_0460    | PF00496   | dipeptide/oligopeptide                         |                                                                                                                           |                                                                            |
| Q9X0Z1                                            | TM_1264    | PF12849   | phosphate                                      |                                                                                                                           |                                                                            |
| Q9WYR3                                            | TM_0432    | PF01547   | sugar                                          |                                                                                                                           |                                                                            |
| Q9X0W2                                            | TM_1235    | PF13416   | sugar                                          |                                                                                                                           |                                                                            |
| Q9X0L9                                            | TM_1135    | PF13458   | leucine/valine                                 | Phenylalanine                                                                                                             | PDB: 3TD9                                                                  |
| Q9X0F7                                            | TM_1067    | PF00496   | Unclassified                                   |                                                                                                                           |                                                                            |
| Q9WYD6                                            | TM_0300    | PF00496   | dipeptide/oligopeptide                         |                                                                                                                           |                                                                            |
| <b>Shewanella oneidensis MR-1</b>                 |            |           |                                                |                                                                                                                           |                                                                            |
| Number of ORFs in the proteome: 4068              |            |           |                                                |                                                                                                                           |                                                                            |
| Number of SBPs: 28 (0.69% of total)               |            |           |                                                |                                                                                                                           |                                                                            |
| Lifestyle Summary: SEDIMENTS (MARINE/FRESH WATER) |            |           |                                                |                                                                                                                           |                                                                            |
| SeqID                                             | Gene Locus | Pfam Code | Ligand prediction by TransportDB               | Experimentally identified ligands                                                                                         | References/pdb accession codes                                             |
| Q8EA34                                            | SO_4075    | PF00497   | Unclassified                                   |                                                                                                                           |                                                                            |
| Q8EBT7                                            | SO_3412    | PF00497   | amino acid<br>(glutamine/glutamate/aspartate?) |                                                                                                                           |                                                                            |
| Q8EHG1                                            | SO_1260    | PF00497   | amino acid<br>(glutamine/glutamate/aspartate?) |                                                                                                                           |                                                                            |
| Q8EI09                                            | SO_1044    | PF00497   | amino acid<br>(glutamine/glutamate/aspartate?) |                                                                                                                           |                                                                            |

|                                        |         |         |                                                |           |                        |
|----------------------------------------|---------|---------|------------------------------------------------|-----------|------------------------|
| Q8EGT8                                 | SO_1503 | PF00497 | amino acid<br>(glutamine/glutamate/aspartate?) |           |                        |
| Q8EJA3                                 | SO_0565 | PF01297 | manganese/zinc ion                             |           |                        |
| Q8EK06                                 | SO_0300 | PF04348 | Not annotated in TransportDB                   |           |                        |
| Q8E9I5                                 | SO_4292 | PF12849 | phosphate                                      |           |                        |
| Q8EBM9                                 | SO_3481 | PF00497 | amino acid<br>(glutamine/glutamate/aspartate?) |           |                        |
| Q8EHW2                                 | SO_1100 | PF03480 | C4-dicarboxylate                               |           |                        |
| Q8EC12                                 | SO_3333 | PF01547 | sugar                                          |           |                        |
| Q8EHJ2                                 | SO_1229 | PF00532 | trimethylamine N-oxide                         |           |                        |
| Q8ECK4                                 | SO_3134 | PF03480 | C4-dicarboxylate                               | Succinate | doi: 10.1021/bi501388y |
| Q8EGN9                                 | SO_1560 | PF12849 | phosphate                                      |           |                        |
| Q8EG09                                 | SO_1805 | PF00496 | dipeptide/oligopeptide                         |           |                        |
| Q8EFX6                                 | SO_1839 | PF00497 | amino acid<br>(glutamine/glutamate/aspartate?) |           |                        |
| Q8EJK7                                 | SO_0456 | PF16868 | phosphonates                                   |           |                        |
| Q8EKN6                                 | SO_0056 | PF00497 | amino acid<br>(glutamine/glutamate/aspartate?) |           |                        |
| Q8EHS4                                 | SO_1143 | PF00497 | amino acid<br>(glutamine/glutamate/aspartate?) |           |                        |
| Q8EJH9                                 | SO_0486 | PF05048 | Not annotated in TransportDB                   |           |                        |
| Q8EAN8                                 | SO_3860 | PF00497 | amino acid<br>(glutamine/glutamate/aspartate?) |           |                        |
| Q8EHF3                                 | SO_1270 | PF13416 | spermidine/putrescine                          |           |                        |
| Q8EB61                                 | SO_3673 | PF01497 | iron-hydroxamate                               |           |                        |
| Q8E8F1                                 | SO_4714 | PF00497 | amino acid<br>(glutamine/glutamate/aspartate?) |           |                        |
| Q8EFL2                                 | SO_1959 | PF04069 | glycine betaine                                |           |                        |
| Q8E8E6                                 | SO_4719 | PF12849 | tungsten                                       |           |                        |
| Q8EB26                                 | SO_3709 | PF01497 | iron-hydroxamate                               |           |                        |
| Q8EB22                                 | SO_3714 | PF13407 | rhamnose                                       |           |                        |
|                                        |         |         |                                                |           |                        |
| <b>Staphylococcus aureus NCTC 8325</b> |         |         |                                                |           |                        |

| Number of ORFs in the proteome: 2889     |               |           |                                                |                                                                                                              |                                                                                       |
|------------------------------------------|---------------|-----------|------------------------------------------------|--------------------------------------------------------------------------------------------------------------|---------------------------------------------------------------------------------------|
| Number of SBPs: 21 (0.73% of total)      |               |           |                                                |                                                                                                              |                                                                                       |
| Lifestyle Summary: HUMAN/ANIMAL PATHOGEN |               |           |                                                |                                                                                                              |                                                                                       |
| SeqID                                    | Gene Locus    | Pfam Code | Ligand prediction by TransportDB               | Experimentally identified ligands                                                                            | References/pdb accession codes                                                        |
| Q2FYP6                                   | SAOUHSC_01389 | PF12849   | phosphate                                      |                                                                                                              |                                                                                       |
| Q2G2P5                                   | SAOUHSC_00201 | PF00496   | dipeptide/oligopeptide                         | Nickel, histidine, Ni-(l-His) <sub>2</sub> complex, Ni-(l-His) (2-methyl-thiazolidine dicarboxylate) complex | doi: 10.1111/j.1365-2958.2010.07287.x; doi: 10.1039/c4mt00295d; PDB: 3RQT, 4OFJ, 4XKN |
| Q2FVE7                                   | SAOUHSC_02767 | PF00496   | nickel                                         | Metallophore staphylopin with nickel, cobalt and zinc                                                        | doi: 10.1111/mmi.12126; doi: 10.1073/pnas.1718382115                                  |
| Q2FZE6                                   | SAOUHSC_01085 | PF01497   | heme                                           | Ferric and ferrous heme                                                                                      | doi: 10.1016/j.bbrc.2004.06.025; doi: 10.1021/bi7009585                               |
| Q2G2D8                                   | SAOUHSC_00634 | PF01297   | zinc                                           |                                                                                                              |                                                                                       |
| Q2FZR2                                   | SAOUHSC_00928 | PF00496   | dipeptide/oligopeptide                         |                                                                                                              |                                                                                       |
| Q2FZR3                                   | SAOUHSC_00927 | PF00496   | oligopeptide                                   |                                                                                                              |                                                                                       |
| Q2G2A8                                   | SAOUHSC_01049 | PF13416   | spermidine/putrescine                          |                                                                                                              |                                                                                       |
| Q2FW75                                   | SAOUHSC_02430 | PF01497   | iron-hydroxamate                               |                                                                                                              |                                                                                       |
| Q2FWN6                                   | SAOUHSC_02246 | PF01497   | iron-hydroxamate                               |                                                                                                              |                                                                                       |
| Q2G071                                   | SAOUHSC_00749 | PF01497   | iron-hydroxamate                               |                                                                                                              |                                                                                       |
| Q2G1E9                                   | SAOUHSC_00176 | PF13416   | sugar (maltose?)                               | Maltose                                                                                                      | PDB: 4HW8                                                                             |
| Q2FZZ0                                   | SAOUHSC_00844 | PF03180   | methionine                                     |                                                                                                              |                                                                                       |
| Q2G0V0                                   | SAOUHSC_00426 | PF03180   | methionine                                     |                                                                                                              |                                                                                       |
| Q2FVH0                                   | SAOUHSC_02742 | PF04069   | glycine betaine                                |                                                                                                              |                                                                                       |
| Q2G1N4                                   | SAOUHSC_00074 | PF01497   | iron-hydroxamate                               |                                                                                                              |                                                                                       |
| Q2FVL2                                   | SAOUHSC_02699 | PF00497   | amino acid<br>(glutamine/glutamate/aspartate?) |                                                                                                              |                                                                                       |
| Q2FZM4                                   | SAOUHSC_00976 | PF01497   | iron-hydroxamate                               |                                                                                                              |                                                                                       |

| Q2FVW9                                   | SAOUHSC_02554 | PF01497   | iron-hydroxamate                               | Hydroxamate siderophores<br>(e.g. ferrichrome,<br>ferrioxamine-B) | doi: 10.1042/BJ20121426; doi:<br>10.1021/bi401349d. |
|------------------------------------------|---------------|-----------|------------------------------------------------|-------------------------------------------------------------------|-----------------------------------------------------|
| Q2G0F6                                   | SAOUHSC_00613 | PF01497   | iron-hydroxamate                               |                                                                   |                                                     |
| Q2G1F5                                   | SAOUHSC_00170 | PF00496   | dipeptide/oligopeptide                         |                                                                   |                                                     |
|                                          |               |           |                                                |                                                                   |                                                     |
| <b>Yersinia pestis Nepal516</b>          |               |           |                                                |                                                                   |                                                     |
| Number of ORFs in the proteome: 3946     |               |           |                                                |                                                                   |                                                     |
| Number of SBPs: 69 (1.75% of total)      |               |           |                                                |                                                                   |                                                     |
| Lifestyle Summary: HUMAN/ANIMAL PATHOGEN |               |           |                                                |                                                                   |                                                     |
| SeqID                                    | Gene Locus    | Pfam Code | Ligand prediction by TransportDB               | Experimentally identified ligands                                 | References/pdb accession codes                      |
| Q1CNC9                                   | YPN_0168      | PF13416   | sugar                                          |                                                                   |                                                     |
| Q1CN18                                   | YPN_0279      | PF13407   | rhamnose                                       |                                                                   |                                                     |
| Q1CLU2                                   | YPN_0706      | PF01497   | iron-hydroxamate                               |                                                                   |                                                     |
| A0A0H2YMN                                | YPN_MT0044    | PF09084   | nitrate/sulfonate/taurine                      |                                                                   |                                                     |
| A0A0H2YI45                               | YPN_1799      | PF00496   | oligopeptide                                   |                                                                   |                                                     |
| A0A0H2YLS4                               | YPN_3431      | PF04348   | Not annotated in TransportDB                   |                                                                   |                                                     |
| A0A0H2YIRC                               | YPN_2461      | PF13407   | ribose                                         |                                                                   |                                                     |
| A0A0H2YIL8                               | YPN_1745      | PF13407   | xylose                                         |                                                                   |                                                     |
| A0A0H2YKX3                               | YPN_2703      | PF00496   | Unclassified                                   |                                                                   |                                                     |
| A0A0H2YK53                               | YPN_3062      | PF13407   | xylose                                         |                                                                   |                                                     |
| A0A0H2YH5                                | YPN_1131      | PF04069   | glycine betaine                                |                                                                   |                                                     |
| A0A0H2YJ85                               | YPN_2685      | PF13407   | xylose                                         |                                                                   |                                                     |
| A0A0H2YJY6                               | YPN_2277      | PF00497   | amino acid<br>(glutamine/glutamate/aspartate?) |                                                                   |                                                     |
| A0A0H2YE57                               | YPN_0558      | PF01497   | iron-hydroxamate                               |                                                                   |                                                     |
| A0A0H2YGB                                | YPN_1506      | PF13416   | spermidine/putrescine                          |                                                                   |                                                     |
| A0A0H2YJV3                               | YPN_2107      | PF00497   | amino acid<br>(glutamine/glutamate/aspartate?) |                                                                   |                                                     |
| A0A0H2YJD3                               | YPN_2311      | PF13407   | rhamnose                                       |                                                                   |                                                     |
| A0A0H2YET7                               | YPN_0475      | PF01547   | sugar                                          |                                                                   |                                                     |

|            |          |         |                                                |  |  |
|------------|----------|---------|------------------------------------------------|--|--|
| A0A0H2YES8 | YPN_0027 | PF01547 | sugar (maltose?)                               |  |  |
| A0A0H2YGV  | YPN_0765 | PF13407 | rhamnose                                       |  |  |
| A0A0H2YFZ4 | YPN_1335 | PF13416 | iron(III)                                      |  |  |
| A0A0H2YIS1 | YPN_2472 | PF13407 | xylose                                         |  |  |
| A0A0H2YK01 | YPN_2173 | PF00497 | amino acid<br>(glutamine/glutamate/aspartate?) |  |  |
| A0A0H2YKE6 | YPN_2444 | PF01497 | iron-hydroxamate                               |  |  |
| A0A0H2YJ47 | YPN_2632 | PF00497 | amino acid<br>(glutamine/glutamate/aspartate?) |  |  |
| A0A0H2YFR3 | YPN_0839 | PF00497 | amino acid<br>(glutamine/glutamate/aspartate?) |  |  |
| A0A0H2YFB4 | YPN_1065 | PF13407 | xylose                                         |  |  |
| A0A0H2YIJ5 | YPN_2401 | PF03480 | C4-dicarboxylate                               |  |  |
| A0A0H2YK91 | YPN_2662 | PF03180 | methionine                                     |  |  |
| A0A0H2YIS2 | YPN_1648 | PF00496 | oligopeptide                                   |  |  |
| A0A0H2YIJ6 | YPN_1724 | PF00532 | ribose                                         |  |  |
| A0A0H2YJ61 | YPN_2232 | PF01547 | sugar                                          |  |  |
| A0A0H2YIE4 | YPN_1893 | PF01297 | zinc                                           |  |  |
| A0A0H2YFL2 | YPN_0775 | PF13407 | ribose                                         |  |  |
| A0A0H2YKN  | YPN_2781 | PF04069 | glycine betaine                                |  |  |
| A0A0H2YHF  | YPN_1538 | PF01297 | zinc                                           |  |  |
| A0A0H2YKZ8 | YPN_2928 | PF03180 | methionine                                     |  |  |
| A0A0H2YFY3 | YPN_1295 | PF13416 | spermidine/putrescine                          |  |  |
| A0A0H2YNK  | YPN_3974 | PF12849 | phosphate                                      |  |  |
| A0A0H2YDE  | YPN_0156 | PF13458 | leucine/valine                                 |  |  |
| A0A0H2YI63 | YPN_1815 | PF00496 | oligopeptide                                   |  |  |
| A0A0H2YG1  | YPN_0615 | PF01547 | sugar                                          |  |  |
| A0A0H2YJ69 | YPN_2669 | PF01497 | iron-hydroxamate                               |  |  |
| A0A0H2YFH  | YPN_1100 | PF00497 | amino acid<br>(glutamine/glutamate/aspartate?) |  |  |
| A0A0H2YHT  | YPN_2071 | PF13416 | sugar                                          |  |  |
| A0A0H2YLS0 | YPN_3611 | PF13407 | xylose                                         |  |  |
| A0A0H2YM4  | YPN_3652 | PF00496 | dipeptide/oligopeptide                         |  |  |

| A0A0H2YK84                             | YPN_2649   | PF13416   | spermidine/putrescine                          |                                   |                                |
|----------------------------------------|------------|-----------|------------------------------------------------|-----------------------------------|--------------------------------|
| A0A0H2YMS5                             | YPN_3885   | PF04069   | glycine betaine                                |                                   |                                |
| A0A0H2YEX0                             | YPN_0886   | PF12849   | phosphate                                      |                                   |                                |
| A0A0H2YKF4                             | YPN_3153   | PF01497   | iron-hydroxamate                               |                                   |                                |
| A0A0H2YNK1                             | YPN_3968   | PF00497   | amino acid<br>(glutamine/glutamate/aspartate?) |                                   |                                |
| A0A0H2YLN1                             | YPN_3537   | PF13407   | rhamnose                                       |                                   |                                |
| A0A0H2YM71                             | YPN_3157   | PF13407   | xylose                                         |                                   |                                |
| A0A0H2YEI4                             | YPN_0640   | PF00496   | dipeptide/oligopeptide                         |                                   |                                |
| A0A0H2YEJ4                             | YPN_0699   | PF01497   | iron-hydroxamate                               |                                   |                                |
| A0A0H2YF52                             | YPN_0059   | PF13407   | xylose                                         |                                   |                                |
| A0A0H2YN33                             | YPN_3670   | PF01497   | iron-hydroxamate                               |                                   |                                |
| A0A0H2YHE1                             | YPN_1911   | PF01547   | sugar                                          |                                   |                                |
| A0A0H2YKS6                             | YPN_2641   | PF01497   | iron-hydroxamate                               |                                   |                                |
| A0A0H2YJI5                             | YPN_2780   | PF04069   | glycine betaine                                |                                   |                                |
| A0A0H2YFI3                             | YPN_1143   | PF00496   | dipeptide/oligopeptide                         |                                   |                                |
| A0A0H2YK79                             | YPN_2643   | PF00497   | amino acid<br>(glutamine/glutamate/aspartate?) |                                   |                                |
| A0A0H2YMQ1                             | YPN_3386   | PF01497   | iron-hydroxamate                               |                                   |                                |
| A0A0H2YMF1                             | YPN_3546   | PF09084   | nitrate/sulfonate/taurine                      |                                   |                                |
| A0A0H2YJU3                             | YPN_2095   | PF13407   | xylose                                         |                                   |                                |
| A0A0H2YLZ6                             | YPN_3058   | PF13416   | sugar (maltose?)                               |                                   |                                |
| A0A0H2YGT1                             | YPN_0750   | PF00497   | amino acid<br>(glutamine/glutamate/aspartate?) |                                   |                                |
| A0A0H2YM77                             | YPN_3684   | PF13407   | xylose                                         |                                   |                                |
|                                        |            |           |                                                |                                   |                                |
| <b>Anabaena cylindrica PCC 7122</b>    |            |           |                                                |                                   |                                |
| Number of ORFs in the proteome: 5797   |            |           |                                                |                                   |                                |
| Number of SBPs: 28 (0.48% of total)    |            |           |                                                |                                   |                                |
| Lifestyle Summary: FRESH/MARINE WATERS |            |           |                                                |                                   |                                |
| SeqID                                  | Gene Locus | Pfam Code | Ligand prediction by TransportDB               | Experimentally identified ligands | References/pdb accession codes |
| K9ZLI1                                 | Anacy_4280 | PF12849   | phosphate                                      |                                   |                                |

|                                       |            |         |                                                |  |  |
|---------------------------------------|------------|---------|------------------------------------------------|--|--|
| K9ZDH1                                | Anacy_1759 | PF09084 | nitrate/sulfonate/taurine                      |  |  |
| K9ZLK4                                | Anacy_4052 | PF00497 | amino acid<br>(glutamine/glutamate/aspartate?) |  |  |
| K9ZDQ5                                | Anacy_1853 | PF01547 | sugar                                          |  |  |
| K9ZMB3                                | Anacy_5033 | PF00496 | dipeptide/oligopeptide                         |  |  |
| K9ZDY8                                | Anacy_1266 | PF09084 | nitrate/sulfonate/taurine                      |  |  |
| K9ZJ32                                | Anacy_2938 | PF01497 | iron-hydroxamate                               |  |  |
| K9Z908                                | Anacy_0041 | PF01297 | zinc                                           |  |  |
| K9ZJU9                                | Anacy_3410 | PF03480 | C4-dicarboxylate                               |  |  |
| K9ZC17                                | Anacy_0328 | PF16868 | phosphonates                                   |  |  |
| K9ZF45                                | Anacy_1688 | PF01297 | zinc                                           |  |  |
| K9ZMG6                                | Anacy_5057 | PF00497 | amino acid<br>(glutamine/glutamate/aspartate?) |  |  |
| K9ZEL9                                | Anacy_1269 | PF09084 | glycine betaine                                |  |  |
| K9ZEC3                                | Anacy_2062 | PF01547 | sugar                                          |  |  |
| K9ZFT0                                | Anacy_2643 | PF00496 | dipeptide/oligopeptide                         |  |  |
| K9ZIS4                                | Anacy_2786 | PF12849 | phosphate                                      |  |  |
| K9ZLG0                                | Anacy_4260 | PF01497 | iron-hydroxamate                               |  |  |
| K9ZG83                                | Anacy_2783 | PF12849 | phosphate                                      |  |  |
| K9ZIK1                                | Anacy_3179 | PF13416 | spermidine/putrescine                          |  |  |
| K9ZAR1                                | Anacy_0691 | PF01497 | iron-hydroxamate                               |  |  |
| K9ZPV6                                | Anacy_5046 | PF12849 | phosphate                                      |  |  |
| K9ZMQ7                                | Anacy_5152 | PF13416 | sugar                                          |  |  |
| K9ZI48                                | Anacy_3873 | PF01094 | leucine/valine                                 |  |  |
| K9ZPQ2                                | Anacy_5449 | PF01497 | iron-hydroxamate                               |  |  |
| K9ZCL6                                | Anacy_1410 | PF01297 | zinc                                           |  |  |
| K9ZIG1                                | Anacy_3144 | PF12727 | phosphate                                      |  |  |
| K9ZLM4                                | Anacy_4078 | PF01497 | iron-hydroxamate                               |  |  |
| K9ZQJ4                                | Anacy_5495 | PF12849 | phosphate                                      |  |  |
|                                       |            |         |                                                |  |  |
|                                       |            |         |                                                |  |  |
| <b><i>Serratia plymuthica</i> S13</b> |            |         |                                                |  |  |
| Number of ORFs in the proteome: 4986  |            |         |                                                |  |  |
| Number of SBPs: 95 (1.91% of total)   |            |         |                                                |  |  |



| Lifestyle Summary: BENEFICIAL PLANT ASSOCIATED |            |           |                                                |                                   |                                |
|------------------------------------------------|------------|-----------|------------------------------------------------|-----------------------------------|--------------------------------|
| SeqID                                          | Gene Locus | Pfam Code | Ligand prediction by TransportDB               | Experimentally identified ligands | References/pdb accession codes |
| S4YK96                                         | M621_04840 | PF13407   | rhamnose                                       |                                   |                                |
| S4YIL6                                         | M621_12240 | PF13407   | xylose                                         |                                   |                                |
| S4YI45                                         | M621_09920 | PF13407   | xylose                                         |                                   |                                |
| S4YL11                                         | M621_16065 | PF09084   | nitrate/sulfonate/taurine                      |                                   |                                |
| S4YJ07                                         | M621_13460 | PF00496   | oligopeptide                                   |                                   |                                |
| S4YP20                                         | M621_23360 | PF01547   | sugar (maltose?)                               |                                   |                                |
| S4YI76                                         | M621_11645 | PF01547   | sugar                                          |                                   |                                |
| S4YPH6                                         | M621_16675 | PF09084   | nitrate/sulfonate/taurine                      |                                   |                                |
| S4YH44                                         | M621_09660 | PF00497   | amino acid<br>(glutamine/glutamate/aspartate?) |                                   |                                |
| S4YJ92                                         | M621_12765 | PF03180   | methionine                                     |                                   |                                |
| S4YLZ4                                         | M621_08450 | PF13416   | spermidine/putrescine                          |                                   |                                |
| S4YIC6                                         | M621_16325 | PF01497   | iron-hydroxamate                               |                                   |                                |
| S4YH87                                         | M621_09940 | PF03180   | methionine                                     |                                   |                                |
| S4YKL6                                         | M621_17205 | PF00496   | oligopeptide                                   |                                   |                                |
| S4YPH4                                         | M621_13880 | PF00496   | oligopeptide                                   |                                   |                                |
| S4YIK0                                         | M621_10915 | PF01497   | iron-hydroxamate                               |                                   |                                |
| S4YTG5                                         | M621_23240 | PF00497   | amino acid<br>(glutamine/glutamate/aspartate?) |                                   |                                |
| S4YIS1                                         | M621_12780 | PF09084   | glycine betaine                                |                                   |                                |
| S4YCT3                                         | M621_00915 | PF13458   | leucine/valine                                 |                                   |                                |
| S4YGS8                                         | M621_07025 | PF01497   | iron-hydroxamate                               |                                   |                                |
| S4YMM4                                         | M621_09935 | PF13407   | xylose                                         |                                   |                                |
| S4YJ21                                         | M621_12045 | PF13407   | ribose                                         |                                   |                                |
| S4YPB3                                         | M621_16125 | PF13407   | ribose                                         |                                   |                                |
| S4YGS9                                         | M621_06925 | PF03180   | methionine                                     |                                   |                                |
| S4YL86                                         | M621_16880 | PF13458   | leucine/valine                                 |                                   |                                |
| S4YFK1                                         | M621_04905 | PF12849   | phosphate                                      |                                   |                                |
| S4YEA5                                         | M621_07995 | PF13407   | ribose                                         |                                   |                                |

|        |            |         |                                                |  |  |
|--------|------------|---------|------------------------------------------------|--|--|
| S4YE25 | M621_07610 | PF00497 | amino acid<br>(glutamine/glutamate/aspartate?) |  |  |
| S4YIU9 | M621_12985 | PF13407 | ribose                                         |  |  |
| S4YQ21 | M621_25465 | PF13407 | ribose                                         |  |  |
| S4YPC3 | M621_23840 | PF04069 | glycine betaine                                |  |  |
| S4YJ73 | M621_12600 | PF13407 | xylose                                         |  |  |
| S4YLT1 | M621_07950 | PF13407 | xylose                                         |  |  |
| S4YKN4 | M621_15030 | PF00497 | amino acid<br>(glutamine/glutamate/aspartate?) |  |  |
| S4YCH5 | M621_04335 | PF00497 | amino acid<br>(glutamine/glutamate/aspartate?) |  |  |
| S4YKW0 | M621_17635 | PF00497 | amino acid<br>(glutamine/glutamate/aspartate?) |  |  |
| S4YGS6 | M621_06995 | PF00497 | amino acid<br>(glutamine/glutamate/aspartate?) |  |  |
| S4YMM5 | M621_24795 | PF13407 | ribose                                         |  |  |
| S4YAF9 | M621_00295 | PF13407 | xylose                                         |  |  |
| S4YI85 | M621_10520 | PF09084 | nitrate/sulfonate/taurine                      |  |  |
| S4YKG7 | M621_20890 | PF13407 | rhamnose                                       |  |  |
| S4YUX6 | M621_25610 | PF00497 | amino acid<br>(glutamine/glutamate/aspartate?) |  |  |
| S4YH53 | M621_07890 | PF00496 | dipeptide/oligopeptide                         |  |  |
| S4YX86 | M621_16705 | PF09084 | nitrate/sulfonate/taurine                      |  |  |
| S4YIX5 | M621_13210 | PF13458 | leucine/valine                                 |  |  |
| S4YEI3 | M621_08495 | PF00497 | amino acid<br>(glutamine/glutamate/aspartate?) |  |  |
| S4YLN0 | M621_17715 | PF03401 | tricarboxylate                                 |  |  |
| S4YFV5 | M621_07150 | PF03180 | methionine                                     |  |  |
| S4YNA5 | M621_11375 | PF00532 | ribose                                         |  |  |
| S4YGD2 | M621_08480 | PF00497 | amino acid<br>(glutamine/glutamate/aspartate?) |  |  |
| S4YEM1 | M621_02185 | PF00496 | dipeptide/oligopeptide                         |  |  |
| S4YK48 | M621_14100 | PF00496 | dipeptide/oligopeptide                         |  |  |

|        |            |         |                                                |  |  |
|--------|------------|---------|------------------------------------------------|--|--|
| S4YL84 | M621_22610 | PF04348 | Not annotated in TransportDB                   |  |  |
| S4YIY4 | M621_11910 | PF00496 | dipeptide/oligopeptide                         |  |  |
| S4YJK9 | M621_13545 | PF00496 | oligopeptide                                   |  |  |
| S4YQ98 | M621_03605 | PF00497 | amino acid<br>(glutamine/glutamate/aspartate?) |  |  |
| S4YDH4 | M621_00475 | PF00496 | dipeptide/oligopeptide                         |  |  |
| S4YDM9 | M621_00945 | PF13416 | sugar                                          |  |  |
| S4YP37 | M621_12745 | PF01497 | iron-hydroxamate                               |  |  |
| S4YMZ3 | M621_10725 | PF01297 | zinc                                           |  |  |
| S4YPN3 | M621_19345 | PF13416 | spermidine/putrescine                          |  |  |
| S4YJS9 | M621_14910 | PF00496 | dipeptide/oligopeptide                         |  |  |
| S4YEV3 | M621_03420 | PF01497 | iron-hydroxamate                               |  |  |
| S4YPA7 | M621_16070 | PF00497 | amino acid<br>(glutamine/glutamate/aspartate?) |  |  |
| S4YJK0 | M621_13095 | PF00496 | oligopeptide                                   |  |  |
| S4YMN3 | M621_19910 | PF04069 | glycine betaine                                |  |  |
| S4YMU9 | M621_10445 | PF09084 | nitrate/sulfonate/taurine                      |  |  |
| S4YS73 | M621_21115 | PF01497 | iron-hydroxamate                               |  |  |
| S4YG85 | M621_11995 | PF00497 | amino acid<br>(glutamine/glutamate/aspartate?) |  |  |
| S4YPN9 | M621_14265 | PF01297 | zinc                                           |  |  |
| S4YMI2 | M621_20025 | PF03180 | methionine                                     |  |  |
| S4YFG5 | M621_04765 | PF01497 | iron-hydroxamate                               |  |  |
| S4YIK1 | M621_12130 | PF13416 | sugar (maltose?)                               |  |  |
| S4YCL5 | M621_04550 | PF00496 | dipeptide/oligopeptide                         |  |  |
| S4YH59 | M621_13875 | PF00496 | oligopeptide                                   |  |  |
| S4YIL3 | M621_12215 | PF01497 | iron-hydroxamate                               |  |  |
| S4YUE4 | M621_24465 | PF13407 | rhamnose                                       |  |  |
| S4YGD8 | M621_06080 | PF00497 | amino acid<br>(glutamine/glutamate/aspartate?) |  |  |
| S4YHN5 | M621_08900 | PF09084 | nitrate/sulfonate/taurine                      |  |  |
| S4YJJ0 | M621_13015 | PF01547 | sugar                                          |  |  |
| S4YPK6 | M621_25585 | PF12849 | phosphate                                      |  |  |

| S4YL73                                      | M621_18225        | PF00496          | dipeptide/oligopeptide                         |                                          |                                       |
|---------------------------------------------|-------------------|------------------|------------------------------------------------|------------------------------------------|---------------------------------------|
| S4YP18                                      | M621_12950        | PF03180          | methionine                                     |                                          |                                       |
| S4YN85                                      | M621_20985        | PF13416          | iron(III)                                      |                                          |                                       |
| S4YG35                                      | M621_05330        | PF01297          | zinc                                           |                                          |                                       |
| S4YIK3                                      | M621_16995        | PF00497          | amino acid<br>(glutamine/glutamate/aspartate?) |                                          |                                       |
| S4YHV0                                      | M621_14930        | PF00496          | dipeptide/oligopeptide                         |                                          |                                       |
| S4YIH5                                      | M621_10760        | PF01497          | iron-hydroxamate                               |                                          |                                       |
| S4YFY8                                      | M621_07415        | PF04069          | glycine betaine                                |                                          |                                       |
| S4YLS2                                      | M621_18180        | PF01497          | iron-hydroxamate                               |                                          |                                       |
| S4YPY1                                      | M621_14665        | PF00496          | dipeptide/oligopeptide                         |                                          |                                       |
| S4YNT6                                      | M621_12260        | PF00497          | amino acid<br>(glutamine/glutamate/aspartate?) |                                          |                                       |
| S4YL55                                      | M621_16550        | PF00496          | dipeptide/oligopeptide                         |                                          |                                       |
| S4YL90                                      | M621_16935        | PF04069          | glycine betaine                                |                                          |                                       |
| S4YNU4                                      | M621_12345        | PF00497          | amino acid<br>(glutamine/glutamate/aspartate?) |                                          |                                       |
|                                             |                   |                  |                                                |                                          |                                       |
| <b><i>Klebsiella pneumoniae</i> HS11286</b> |                   |                  |                                                |                                          |                                       |
| Number of ORFs in the proteome: 5728        |                   |                  |                                                |                                          |                                       |
| Number of SBPs: 88 (1.54% of total)         |                   |                  |                                                |                                          |                                       |
| Lifestyle Summary: HUMAN/ANIMAL PATHOGEN    |                   |                  |                                                |                                          |                                       |
| <b>SeqID</b>                                | <b>Gene Locus</b> | <b>Pfam Code</b> | <b>Ligand prediction by TransportDB</b>        | <b>Experimentally identified ligands</b> | <b>References/pdb accession codes</b> |
| A0A0H3H45                                   | KPHS_49660        | PF13416          | sugar                                          |                                          |                                       |
| A0A0H3GZF                                   | KPHS_31610        | PF03180          | methionine                                     |                                          |                                       |
| A0A0H3GQV                                   | KPHS_30000        | PF00496          | dipeptide/oligopeptide                         |                                          |                                       |
| A0A0H3GM3                                   | KPHS_17700        | PF00497          | amino acid<br>(glutamine/glutamate/aspartate?) |                                          |                                       |
| A0A0H3GPU                                   | KPHS_14790        | PF13407          | ribose                                         |                                          |                                       |
| A0A0H3GTC                                   | KPHS_13410        | PF00497          | amino acid<br>(glutamine/glutamate/aspartate?) |                                          |                                       |
| A0A0H3GII9                                  | KPHS_09070        | PF01497          | iron-hydroxamate                               |                                          |                                       |

|           |            |         |                                                |  |  |
|-----------|------------|---------|------------------------------------------------|--|--|
| A0A0H3GK5 | KPHS_10350 | PF00497 | amino acid<br>(glutamine/glutamate/aspartate?) |  |  |
| A0A0H3GTJ | KPHS_46370 | PF13407 | rhamnose                                       |  |  |
| A0A0H3GZM | KPHS_49730 | PF13458 | leucine/valine                                 |  |  |
| A0A0H3GUC | KPHS_32440 | PF13407 | xylose                                         |  |  |
| A0A0H3GKE | KPHS_16720 | PF00497 | amino acid<br>(glutamine/glutamate/aspartate?) |  |  |
| A0A0H3GX1 | KPHS_42180 | PF09084 | glycine betaine                                |  |  |
| A0A0H3GMI | KPHS_04640 | PF13407 | ribose                                         |  |  |
| A0A0H3GKX | KPHS_02580 | PF01547 | sugar (maltose?)                               |  |  |
| A0A0H3GQ8 | KPHS_34170 | PF00532 | ribose                                         |  |  |
| A0A0H3GQV | KPHS_17730 | PF00497 | amino acid<br>(glutamine/glutamate/aspartate?) |  |  |
| A0A0H3GMI | KPHS_18800 | PF00496 | oligopeptide                                   |  |  |
| A0A0H3GUR | KPHS_30830 | PF01497 | iron-hydroxamate                               |  |  |
| A0A0H3GPS | KPHS_14590 | PF13407 | ribose                                         |  |  |
| A0A0H3GQ4 | KPHS_27550 | PF09084 | nitrate/sulfonate/taurine                      |  |  |
| A0A0H3GR2 | KPHS_30800 | PF00497 | amino acid<br>(glutamine/glutamate/aspartate?) |  |  |
| A0A0H3GX5 | KPHS_43240 | PF01547 | sugar                                          |  |  |
| A0A0H3GZX | KPHS_50580 | PF00496 | dipeptide/oligopeptide                         |  |  |
| A0A0H3GWI | KPHS_41040 | PF01297 | zinc                                           |  |  |
| A0A0H3GM1 | KPHS_03290 | PF13407 | rhamnose                                       |  |  |
| A0A0H3GVX | KPHS_35980 | PF00496 | dipeptide/oligopeptide                         |  |  |
| A0A0H3GNV | KPHS_10490 | PF04069 | glycine betaine                                |  |  |
| A0A0H3GGS | KPHS_00100 | PF13407 | ribose                                         |  |  |
| A0A0H3H4N | KPHS_51960 | PF03180 | methionine                                     |  |  |
| A0A0H3GVG | KPHS_33930 | PF01297 | zinc                                           |  |  |
| A0A0H3GP9 | KPHS_30220 | PF09084 | nitrate/sulfonate/taurine                      |  |  |
| A0A0H3HOT | KPHS_36510 | PF13407 | xylose                                         |  |  |
| A0A0H3GNY | KPHS_28670 | PF00497 | amino acid<br>(glutamine/glutamate/aspartate?) |  |  |
| A0A0H3GW3 | KPHS_41640 | PF01497 | iron-hydroxamate                               |  |  |

|           |            |         |                                                |  |  |
|-----------|------------|---------|------------------------------------------------|--|--|
| A0A0H3GZA | KPHS_30910 | PF09084 | nitrate/sulfonate/taurine                      |  |  |
| A0A0H3GTZ | KPHS_15210 | PF00497 | amino acid<br>(glutamine/glutamate/aspartate?) |  |  |
| A0A0H3GTP | KPHS_14310 | PF13407 | ribose                                         |  |  |
| A0A0H3GL8 | KPHS_14450 | PF01497 | iron-hydroxamate                               |  |  |
| A0A0H3GX4 | KPHS_40830 | PF04069 | glycine betaine                                |  |  |
| A0A0H3H0S | KPHS_36310 | PF04069 | glycine betaine                                |  |  |
| A0A0H3GGY | KPHS_02970 | PF13416 | spermidine/putrescine                          |  |  |
| A0A0H3GS7 | KPHS_22230 | PF00496 | oligopeptide                                   |  |  |
| A0A0H3GN7 | KPHS_25870 | PF03180 | methionine                                     |  |  |
| A0A0H3GV3 | KPHS_52320 | PF01547 | 2-aminoethylphosphonate                        |  |  |
| A0A0H3GS1 | KPHS_09010 | PF01497 | iron-hydroxamate                               |  |  |
| A0A0H3GM1 | KPHS_22020 | PF00496 | oligopeptide                                   |  |  |
| A0A0H3GXB | KPHS_41530 | PF01297 | zinc                                           |  |  |
| A0A0H3GLS | KPHS_21120 | PF13416 | spermidine/putrescine                          |  |  |
| A0A0H3GZ3 | KPHS_30160 | PF09084 | nitrate/sulfonate/taurine                      |  |  |
| A0A0H3GTV | KPHS_27930 | PF00497 | amino acid<br>(glutamine/glutamate/aspartate?) |  |  |
| A0A0H3GXT | KPHS_53000 | PF12849 | phosphate                                      |  |  |
| A0A0H3GZU | KPHS_32960 | PF13458 | leucine/valine                                 |  |  |
| A0A0H3GKG | KPHS_16970 | PF00496 | dipeptide/oligopeptide                         |  |  |
| A0A0H3GQH | KPHS_28900 | PF00496 | dipeptide/oligopeptide                         |  |  |
| A0A0H3GYC | KPHS_50890 | PF13407 | xylose                                         |  |  |
| A0A0H3GU7 | KPHS_29030 | PF13416 | spermidine/putrescine                          |  |  |
| A0A0H3GP5 | KPHS_13180 | PF13407 | xylose                                         |  |  |
| A0A0H3GSY | KPHS_26740 | PF13407 | rhamnose                                       |  |  |
| A0A0H3GR3 | KPHS_30900 | PF09084 | nitrate/sulfonate/taurine                      |  |  |
| A0A0H3GW1 | KPHS_23360 | PF03180 | methionine                                     |  |  |
| A0A0H3GUD | KPHS_49770 | PF13458 | leucine/valine                                 |  |  |
| A0A0H3GHK | KPHS_05320 | PF13416 | sugar                                          |  |  |
| A0A0H3GTM | KPHS_46920 | PF04348 | Not annotated in TransportDB                   |  |  |
| A0A0H3GZH | KPHS_31910 | PF00496 | oligopeptide                                   |  |  |

|                                          |            |         |                                                |  |  |
|------------------------------------------|------------|---------|------------------------------------------------|--|--|
| A0A0H3GWM                                | KPHS_37680 | PF00497 | amino acid<br>(glutamine/glutamate/aspartate?) |  |  |
| A0A0H3GV0                                | KPHS_34390 | PF00497 | amino acid<br>(glutamine/glutamate/aspartate?) |  |  |
| A0A0H3GJS1                               | KPHS_14020 | PF00497 | amino acid<br>(glutamine/glutamate/aspartate?) |  |  |
| A0A0H3GR7                                | KPHS_37670 | PF00497 | amino acid<br>(glutamine/glutamate/aspartate?) |  |  |
| A0A0H3GKJ8                               | KPHS_11700 | PF13416 | sugar (maltose?)                               |  |  |
| A0A0H3GQ1                                | KPHS_27150 | PF00497 | amino acid<br>(glutamine/glutamate/aspartate?) |  |  |
| A0A0H3GHC                                | KPHS_05970 | PF13407 | rhamnose                                       |  |  |
| A0A0H3H24                                | KPHS_42210 | PF03180 | methionine                                     |  |  |
| A0A0H3GNN                                | KPHS_09440 | PF03180 | methionine                                     |  |  |
| A0A0H3GU5                                | KPHS_31390 | PF01497 | cobalamin                                      |  |  |
| A0A0H3GSG                                | KPHS_10410 | PF13458 | leucine/valine                                 |  |  |
| A0A0H3GPF                                | KPHS_14130 | PF00496 | dipeptide/oligopeptide                         |  |  |
| A0A0H3HOV                                | KPHS_36760 | PF00496 | oligopeptide                                   |  |  |
| A0A0H3GL4                                | KPHS_18520 | PF09084 | nitrate/sulfonate/taurine                      |  |  |
| A0A0H3GPD                                | KPHS_30670 | PF13416 | iron(III)                                      |  |  |
| A0A0H3GPG                                | KPHS_31070 | PF01497 | iron-hydroxamate                               |  |  |
| A0A0H3GGA                                | KPHS_00620 | PF13407 | rhamnose                                       |  |  |
| A0A0H3GVL                                | KPHS_20060 | PF13416 | 2-aminoethylphosphonate                        |  |  |
| A0A0H3GH8                                | KPHS_04070 | PF00497 | amino acid<br>(glutamine/glutamate/aspartate?) |  |  |
| A0A0H3GX0                                | KPHS_50050 | PF00496 | nickel                                         |  |  |
| A0A0H3GPG                                | KPHS_13340 | PF01497 | iron-hydroxamate                               |  |  |
| A0A0H3GKV                                | KPHS_17620 | PF13416 | spermidine/putrescine                          |  |  |
| A0A0H3GTC                                | KPHS_28240 | PF00496 | dipeptide/oligopeptide                         |  |  |
|                                          |            |         |                                                |  |  |
| <b><i>Sphingomonas wittichii</i> RW1</b> |            |         |                                                |  |  |
| Number of ORFs in the proteome: 5313     |            |         |                                                |  |  |
| Number of SBPs: 10 (0.19% of total)      |            |         |                                                |  |  |

| Lifestyle Summary: FRESH/MARINE WATERS |                 |           |                                                |                                   |                                |
|----------------------------------------|-----------------|-----------|------------------------------------------------|-----------------------------------|--------------------------------|
| SeqID                                  | Gene Locus      | Pfam Code | Ligand prediction by TransportDB               | Experimentally identified ligands | References/pdb accession codes |
| A5V9L7                                 | Swit_2625       | PF00497   | amino acid<br>(glutamine/glutamate/aspartate?) |                                   |                                |
| A5V5A4                                 | Swit_1104       | PF12849   | phosphate                                      |                                   |                                |
| A5V7K2                                 | Swit_1908       | PF13458   | urea                                           |                                   |                                |
| A5VD32                                 | Swit_3853       | PF00496   | oligopeptide                                   |                                   |                                |
| A5V443                                 | Swit_0692       | PF00497   | amino acid<br>(glutamine/glutamate/aspartate?) |                                   |                                |
| A5V9A1                                 | Swit_2508       | PF09084   | nitrate/sulfonate/taurine                      |                                   |                                |
| A5V2W4                                 | Swit_0259       | PF01497   | iron-hydroxamate                               |                                   |                                |
| A5V9H3                                 | Swit_2581       | PF13458   | leucine/valine                                 |                                   |                                |
| A5VD31                                 | Swit_3852       | PF00496   | oligopeptide                                   |                                   |                                |
| A5V3S2                                 | Swit_0570       | PF13458   | leucine/valine                                 |                                   |                                |
|                                        |                 |           |                                                |                                   |                                |
| <b>Burkholderia cepacia 383</b>        |                 |           |                                                |                                   |                                |
| Number of ORFs in the proteome: 7715   |                 |           |                                                |                                   |                                |
| Number of SBPs: 126 (1.63% of total)   |                 |           |                                                |                                   |                                |
| Lifestyle Summary: SOIL                |                 |           |                                                |                                   |                                |
| SeqID                                  | Gene Locus      | Pfam Code | Ligand prediction by TransportDB               | Experimentally identified ligands | References/pdb accession codes |
| Q391B0                                 | Bcep18194_B2845 | PF04069   | glycine betaine/L-proline                      |                                   |                                |
| Q39FX2                                 | Bcep18194_A5050 | PF13416   | spermidine/putrescine                          |                                   |                                |
| Q39G21                                 | Bcep18194_A5001 | PF00496   | oligopeptide                                   |                                   |                                |
| Q39P48                                 | Bcep18194_C6719 | PF13416   | spermidine/putrescine                          |                                   |                                |
| Q396G9                                 | Bcep18194_B1528 | PF09084   | nitrate/sulfonate/taurine                      |                                   |                                |
| Q39DE6                                 | Bcep18194_A5926 | PF01547   | sugar                                          |                                   |                                |
| Q39DE1                                 | Bcep18194_A5931 | PF01297   | manganese/zinc ion                             |                                   |                                |
| Q396Y7                                 | Bcep18194_B1360 | PF13416   | spermidine/putrescine                          |                                   |                                |
| Q397G3                                 | Bcep18194_B1284 | PF00497   | amino acid<br>(glutamine/glutamate/aspartate?) |                                   |                                |
| Q39GH6                                 | Bcep18194_A4845 | PF13416   | spermidine/putrescine                          |                                   |                                |



|        |                 |         |                                                |  |  |
|--------|-----------------|---------|------------------------------------------------|--|--|
| Q39I22 | Bcep18194_A4297 | PF00497 | amino acid<br>(glutamine/glutamate/aspartate?) |  |  |
| Q39LW9 | Bcep18194_C7503 | PF09084 | nitrate/sulfonate/taurine                      |  |  |
| Q39HA2 | Bcep18194_A4568 | PF13407 | ribose                                         |  |  |
| Q39B26 | Bcep18194_B0219 | PF01497 | hemin                                          |  |  |
| Q395F8 | Bcep18194_B1789 | PF00532 | ribose                                         |  |  |
| Q39GZ0 | Bcep18194_A4681 | PF13407 | ribose                                         |  |  |
| Q39BH1 | Bcep18194_B0073 | PF00497 | amino acid<br>(glutamine/glutamate/aspartate?) |  |  |
| Q391H6 | Bcep18194_B2779 | PF13416 | spermidine/putrescine                          |  |  |
| Q39C30 | Bcep18194_A6392 | PF00496 | dipeptide/oligopeptide                         |  |  |
| Q397U5 | Bcep18194_B1152 | PF09084 | nitrate/sulfonate/taurine                      |  |  |
| Q39JR2 | Bcep18194_A3703 | PF00532 | ribose                                         |  |  |
| Q39N36 | Bcep18194_C7086 | PF09084 | nitrate/sulfonate/taurine                      |  |  |
| Q39GQ9 | Bcep18194_A4762 | PF00497 | amino acid<br>(glutamine/glutamate/aspartate?) |  |  |
| Q39MK5 | Bcep18194_C7267 | PF00497 | amino acid<br>(glutamine/glutamate/aspartate?) |  |  |
| Q39HM8 | Bcep18194_A4442 | PF12849 | phosphate                                      |  |  |
| Q39LB9 | Bcep18194_C7703 | PF04069 | glycine betaine/L-proline                      |  |  |
| Q394E2 | Bcep18194_B2061 | PF09084 | nitrate/sulfonate/taurine                      |  |  |
| Q397J4 | Bcep18194_B1253 | PF00496 | dipeptide/oligopeptide                         |  |  |
| Q39LD9 | Bcep18194_C7683 | PF13416 | spermidine/putrescine                          |  |  |
| Q39LU7 | Bcep18194_C7525 | PF13416 | spermidine/putrescine                          |  |  |
| Q39GR3 | Bcep18194_A4758 | PF13416 | spermidine/putrescine                          |  |  |
| Q39F01 | Bcep18194_A5371 | PF00496 | oligopeptide                                   |  |  |
| Q39AZ0 | Bcep18194_B0255 | PF00497 | amino acid<br>(glutamine/glutamate/aspartate?) |  |  |
| Q39LM5 | Bcep18194_C7597 | PF13458 | branched-chain amino acid                      |  |  |
| Q39CF6 | Bcep18194_A6266 | PF00496 | dipeptide/oligopeptide                         |  |  |
| Q391S7 | Bcep18194_B2678 | PF13458 | branched-chain amino acid                      |  |  |
| Q39LH0 | Bcep18194_C7652 | PF09084 | nitrate/sulfonate/taurine                      |  |  |
| Q39J37 | Bcep18194_A3930 | PF16868 | C4-dicarboxylate                               |  |  |

|        |                 |         |                                                 |  |  |
|--------|-----------------|---------|-------------------------------------------------|--|--|
| Q398W3 | Bcep18194_B0884 | PF13407 | ribose                                          |  |  |
| Q396G7 | Bcep18194_B1530 | PF00497 | amino acid<br>(glutamine/glutamate/aspartate?)  |  |  |
| Q39DU1 | Bcep18194_A5781 | PF01497 | cobalamin/Fe3+-siderophores                     |  |  |
| Q392C3 | Bcep18194_B2582 | PF03180 | D-methionine                                    |  |  |
| Q39HK1 | Bcep18194_A4469 | PF13458 | branched-chain amino acid                       |  |  |
| Q39I42 | Bcep18194_A4277 | PF13458 | branched-chain amino acid                       |  |  |
| Q39L46 | Bcep18194_A3218 | PF09084 | nitrate/sulfonate/taurine                       |  |  |
| Q394D6 | Bcep18194_B2067 | PF00496 | dipeptide/oligopeptide                          |  |  |
| Q39BC9 | Bcep18194_B0115 | PF00496 | oligopeptide                                    |  |  |
| Q39P84 | Bcep18194_C6682 | PF00497 | amino acid<br>(glutamine/glutamate/aspartate?)  |  |  |
| Q397D8 | Bcep18194_B1309 | PF03480 | C4-dicarboxylate                                |  |  |
| Q394D4 | Bcep18194_B2069 | PF09084 | nitrate/sulfonate/taurine                       |  |  |
| Q39A98 | Bcep18194_B0499 | PF04069 | glycine betaine/L-<br>proline/carnitine/choline |  |  |
| Q39LC8 | Bcep18194_C7694 | PF04069 | glycine betaine/L-proline                       |  |  |
| Q39LS1 | Bcep18194_C7551 | PF04069 | glycine betaine/L-<br>proline/carnitine/choline |  |  |
| Q398C7 | Bcep18194_B1070 | PF12849 | phosphate                                       |  |  |
| Q39DZ1 | Bcep18194_A5731 | PF00497 | amino acid<br>(glutamine/glutamate/aspartate?)  |  |  |
| Q39KC2 | Bcep18194_A3492 | PF13416 | sugar                                           |  |  |
| Q39N17 | Bcep18194_C7105 | PF01497 | cobalamin/Fe3+-siderophores                     |  |  |
| Q39M36 | Bcep18194_C7436 | PF03480 | C4-dicarboxylate                                |  |  |
| Q392N6 | Bcep18194_B2469 | PF00497 | amino acid<br>(glutamine/glutamate/aspartate?)  |  |  |
| Q39KN3 | Bcep18194_A3381 | PF13458 | branched-chain amino acid                       |  |  |
| Q39A17 | Bcep18194_B0580 | PF04069 | glycine betaine/L-proline                       |  |  |
| Q392H0 | Bcep18194_B2535 | PF13458 | branched-chain amino acid                       |  |  |
| Q39BT1 | Bcep18194_A6491 | PF00497 | amino acid<br>(glutamine/glutamate/aspartate?)  |  |  |
| Q390R0 | Bcep18194_B2945 | PF13458 | branched-chain amino acid                       |  |  |

|        |                 |         |                                                |  |  |
|--------|-----------------|---------|------------------------------------------------|--|--|
| Q39CR1 | Bcep18194_A6161 | PF04392 | Unclassified                                   |  |  |
| Q392Y4 | Bcep18194_B2371 | PF13407 | ribose                                         |  |  |
| Q399X1 | Bcep18194_B0626 | PF13407 | ribose                                         |  |  |
| Q394Q3 | Bcep18194_B1950 | PF13458 | branched-chain amino acid                      |  |  |
| Q399Y6 | Bcep18194_B0611 | PF04069 | glycine betaine/L-proline                      |  |  |
| Q39LD0 | Bcep18194_C7692 | PF13458 | branched-chain amino acid                      |  |  |
| Q39KZ3 | Bcep18194_A3271 | PF13458 | branched-chain amino acid                      |  |  |
| Q39AT6 | Bcep18194_B0309 | PF03180 | D-methionine                                   |  |  |
| Q39KW9 | Bcep18194_A3295 | PF13458 | branched-chain amino acid                      |  |  |
| Q39KX3 | Bcep18194_A3291 | PF00497 | amino acid<br>(glutamine/glutamate/aspartate?) |  |  |
| Q39B19 | Bcep18194_B0226 | PF03180 | D-methionine                                   |  |  |
| Q39AD9 | Bcep18194_B0458 | PF04069 | glycine betaine/L-proline                      |  |  |
| Q39KZ7 | Bcep18194_A3267 | PF13458 | branched-chain amino acid                      |  |  |
| Q393K1 | Bcep18194_B2254 | PF00497 | amino acid<br>(glutamine/glutamate/aspartate?) |  |  |
| Q39IP8 | Bcep18194_A4071 | PF01547 | sugar                                          |  |  |
| Q39CJ5 | Bcep18194_A6227 | PF09084 | taurine                                        |  |  |
| Q394P2 | Bcep18194_B1961 | PF00497 | amino acid<br>(glutamine/glutamate/aspartate?) |  |  |
| Q39A65 | Bcep18194_B0532 | PF04069 | glycine betaine/L-proline                      |  |  |
| Q39K66 | Bcep18194_A3548 | PF00497 | amino acid<br>(glutamine/glutamate/aspartate?) |  |  |
| Q39P52 | Bcep18194_C6715 | PF00497 | amino acid<br>(glutamine/glutamate/aspartate?) |  |  |
| Q39B17 | Bcep18194_B0228 | PF00497 | amino acid<br>(glutamine/glutamate/aspartate?) |  |  |
| Q392X7 | Bcep18194_B2378 | PF00497 | amino acid<br>(glutamine/glutamate/aspartate?) |  |  |
| Q39CQ9 | Bcep18194_A6163 | PF03180 | D-methionine                                   |  |  |
| Q39JL0 | Bcep18194_A3755 | PF00497 | amino acid<br>(glutamine/glutamate/aspartate?) |  |  |
| Q39GS6 | Bcep18194_A4745 | PF13407 | ribose                                         |  |  |

|        |                 |         |                                                |  |  |
|--------|-----------------|---------|------------------------------------------------|--|--|
| Q39GX6 | Bcep18194_A4695 | PF00497 | amino acid<br>(glutamine/glutamate/aspartate?) |  |  |
| Q39C77 | Bcep18194_A6345 | PF13416 | spermidine/putrescine                          |  |  |
| Q39KW4 | Bcep18194_A3300 | PF00497 | amino acid<br>(glutamine/glutamate/aspartate?) |  |  |
| Q39HI9 | Bcep18194_A4481 | PF00497 | amino acid<br>(glutamine/glutamate/aspartate?) |  |  |
| Q39J28 | Bcep18194_A3939 | PF00497 | amino acid<br>(glutamine/glutamate/aspartate?) |  |  |
| Q399U6 | Bcep18194_B0651 | PF13458 | branched-chain amino acid                      |  |  |
| Q397I9 | Bcep18194_B1258 | PF00496 | dipeptide/oligopeptide                         |  |  |
| Q390E1 | Bcep18194_B3065 | PF01547 | sugar                                          |  |  |
| Q399B1 | Bcep18194_B0836 | PF00497 | amino acid<br>(glutamine/glutamate/aspartate?) |  |  |
| Q394Y0 | Bcep18194_B1867 | PF00496 | dipeptide/oligopeptide                         |  |  |
| Q39AQ6 | Bcep18194_B0339 | PF13458 | branched-chain amino acid                      |  |  |
| Q39M19 | Bcep18194_C7453 | PF00497 | amino acid<br>(glutamine/glutamate/aspartate?) |  |  |
| Q39EN9 | Bcep18194_A5483 | PF00497 | amino acid<br>(glutamine/glutamate/aspartate?) |  |  |
| Q39NI7 | Bcep18194_C6933 | PF13416 | sugar                                          |  |  |
| Q39BK0 | Bcep18194_B0044 | PF00532 | ribose                                         |  |  |
| Q395T6 | Bcep18194_B1661 | PF13458 | branched-chain amino acid                      |  |  |
| Q392A8 | Bcep18194_B2597 | PF00497 | amino acid<br>(glutamine/glutamate/aspartate?) |  |  |
| Q391F7 | Bcep18194_B2798 | PF04069 | glycine betaine/L-proline                      |  |  |
| Q393T6 | Bcep18194_B2169 | PF13416 | spermidine/putrescine                          |  |  |
| Q398Q8 | Bcep18194_B0939 | PF01547 | sugar                                          |  |  |
| Q395J0 | Bcep18194_B1757 | PF09084 | nitrate/sulfonate/taurine                      |  |  |
| Q391Z9 | Bcep18194_B2606 | PF09084 | phosphonates                                   |  |  |
| Q39IE5 | Bcep18194_A4174 | PF03180 | D-methionine                                   |  |  |
| Q39A09 | Bcep18194_B0588 | PF04069 | glycine betaine/L-proline                      |  |  |
| Q39LQ7 | Bcep18194_C7565 | PF13416 | spermidine/putrescine                          |  |  |

|        |                 |         |                                                |  |  |
|--------|-----------------|---------|------------------------------------------------|--|--|
| Q39DR4 | Bcep18194_A5808 | PF13458 | branched-chain amino acid                      |  |  |
| Q398C8 | Bcep18194_B1069 | PF12849 | phosphate                                      |  |  |
| Q39GY6 | Bcep18194_A4685 | PF09084 | nitrate/sulfonate/taurine                      |  |  |
| Q39HH9 | Bcep18194_A4491 | PF01497 | cobalamin/Fe <sup>3+</sup> -siderophores       |  |  |
| Q395I0 | Bcep18194_B1767 | PF13416 | iron(III)                                      |  |  |
| Q392A3 | Bcep18194_B2602 | PF09084 | phosphonates                                   |  |  |
| Q39ML8 | Bcep18194_C7254 | PF12849 | phosphate                                      |  |  |
| Q392I0 | Bcep18194_B2525 | PF09084 | nitrate/sulfonate/taurine                      |  |  |
| Q396G3 | Bcep18194_B1534 | PF00497 | amino acid<br>(glutamine/glutamate/aspartate?) |  |  |
| Q39ED9 | Bcep18194_A5583 | PF13458 | branched-chain amino acid                      |  |  |
| Q39GN7 | Bcep18194_A4784 | PF01497 | cobalamin/Fe <sup>3+</sup> -siderophores       |  |  |
| Q39PN7 | Bcep18194_C6528 | PF09084 | nitrate/sulfonate/taurine                      |  |  |
